# Supplementary material for: Glyoxalase-based toolbox for the enantioselective synthesis of α-hydroxy carboxylic acids
Source: Royal Society of Chemistry journal article supplement (doi:10.1039/d3ob02098c), 2024-01-01

# Supporting information

## Glyoxalase-Based Toolbox for the Enantioselective Synthesis of $\alpha$ -Hydroxy Carboxylic Acids

Mussa Yedigenov,<sup>a†§</sup> Niyaz Amire,<sup>a†¶</sup> Aizat Abdirassil,<sup>a||</sup> Tomiris Mulikova,<sup>a\*\*</sup> Azamat Begenov,<sup>a</sup> Anniina Kiesilä,<sup>b</sup> Anatoly A. Peshkov,<sup>a</sup> Vsevolod A. Peshkov<sup>\*ab</sup> and Darkhan Utepbergenov<sup>\*a</sup>

<sup>a</sup> Department of Chemistry, School of Sciences and Humanities, Nazarbayev University, 53 Kabanbay Batyr Ave, Astana 010000, Republic of Kazakhstan

<sup>b</sup> Department of Chemistry, University of Jyväskylä, Surfontie 9 B, FI-40014, Finland

<sup>†</sup> contributed equally

<sup>§</sup> Present address: Max Planck School Matter to Life, Max Planck Institute for Medical Research, Jahnstraße 29, Heidelberg, 69120, Germany

<sup>¶</sup> Present address: Department of Chemistry, Pennsylvania State University, University Park, PA 16802, USA

<sup>||</sup> Present address: Center for Pharmacogenetics, School of Pharmacy, University of Pittsburgh, 3501 Terrace St, Pittsburgh, PA 15261, USA

<sup>\*\*</sup> Present address: Department of Biochemistry and Biophysics, School of Medicine, University of North Carolina, 120 Mason Farm Rd, Chapel Hill, NC 27599-7260, USA

<sup>\*</sup> E-mail addresses: [ysevolod.peshkov@nu.edu.kz](mailto:ysevolod.peshkov@nu.edu.kz) (V.A.P.), [darkhan.utepbergenov@nu.edu.kz](mailto:darkhan.utepbergenov@nu.edu.kz) (D.U.)

### Table of content

|                                       |     |
|---------------------------------------|-----|
| General Remarks                       | S2  |
| Protein expression and purification   | S3  |
| Screening of type III glyoxalases     | S4  |
| Optimization of Glyoxalase I/II ratio | S9  |
| Synthesis and characterization        | S18 |
| Copies of NMR spectra                 | S49 |
| Copies of HRMS spectra                | S64 |

## General Remarks

**Materials and solvents.** Unless otherwise specified, all reagents and solvents were purchased from commercial sources and used without further purification. Aryl glyoxal hydrates **1** were synthesized following literature procedure.<sup>1</sup>

**NMR spectroscopy.** NMR spectroscopic data were recorded with a Bruker Avance III 300 MHz spectrometer (300.13 MHz for <sup>1</sup>H, 75.47 MHz for <sup>13</sup>C{<sup>1</sup>H} and 282.40 MHz for <sup>19</sup>F{<sup>1</sup>H}) and a Bruker Avance III 500 MHz spectrometer (500.13 MHz for <sup>1</sup>H and 125.76 MHz for <sup>13</sup>C{<sup>1</sup>H}), in DMSO-*d*<sub>6</sub> and were referenced to solvent residual proton signal  $\delta H = 2.50$  ppm, solvent carbon signal  $\delta C = 39.52$  ppm and hexafluorobenzene fluorine signal  $\delta F = -164.9$  ppm.

**Mass spectrometry.** Mass spectra were recorded on Agilent 6560 ESI-IM-QTOF mass spectrometer equipped with AJS ESI ion source. Samples were injected using direct infusion from syringe pump with flow rate of 5  $\mu$ L/min. Stock solutions (10 mM) of samples were prepared with MeOH and filtered if needed. Samples were diluted with MeOH to 5, 10 or 15  $\mu$ M prior to measurements.

**Melting points.** Melting points were determined in open capillary tubes on Stuart Scientific SMP3 melting point apparatus.

**Optical rotations.** Optical rotations were obtained with a Perkin-Elmer 343 polarimeter.

**Enzymatic reaction progress monitoring.** The maximum absorption wavelength ( $\lambda_{\max}$ ) and molar extinction coefficient at  $\lambda_{\max}$  of each aryl glyoxal were acquired using a NanoDrop 2000c spectrophotometer. Enzymatic conversion was continuously monitored by either a decrease in the absorbance at the respective  $\lambda_{\max}$  or a shift of maximum absorbance to a new  $\lambda_{\max}$  due to the strong absorption by some  $\alpha$ -hydroxy acids being produced.

**Chiral UHPLC.** The methods for the detection and separation of the  $\alpha$ -hydroxy acid enantiomers were developed using Astec CLC-D and Astec Chirobiotic T chiral columns on HPLC Accela 600 and Dionex Ultimate 3000 UHPLC respectively. The method for the separation of lactate enantiomers on CLC-D column comprised aqueous solution of 5 mM CuSO<sub>4</sub> as a mobile phase, 1.0 mL/min flow rate, 25°C column oven temperature, 10  $\mu$ L injection volume and UV-Vis detector wavelength of 254 nm. For Astec CLC-D column, L enantiomer generally elutes before D. Separation of aromatic  $\alpha$ -hydroxy acid enantiomers on Chirobiotic T column was achieved using 60% H<sub>2</sub>O acidified with either 0.1% or 0.05% AcOH and 40% MeOH as a mobile phase, 1  $\mu$ L injection volume and varying UV-Vis detector wavelengths (220, 228, 234, 260, 280, 224 nm). The specific flow rate, column oven and sample holder temperature are given below for each provided chiral UHPLC chromatogram. Roughly equimolar mixtures of purified (**R**)-**2** and (**S**)-**2** or unpurified  $\alpha$ HCA**s** **2** obtained with *E. coli* Hsp31 were used as racemic or nearly racemic references.

---

<sup>1</sup> A. A. Peshkov, D. Gapanenok, A. Puzyk, N. Amire, A. S. Novikov, S. D. Martynova, S. Kalinin, D. Dar'in, V. A. Peshkov and M. Krasavin, *The Journal of Organic Chemistry*, 2023, **88**, 10508–10524.

## Protein expression and purification

Expression and purification of human DJ-1, *A. thaliana* DJ-1d, *C. albicans* Glx3, *E. coli* Hsp31 proteins was performed as described.<sup>2,3</sup>

Full length *E. coli* Glyoxalase I and Glyoxalase II were amplified from genomic DNA by Phusion polymerase and cloned into pHis-Parallel2 vector using BamHI and SalI restriction sites. BL21(DE3)-RIPL cells were transformed with Glyoxalase I expression construct and plated on agar plates containing 100 µg/ml ampicillin and 25 µg/ml chloramphenicol. The colonies were picked and grown overnight in 15 mL terrific broth with the same antibiotics at 37°C with shaking at 230 rpm. The cells were then transferred to a 400 mL terrific broth medium with antibiotics and 5 µM NiCl<sub>2</sub> × 6H<sub>2</sub>O and grown at 37°C with shaking at 150 rpm. Expression was induced by the addition of isopropyl β-d-1-thiogalactopyranoside to 0.25 mM and the cells were grown for further 3 hours at 120 rpm. Thereafter, the cells were collected by centrifugation at 6,700 × g, resuspended in 20 mM Tris, 0.5 M NaCl, pH 8.0 (Buffer A) and homogenized. For purification, the homogenate was incubated with lysozyme in the presence of PMSF for 10 minutes, sonicated and centrifuged for 30 min at 55,900 × g and 4°C. The supernatant was applied to a freshly prepared 2 mL Ni-NTA gravity column and unbound proteins were washed off with 30 mL Buffer A containing 10 mM imidazole. Glyoxalase I was eluted with Buffer A containing 150 mM imidazole and desalted into PBS using PD-10 columns. Expression and purification of *E. coli* Glyoxalase II was performed following the same procedure except for the addition of ZnCl<sub>2</sub> × 2H<sub>2</sub>O instead of NiCl<sub>2</sub> × 6H<sub>2</sub>O to 5 µM in a 400 mL terrific broth medium.

---

<sup>2</sup> T. Mulikova, Z. Bekkhozhin, A. Abdirassil and D. Utepbergenov, *Analytical Biochemistry*, 2021, **630**, 114317.

<sup>3</sup> A. Andreeva, Z. Bekkhozhin, N. Omertassova, T. Baizhumanov, G. Yeltay, M. Akhmetali, D. Toibazar and D. Utepbergenov, *Journal of Biological Chemistry*, 2019, **294**, 18863–18872.

## Screening of type III glyoxalases

For the screening of enzymes and substrate scope, 1 mL reactions were set up with 5 mM aryl glyoxal and respective enzyme in Buffer B. When Glyoxalase I and Glyoxalase II were used, the initial concentration of GSH was kept at 250  $\mu$ M in the reaction mixture. Upon completion of the reaction as was informed by absorbance measurements, the samples were centrifuged in Amicon Ultra-0.5 mL centrifugal filters (NMWL = 10K) twice at  $21,130 \times g$  for 6 minutes to remove protein and any aggregates. The flow-through was transferred to clean HPLC vials. For the analysis of the purified  $\alpha$ -hydroxy acids, filtered 1 mL 5 mM aqueous solutions of each product were prepared.

Chiral UHPLC chromatogram of lactic acid (**2a**) racemate:

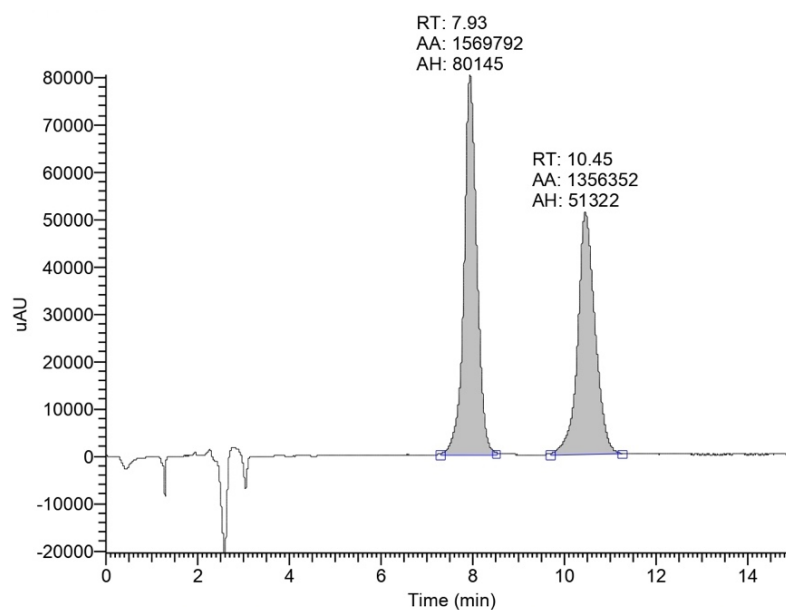

| Peak No.      | Retention Time (RT), min | Area (AA), $\mu$ AU*min | Relative Area, % |
|---------------|--------------------------|-------------------------|------------------|
| 1             | 7.93                     | 1569792                 | 53.65            |
| 2             | 10.45                    | 1356352                 | 46.35            |
| <b>Total:</b> |                          | <b>2926144</b>          | <b>100.00</b>    |

Chiral UHPLC chromatogram of lactic acid (**2a**) formed by the enzymatic conversion of methyl glyoxal hydrate (**1a·H<sub>2</sub>O**) by:

a) *E. coli* Hsp31

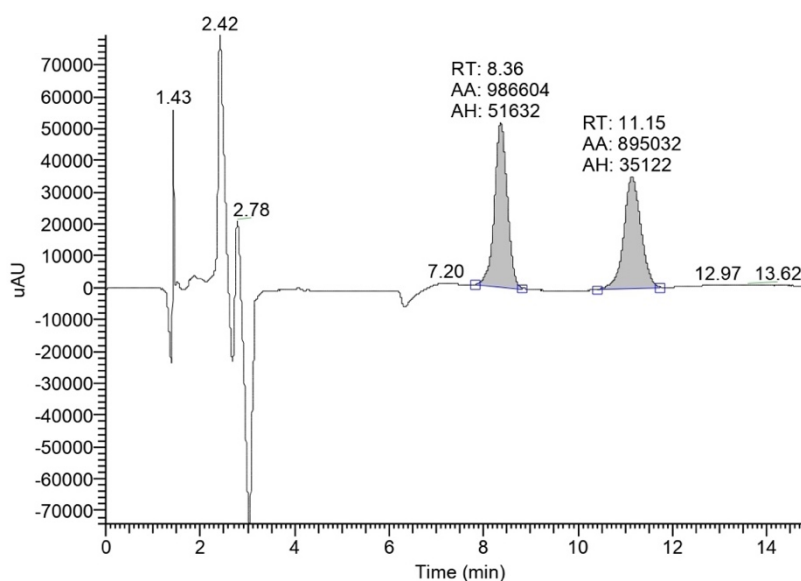

| Peak No.      | Retention Time (RT), min | Area (AA), $\mu\text{AU} \cdot \text{min}$ | Relative Area, % |
|---------------|--------------------------|--------------------------------------------|------------------|
| 1             | 8.36                     | 986604                                     | 52.43            |
| 2             | 11.15                    | 895032                                     | 47.57            |
| <b>Total:</b> |                          | <b>1881636</b>                             | <b>100.00</b>    |

b) *A. thaliana* DJ-1d

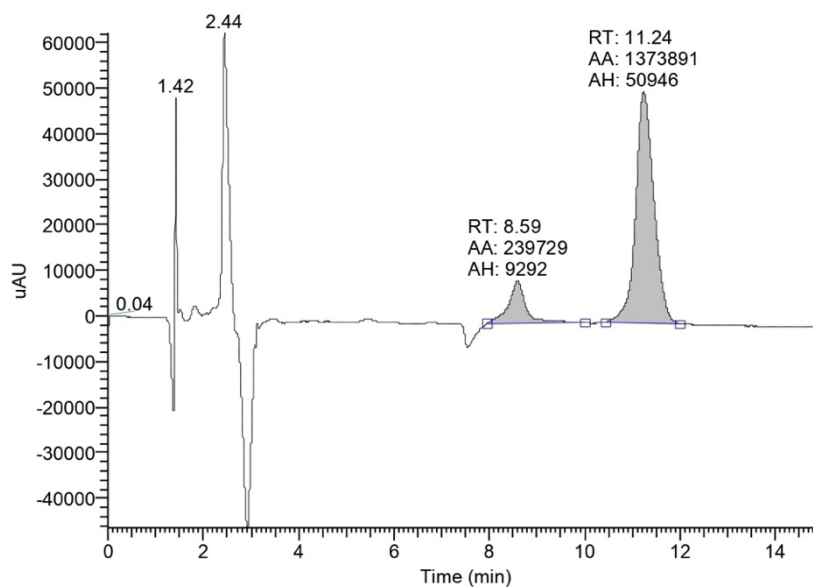

| Peak No.      | Retention Time (RT), min | Area (AA), $\mu\text{AU} \cdot \text{min}$ | Relative Area, % |
|---------------|--------------------------|--------------------------------------------|------------------|
| 1             | 8.59                     | 239729                                     | 14.86            |
| 2             | 11.24                    | 1373891                                    | 85.14            |
| <b>Total:</b> |                          | <b>1613620</b>                             | <b>100.00</b>    |

c) *C. albicans* Glx3

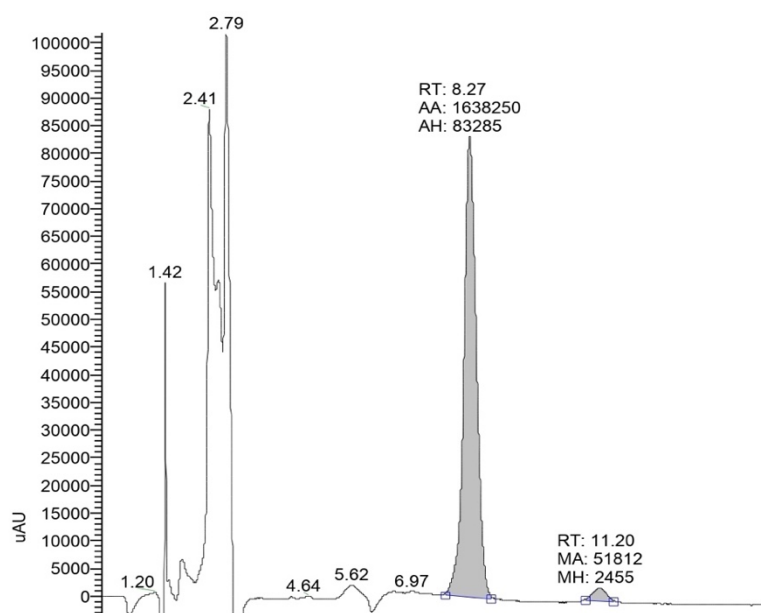

| Peak No.      | Retention Time (RT), min | Area (AA), $\mu\text{AU} \cdot \text{min}$ | Relative Area, % |
|---------------|--------------------------|--------------------------------------------|------------------|
| 1             | 8.27                     | 1638250                                    | 96.93            |
| 2             | 11.20                    | 51812                                      | 3.07             |
| <b>Total:</b> |                          | <b>1690062</b>                             | <b>100.00</b>    |

d) Human DJ-1

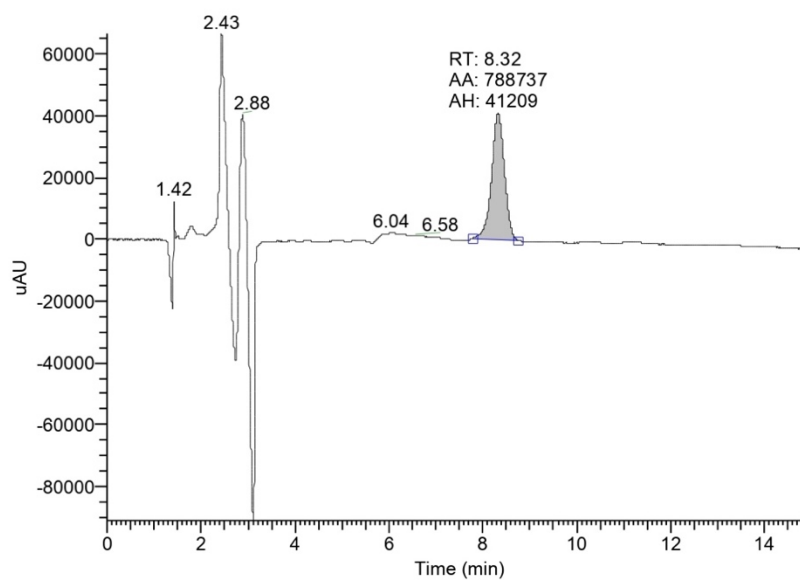

| Peak No.      | Retention Time (RT), min | Area (AA), $\mu\text{AU} \cdot \text{min}$ | Relative Area, % |
|---------------|--------------------------|--------------------------------------------|------------------|
| 1             | 8.32                     | 788737                                     | 100.00           |
| <b>Total:</b> |                          | <b>788737</b>                              | <b>100.00</b>    |

Chiral UHPLC chromatograms obtained with 0.8 ml/min flow rate, 30°C column oven and 5°C sample holder temperature of 2-hydroxy-2-phenylacetic acid (**2b**) formed by the enzymatic conversion of phenyl glyoxal hydrate (**1b**·H<sub>2</sub>O) by:

e) *E. coli* Hsp31

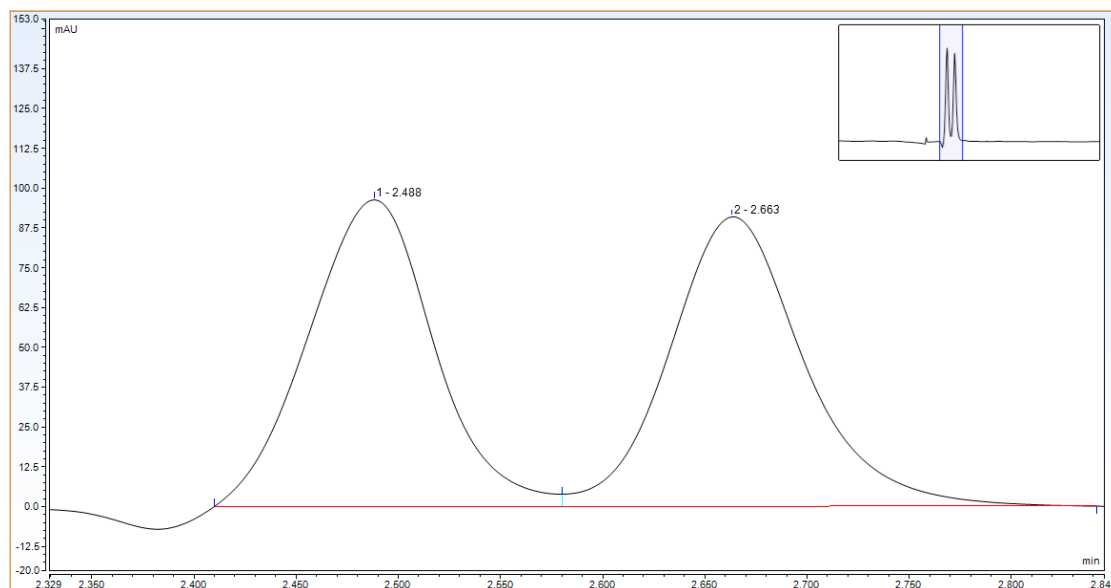

| Peak No.      | Retention Time (RT), min | Area (AA), mAU*min | Relative Area, % |
|---------------|--------------------------|--------------------|------------------|
| 1             | 2.488                    | 6.846              | 49.79            |
| 2             | 2.663                    | 6.904              | 50.21            |
| <b>Total:</b> |                          | <b>13.751</b>      | <b>100.00</b>    |

f) *A. thaliana* DJ-1d

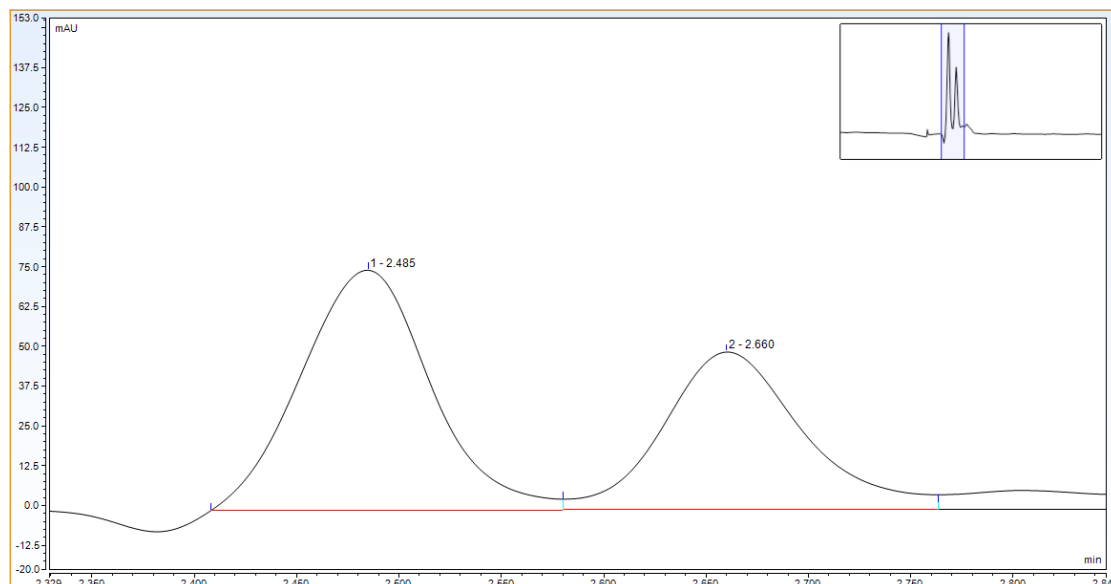

| Peak No.      | Retention Time (RT), min | Area (AA), mAU*min | Relative Area, % |
|---------------|--------------------------|--------------------|------------------|
| 1             | 2.485                    | 5.518              | 58.59            |
| 2             | 2.660                    | 3.900              | 41.41            |
| <b>Total:</b> |                          | <b>9.419</b>       | <b>100.00</b>    |

g) *C. albicans* Glx3

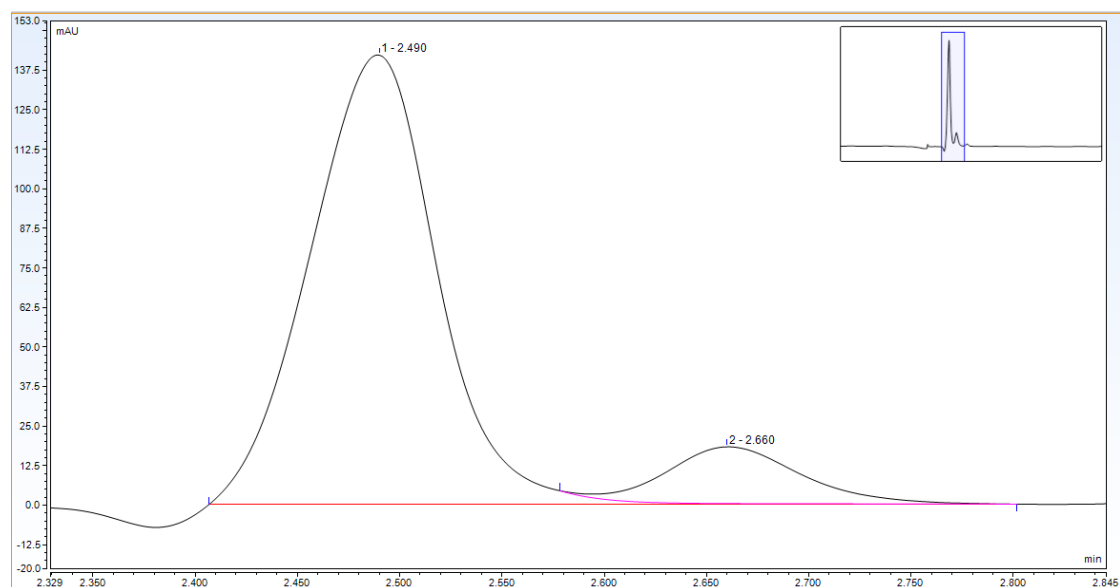

| Peak No.      | Retention Time (RT), min | Area (AA), mAU*min | Relative Area, % |
|---------------|--------------------------|--------------------|------------------|
| 1             | 2.490                    | 10.264             | 88.26            |
| 2             | 2.660                    | 1.365              | 11.74            |
| <b>Total:</b> |                          | <b>11.629</b>      | <b>100.00</b>    |

h) Human DJ-1

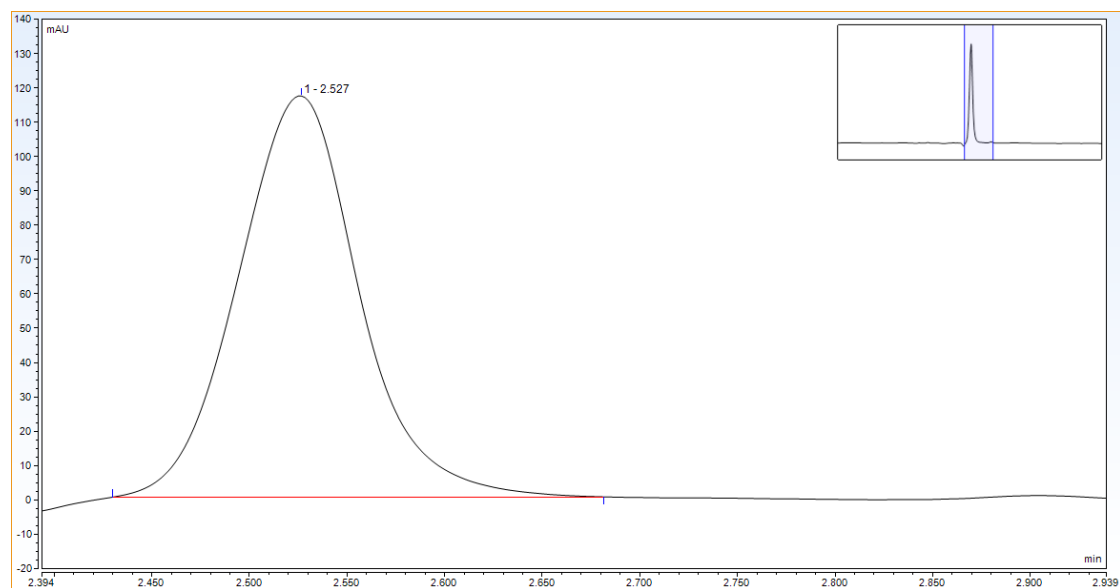

| Peak No.      | Retention Time (RT), min | Area (AA), mAU*min | Relative Area, % |
|---------------|--------------------------|--------------------|------------------|
| 1             | 2.527                    | 8.402              | 100.00           |
| <b>Total:</b> |                          | <b>8.402</b>       | <b>100.00</b>    |

## Optimization of Glyoxalase I/II ratio

Table 1. Optimization of Glyoxalase I and Glyoxalase II concentration ratio

| Glyoxal <b>1</b> , R                           | ee of D- $\alpha$ HCA at the given [GlxI]/[GlxII] ratios, % |     |      |                    |
|------------------------------------------------|-------------------------------------------------------------|-----|------|--------------------|
|                                                | 1:3                                                         | 3:1 | 30:1 | Delay <sup>4</sup> |
| <b>1b</b> , Ph                                 | 91                                                          | 89  | 79   | 68                 |
| <b>1g</b> , 4-BrC <sub>6</sub> H <sub>4</sub>  | 91                                                          | 90  | 87   | 81                 |
| <b>1h</b> , 4-MeOC <sub>6</sub> H <sub>4</sub> | 97                                                          | 97  | 89   | 92                 |
| <b>1n</b> , 5-bromothiophen-2-yl               | 91                                                          | 88  | 72   | 24                 |

The ee values above were obtained from samples of corresponding 1 mL reaction mixtures, not from extracted and purified  $\alpha$ HCA products. Similar or identical preliminary ee values for 1:3 and 3:1 ratios of enzymes, combined with the greater catalytic activity of *E. coli* GlxII compared to GlxI (data not shown), as well as greater ease of extraction and lower enzyme expenditure, prompted us to proceed with around 3:1 ratio of Glyoxalase I and Glyoxalase II for the preparative chemoenzymatic synthesis. Noteworthy, scaling up the protocol resulted only in minor drop of ee for the substrate **1h**, while for the substrates **1b** and **1n**, an increase in the obtained ee values was observed.

Chiral UHPLC chromatograms obtained with 0.8 ml/min flow rate, 30°C column oven and 5°C sample holder temperature of 2-hydroxy-2-phenylacetic acid (**2b**) formed by the glutathione-mediated conversion of phenyl glyoxal hydrate (**1b**·H<sub>2</sub>O) by *E. coli* Glyoxalase I and Glyoxalase II in the respective concentration ratios:

a) 1:3

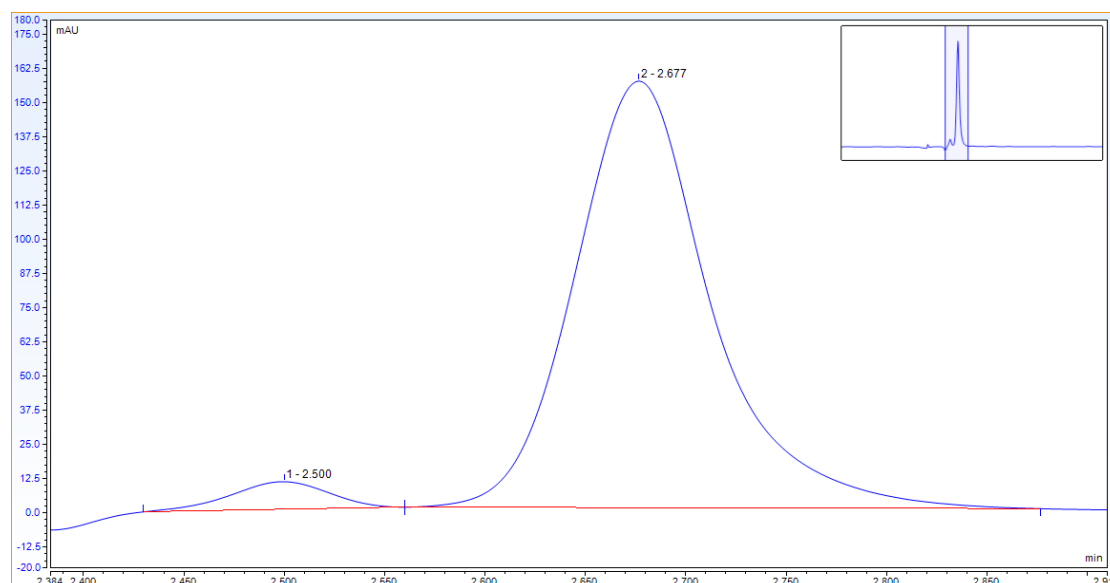

| Peak No.      | Retention Time (RT), min | Area (AA), mAU*min | Relative Area, % |
|---------------|--------------------------|--------------------|------------------|
| 1             | 2.500                    | 0.573              | 4.45             |
| 2             | 2.677                    | 12.295             | 95.55            |
| <b>Total:</b> |                          | <b>12.868</b>      | <b>100.00</b>    |

<sup>4</sup> The substrate was incubated with Glyoxalase I and glutathione for 13 hours, followed by the addition of Glyoxalase II to the resulting mixture and further incubation. The final ratio of enzymes was 3:1 respectively.

b) 3:1

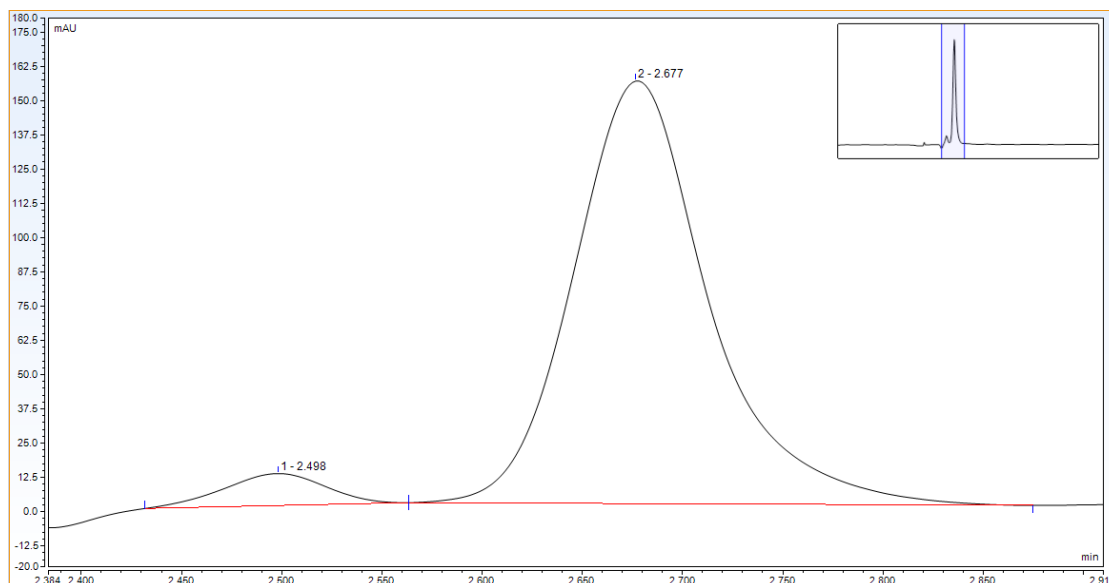

| Peak No.      | Retention Time (RT), min | Area (AA), mAU*min | Relative Area, % |
|---------------|--------------------------|--------------------|------------------|
| 1             | 2.498                    | 0.687              | 5.38             |
| 2             | 2.677                    | 12.093             | 94.62            |
| <b>Total:</b> |                          | <b>12.780</b>      | <b>100.00</b>    |

c) 30:1

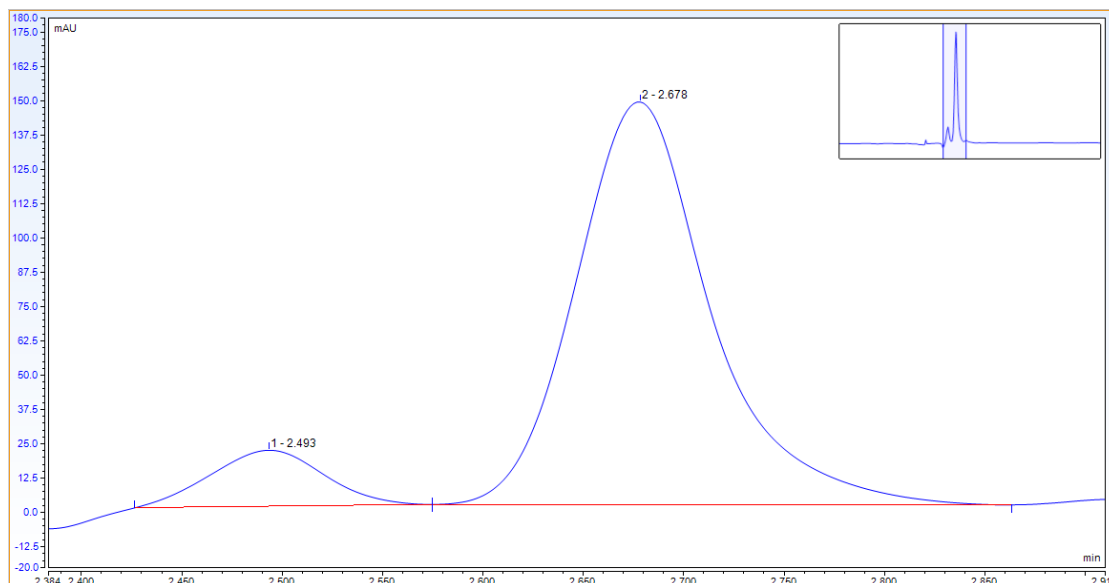

| Peak No.      | Retention Time (RT), min | Area (AA), mAU*min | Relative Area, % |
|---------------|--------------------------|--------------------|------------------|
| 1             | 2.493                    | 1.334              | 10.43            |
| 2             | 2.678                    | 11.461             | 89.57            |
| <b>Total:</b> |                          | <b>12.795</b>      | <b>100.00</b>    |

d) Delay

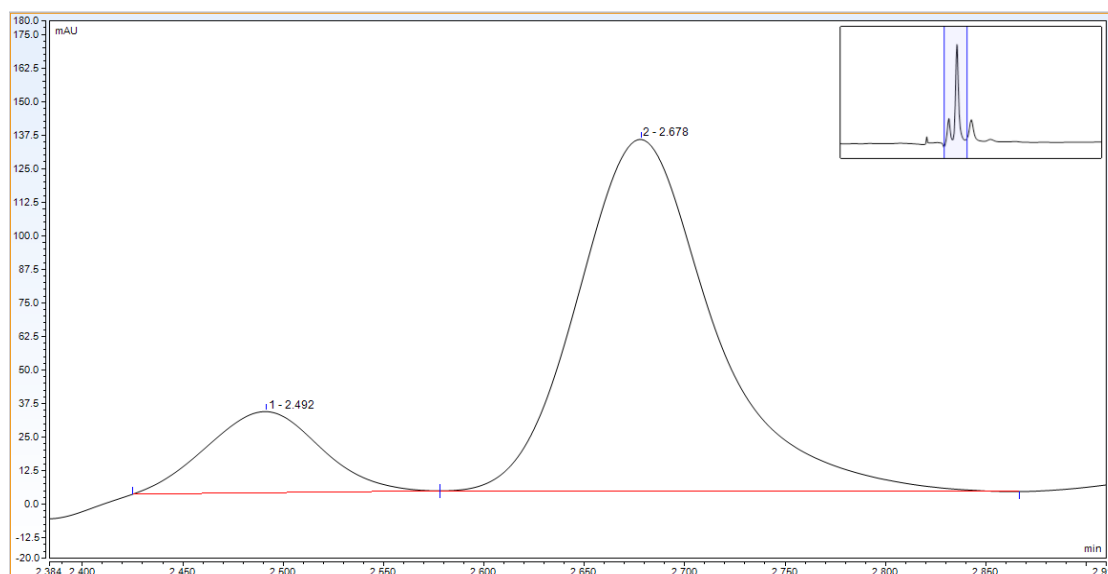

| Peak No.      | Retention Time (RT), min | Area (AA), mAU*min | Relative Area, % |
|---------------|--------------------------|--------------------|------------------|
| 1             | 2.492                    | 1.982              | 16.16            |
| 2             | 2.678                    | 10.281             | 83.84            |
| <b>Total:</b> |                          | <b>12.263</b>      | <b>100.00</b>    |

Chiral UHPLC chromatograms obtained with 0.8 ml/min flow rate, 30°C column oven and 5°C sample holder temperature of 2-(4-bromophenyl)-2-hydroxyacetic acid (**2g**) formed by the glutathione-mediated conversion of 4-Bromophenyl glyoxal hydrate (**1g·H<sub>2</sub>O**) by *E. coli* Glyoxalase I and Glyoxalase II in the respective concentration ratios:

a) 1:3

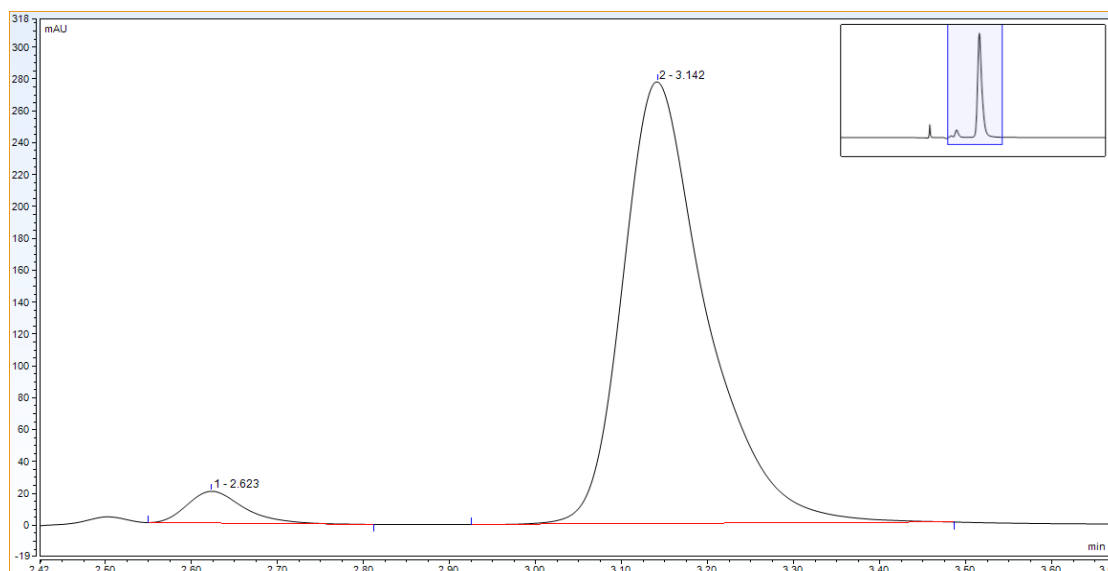

| Peak No.      | Retention Time (RT), min | Area (AA), mAU*min | Relative Area, % |
|---------------|--------------------------|--------------------|------------------|
| 1             | 2.623                    | 1.529              | 4.69             |
| 2             | 3.142                    | 31.075             | 95.31            |
| <b>Total:</b> |                          | <b>32.604</b>      | <b>100.00</b>    |

b) 3:1

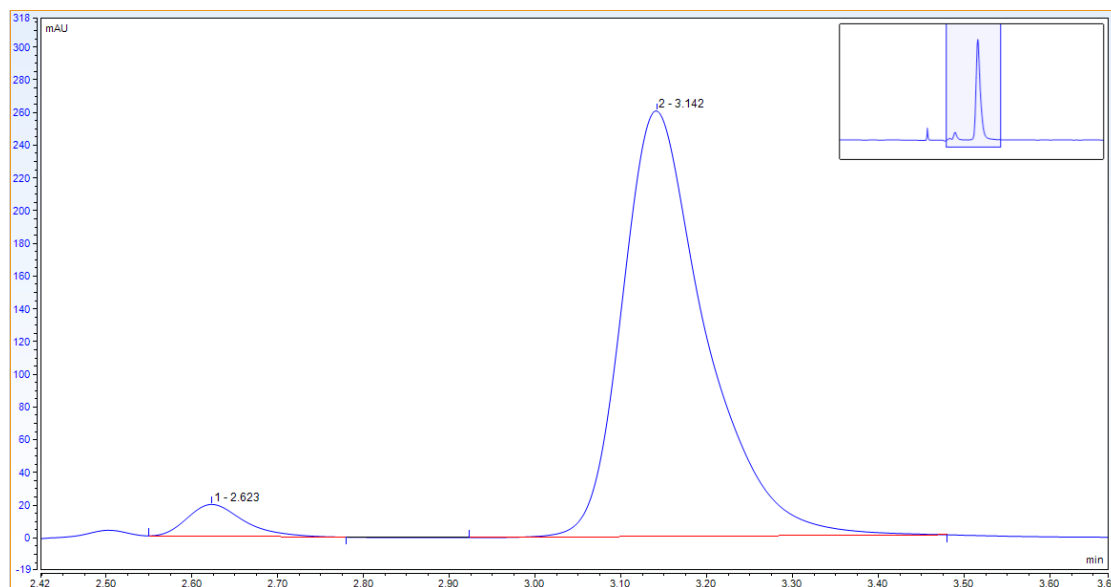

| Peak No.      | Retention Time (RT), min | Area (AA), mAU*min | Relative Area, % |
|---------------|--------------------------|--------------------|------------------|
| 1             | 2.623                    | 1.480              | 4.82             |
| 2             | 3.142                    | 29.213             | 95.18            |
| <b>Total:</b> |                          | <b>30.693</b>      | <b>100.00</b>    |

c) 30:1

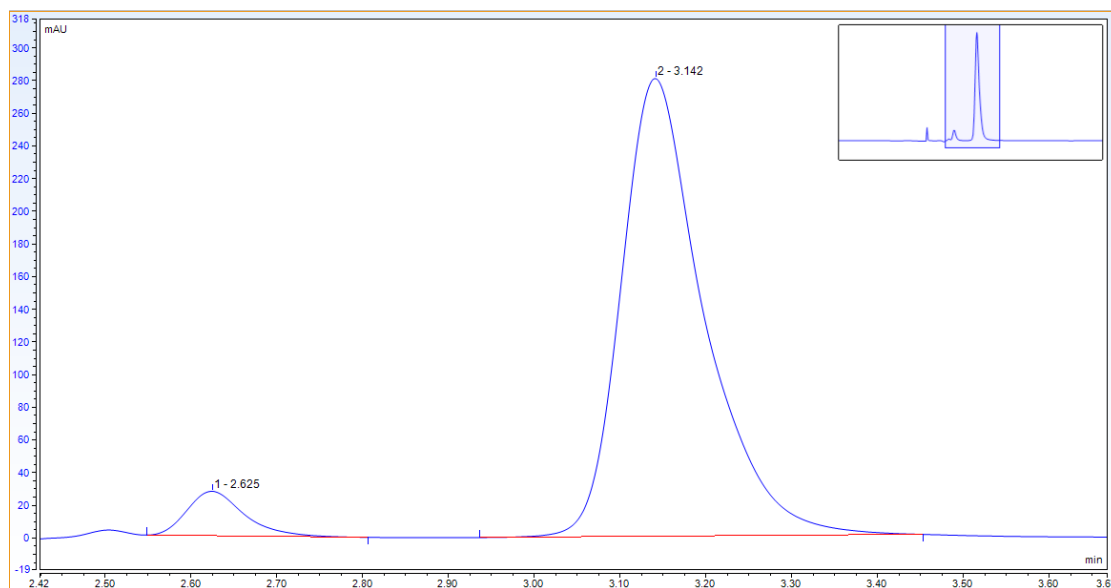

| Peak No.      | Retention Time (RT), min | Area (AA), mAU*min | Relative Area, % |
|---------------|--------------------------|--------------------|------------------|
| 1             | 2.625                    | 2.097              | 6.26             |
| 2             | 3.142                    | 31.376             | 93.74            |
| <b>Total:</b> |                          | <b>33.472</b>      | <b>100.00</b>    |

d) Delay

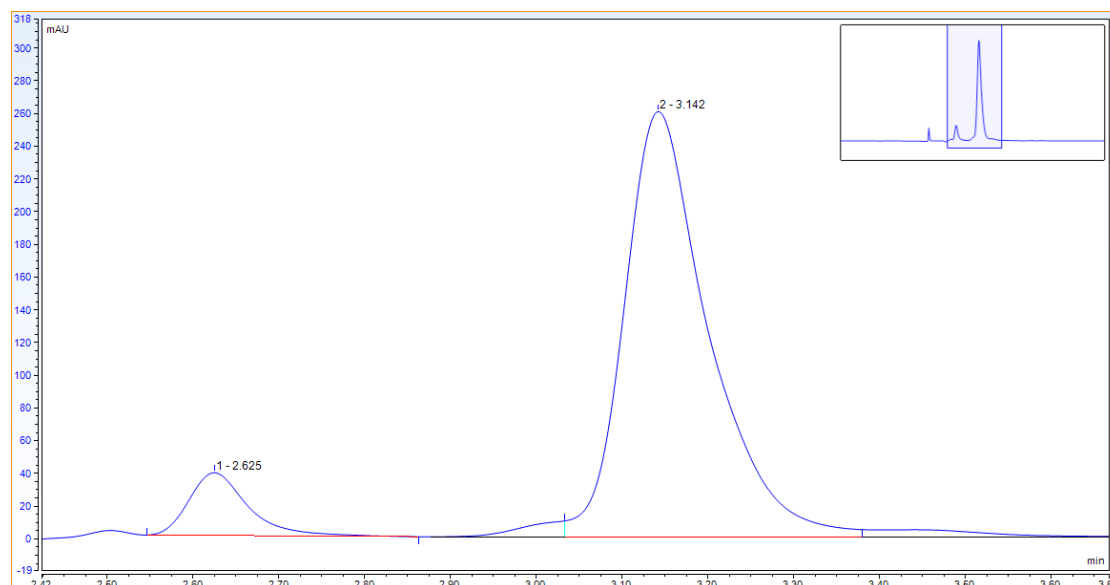

| Peak No.      | Retention Time (RT), min | Area (AA), mAU*min | Relative Area, % |
|---------------|--------------------------|--------------------|------------------|
| 1             | 2.625                    | 3.055              | 9.38             |
| 2             | 3.142                    | 29.517             | 90.62            |
| <b>Total:</b> |                          | <b>32.572</b>      | <b>100.00</b>    |

Chiral UHPLC chromatogram obtained with 0.8 ml/min flow rate, 30°C column oven and 5°C sample holder temperature of 2-hydroxy-2-(4-methoxyphenyl)acetic acid (**2h**) formed by the glutathione-mediated conversion of 4-Methoxyphenyl glyoxal hydrate (**1h**·H<sub>2</sub>O) by *E. coli* Glyoxalase I and Glyoxalase II in the respective concentration ratios:

a) 1:3

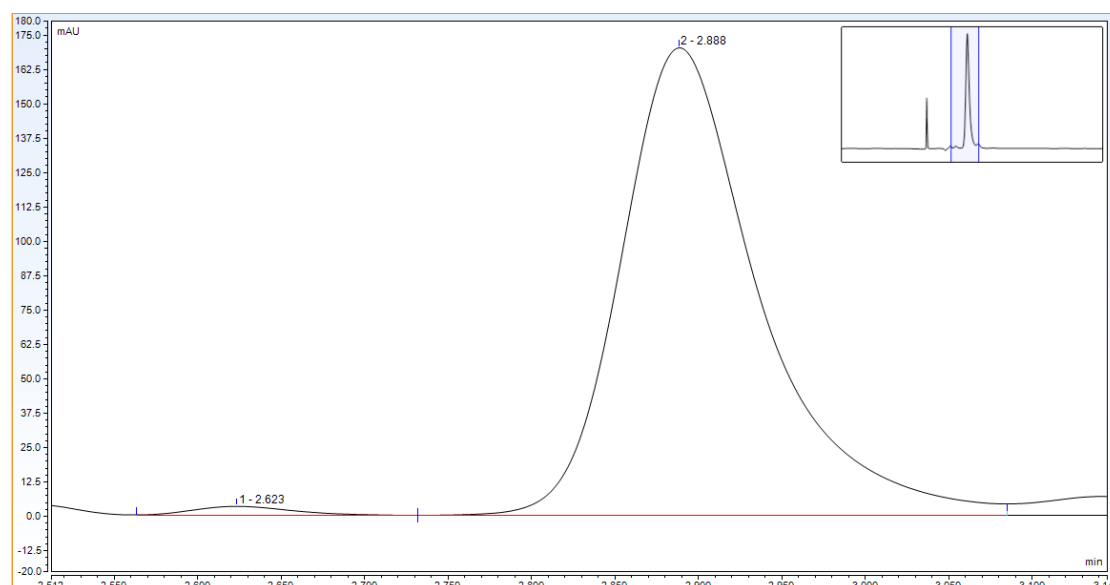

| Peak No.      | Retention Time (RT), min | Area (AA), mAU*min | Relative Area, % |
|---------------|--------------------------|--------------------|------------------|
| 1             | 2.623                    | 0.212              | 1.28             |
| 2             | 2.888                    | 16.367             | 98.72            |
| <b>Total:</b> |                          | <b>16.579</b>      | <b>100.00</b>    |

b) 3:1

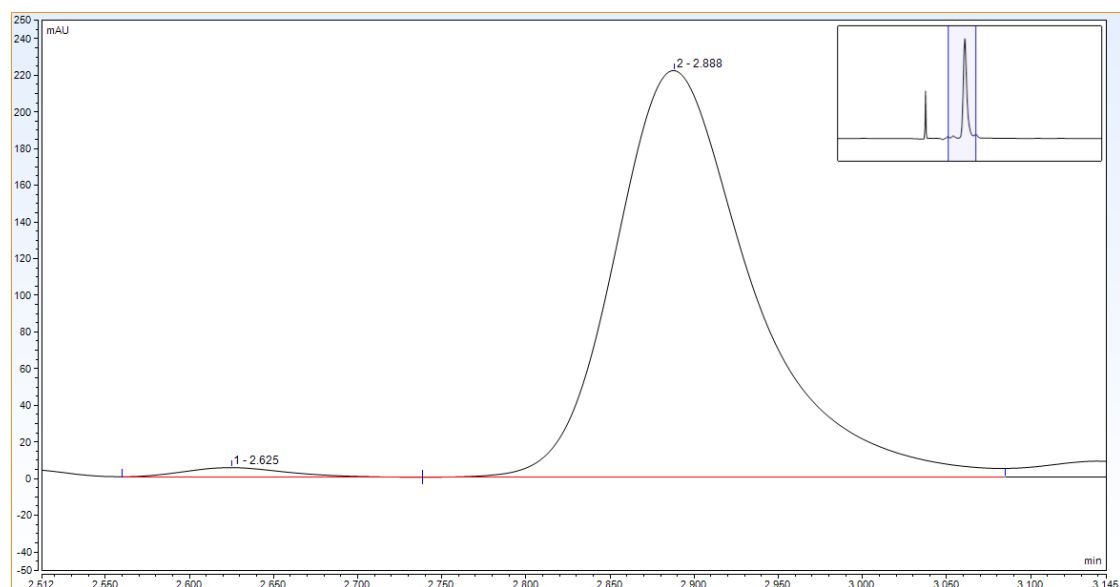

| Peak No.      | Retention Time (RT), min | Area (AA), mAU*min | Relative Area, % |
|---------------|--------------------------|--------------------|------------------|
| 1             | 2.625                    | 0.351              | 1.64             |
| 2             | 2.888                    | 21.057             | 98.36            |
| <b>Total:</b> |                          | <b>21.408</b>      | <b>100.00</b>    |

c) 30:1

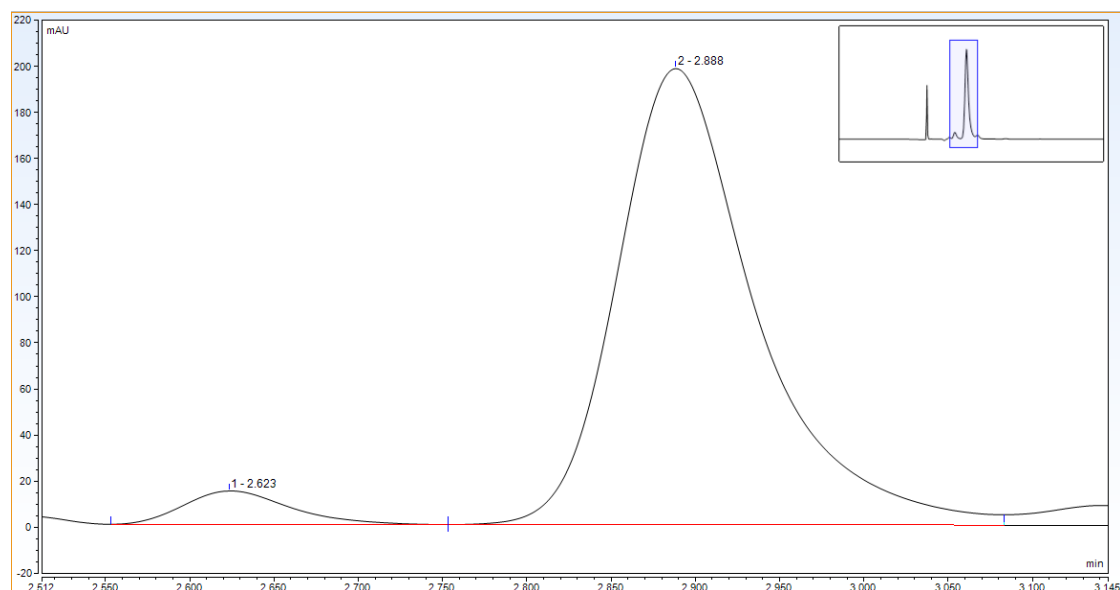

| Peak No.      | Retention Time (RT), min | Area (AA), mAU*min | Relative Area, % |
|---------------|--------------------------|--------------------|------------------|
| 1             | 2.623                    | 1.055              | 5.30             |
| 2             | 2.888                    | 18.872             | 94.70            |
| <b>Total:</b> |                          | <b>19.927</b>      | <b>100.00</b>    |

d) Delay

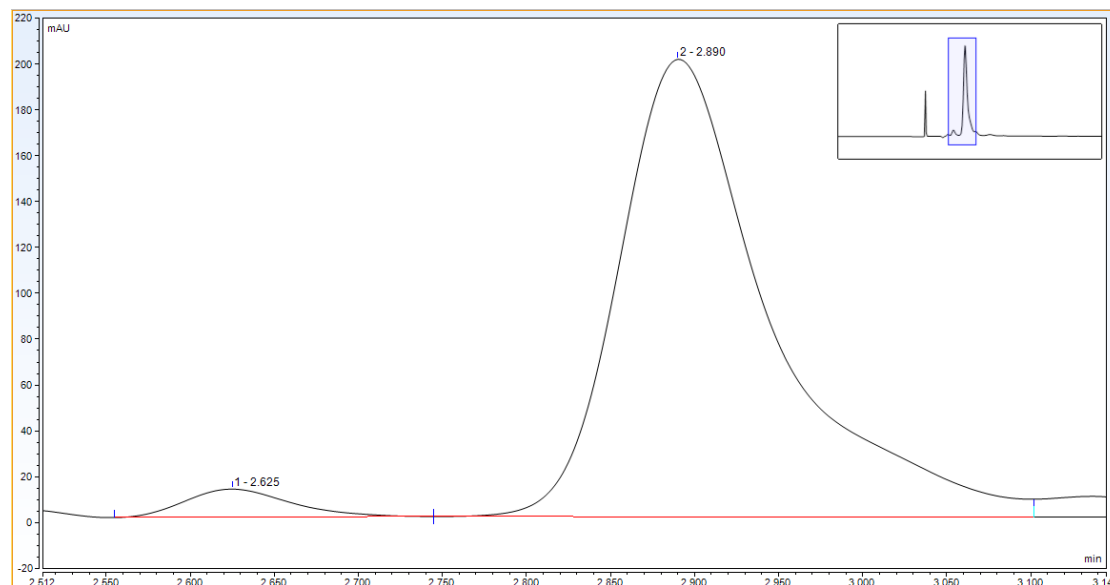

| Peak No.      | Retention Time (RT), min | Area (AA), mAU*min | Relative Area, % |
|---------------|--------------------------|--------------------|------------------|
| 1             | 2.625                    | 0.884              | 4.06             |
| 2             | 2.890                    | 20.893             | 95.94            |
| <b>Total:</b> |                          | <b>21.778</b>      | <b>100.00</b>    |

Chiral UHPLC chromatogram obtained with 0.8 ml/min flow rate, 30°C column oven and 5°C sample holder temperature of 2-(5-bromothiophen-2-yl)-2-hydroxyacetic acid (**2n**) formed by the glutathione-mediated conversion of 5-Bromothiophen-2-yl glyoxal hydrate (**1n·H<sub>2</sub>O**) by *E. coli* Glyoxalase I and Glyoxalase II in the respective concentration ratios:

a) 1:3

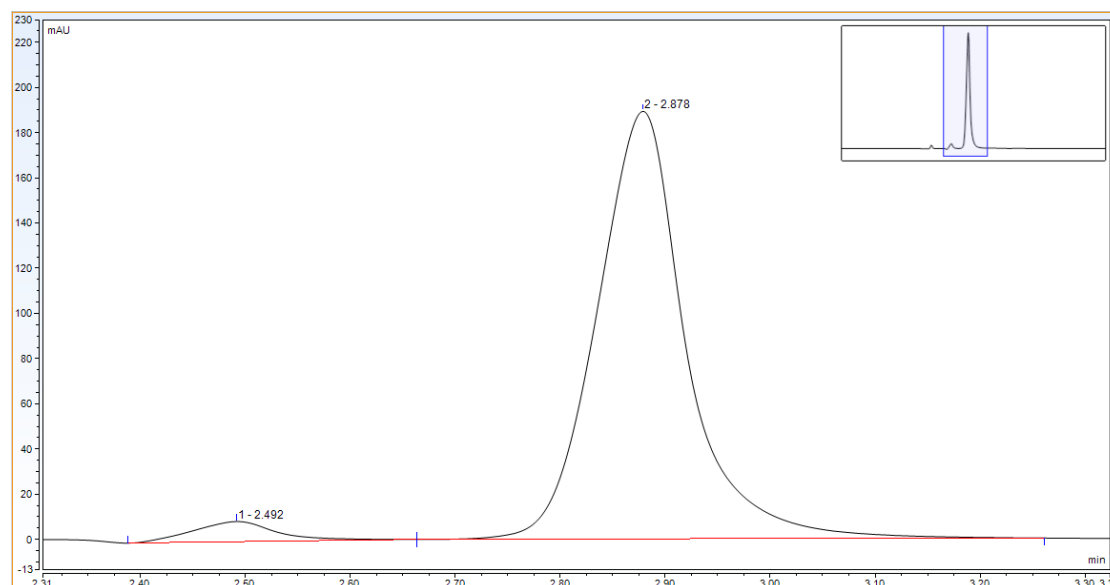

| Peak No.      | Retention Time (RT), min | Area (AA), mAU*min | Relative Area, % |
|---------------|--------------------------|--------------------|------------------|
| 1             | 2.492                    | 0.832              | 4.28             |
| 2             | 2.878                    | 18.599             | 95.72            |
| <b>Total:</b> |                          | <b>19.431</b>      | <b>100.00</b>    |

b) 3:1

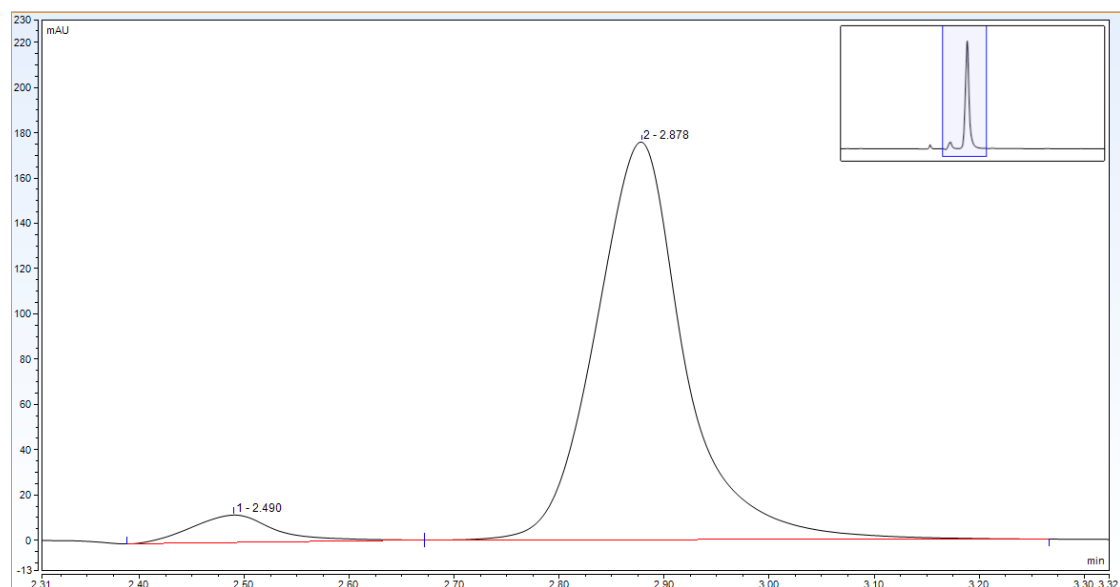

| Peak No.      | Retention Time (RT), min | Area (AA), mAU*min | Relative Area, % |
|---------------|--------------------------|--------------------|------------------|
| 1             | 2.490                    | 1.128              | 6.13             |
| 2             | 2.878                    | 17.266             | 93.87            |
| <b>Total:</b> |                          | <b>18.395</b>      | <b>100.00</b>    |

c) 30: 1

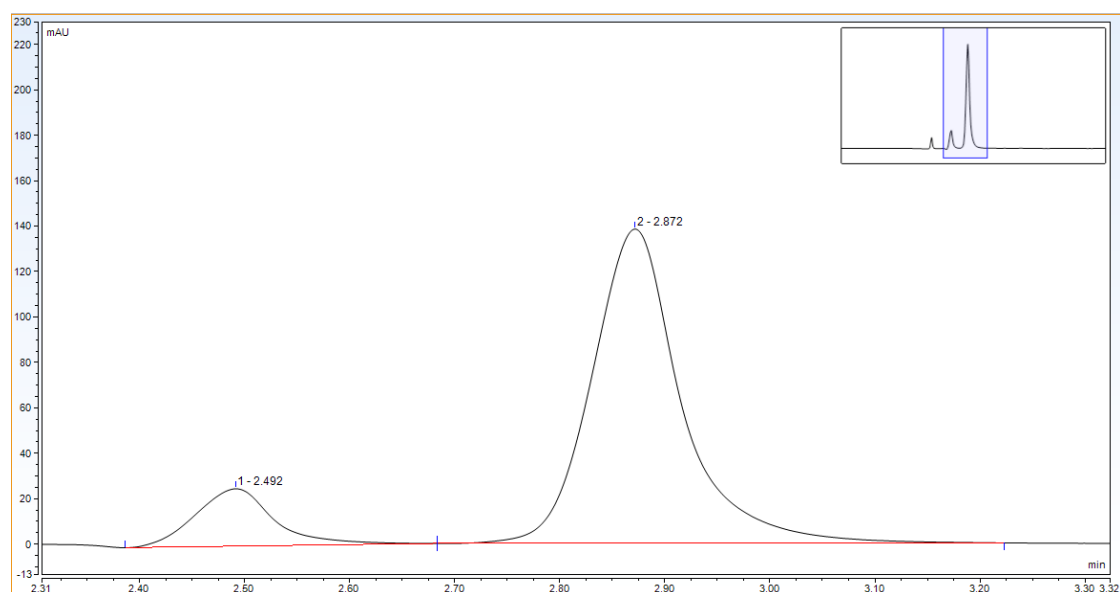

| Peak No.      | Retention Time (RT), min | Area (AA), mAU*min | Relative Area, % |
|---------------|--------------------------|--------------------|------------------|
| 1             | 2.492                    | 2.201              | 13.90            |
| 2             | 2.872                    | 13.631             | 86.10            |
| <b>Total:</b> |                          | <b>15.832</b>      | <b>100.00</b>    |

d) Delay

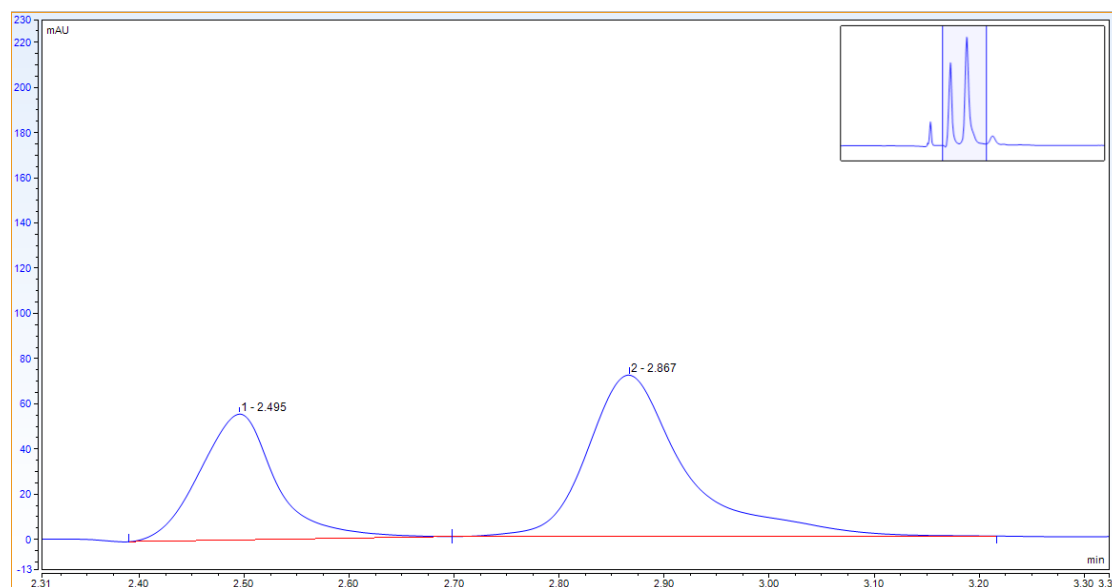

| Peak No.      | Retention Time (RT), min | Area (AA), mAU*min | Relative Area, % |
|---------------|--------------------------|--------------------|------------------|
| 1             | 2.495                    | 4.696              | 37.84            |
| 2             | 2.867                    | 7.712              | 62.16            |
| <b>Total:</b> |                          | <b>12.408</b>      | <b>100.00</b>    |

## Synthesis and characterization

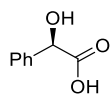

**(R)-2b**

**(R)-(-)-2-Hydroxy-2-phenylacetic acid ((R)-2b).** Phenyl glyoxal hydrate (**1b**·H<sub>2</sub>O, 100 mg, 0.66 mmol) was placed into a 250 mL glass flask and dissolved in sodium phosphate buffer (50 mM, pH = 7) with stirring and heating to obtain a 5 mM solution. The resulting solution was allowed to cool and was mixed with 760 µl phosphate buffer solution containing glutathione, *E. coli* glyoxalase I and glyoxalase II (33 µmol, 7.85 nmol and 2.45 nmol respectively). Upon completion of the reaction (determined by monitoring optical absorbance at 250 nm) the reaction mixture was acidified with a few drops of 12M HCl to pH = 2. The resulting mixture was extracted with ethyl acetate and the organic layer was dried over anhydrous sodium sulfate and concentrated in vacuo. The crude product was triturated with pentane to afford pure **(R)-2b** (94 mg, 0.62 mmol, 94%) as white powder. The large-scale reaction was set up by dissolving **1b** (1.0 g, 6.6 mmol) and glutathione (0.33 mmol) in 100 mL sodium phosphate buffer (50 mM, pH = 7), and the resulting solution was added dropwise to a 50 mL solution of glyoxalase I and glyoxalase II (157 nmol and 49 nmol respectively) in the same buffer. The large-scale reaction using **1b** (1.0 g, 6.6 mmol) delivered **(R)-2b** (0.94 g, 6.2 mmol, 94%) as white powder. *ee* = 97 % [UHPLC].  $[\alpha]_D^{27} = -150$  (*c* = 0.5, MeOH, EtOH or EtOAc). *mp*: 133-135 °C. 0.07-0.8 mL/min flow rate, 5-30°C column oven and 5°C sample holder temperature

Chiral UHPLC chromatogram of (R)-(-)-2-hydroxy-2-phenylacetic acid (**(R)-2b**) obtained with 0.125 ml/min flow rate, 20°C column oven and sample holder temperature:

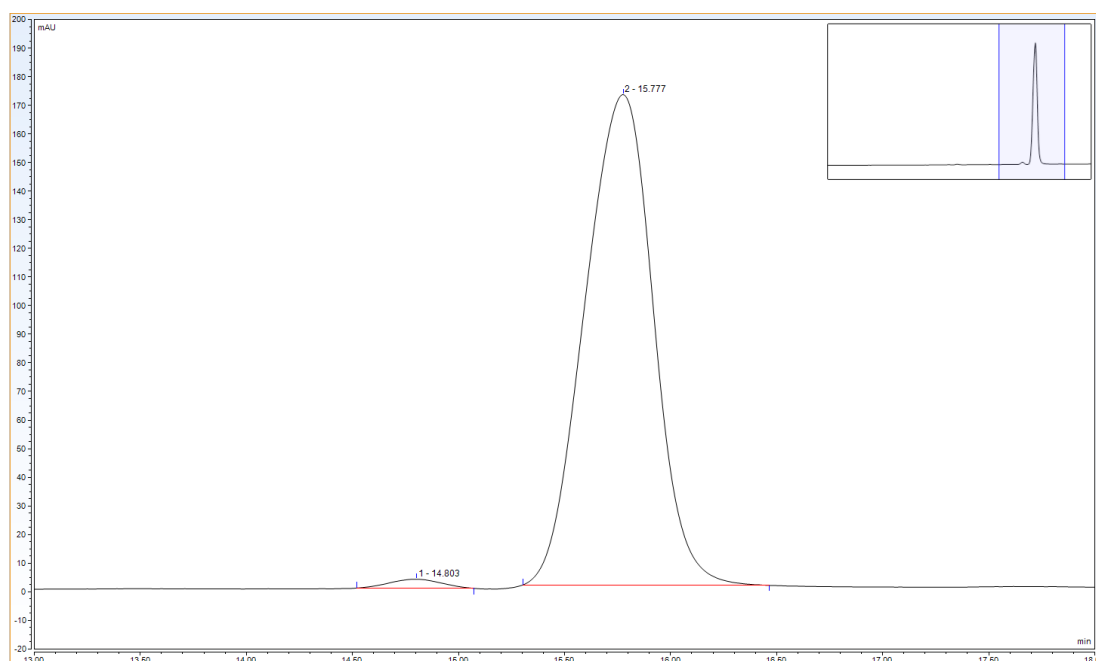

| Peak No. | Retention Time (RT), min | Area (AA), mAU*min | Relative Area, % |
|----------|--------------------------|--------------------|------------------|
| 1        | 14.803                   | 0.8819             | 1.36             |
| 2        | 15.777                   | 64.187             | 98.64            |

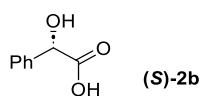

**(S)-(+)-2-Hydroxy-2-phenylacetic acid ((S)-2b).** Phenyl glyoxal hydrate (**1b**·H<sub>2</sub>O, 100 mg, 0.66 mmol) was placed into a 250 mL glass flask and dissolved in sodium phosphate buffer (50 mM, pH = 7) with stirring and heating to obtain a 5 mM solution. The resulting solution was allowed to cool and was mixed with 0.5 ml phosphate buffer solution containing 280 nmol DJ-1. Upon completion of the reaction as was determined by monitoring the drop in the UV/vis absorbance at  $\lambda_{\text{max}} = 250$  nm the reaction mixture was acidified with a few drops of 12M HCl to pH = 2. The resulting mixture was extracted with ethyl acetate and the organic layer was dried over anhydrous sodium sulfate and concentrated in vacuo. The crude product was triturated with pentane to afford pure **(S)-2b** (98 mg, 0.64 mmol, 98%) as white powder. The large-scale reaction was set up by dissolving **1b** (1.0 g, 6.6 mmol) in 100 mL sodium phosphate buffer (50 mM, pH = 7), and the resulting solution was added dropwise to a 50 mL solution containing 9  $\mu$ mol DJ-1 in the same buffer. The large-scale reaction using **1b** (1.0 g, 6.6 mmol) delivered **(S)-2b** (0.92 g, 6.0 mmol, 92%) as white powder. *ee* = >99 % [UHPLC].  $[\alpha]_D^{27} = +153$  (c = 0.5, EtOH or EtOAc). *mp*: 134-136 °C.

Chiral UHPLC chromatogram of (S)-(+)-2-hydroxy-2-phenylacetic acid (**(S)-2b**) obtained with 0.125 ml/min flow rate, 20°C column oven and sample holder temperature:

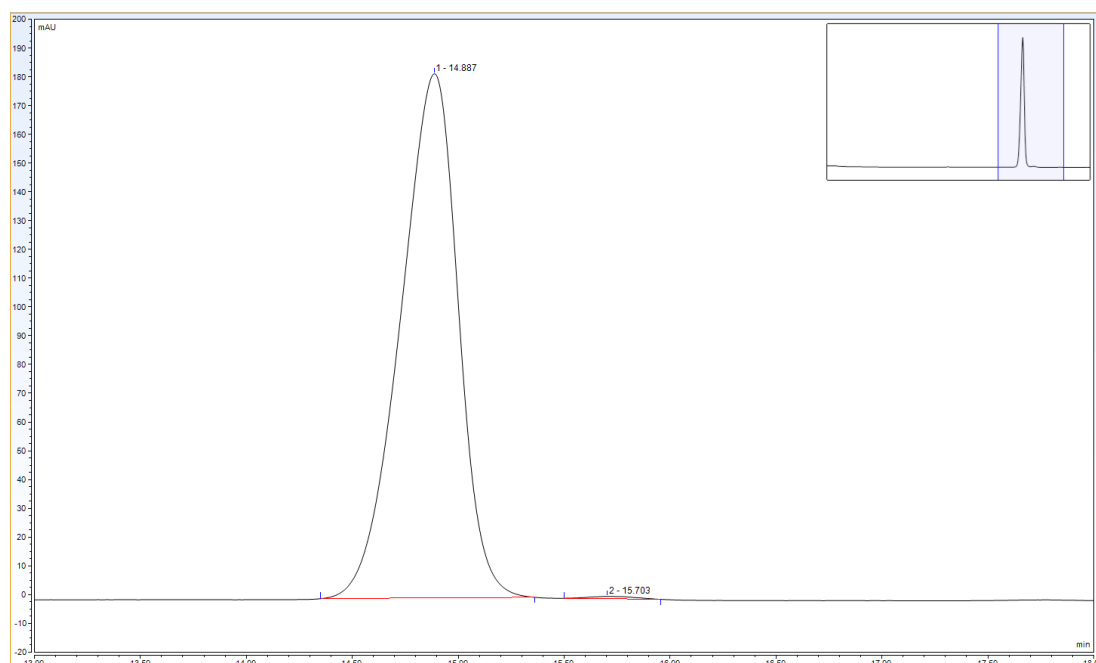

| Peak No. | Retention Time (RT), min | Area (AA), mAU*min | Relative Area, % |
|----------|--------------------------|--------------------|------------------|
| 1        | 14.887                   | 57.5296            | 99.64            |
| 2        | 15.703                   | 0.2083             | 0.36             |

Chiral UHPLC chromatogram of racemic 2-hydroxy-2-phenylacetic acid (**2b**) obtained with 0.125 ml/min flow rate, 20°C column oven and sample holder temperature:

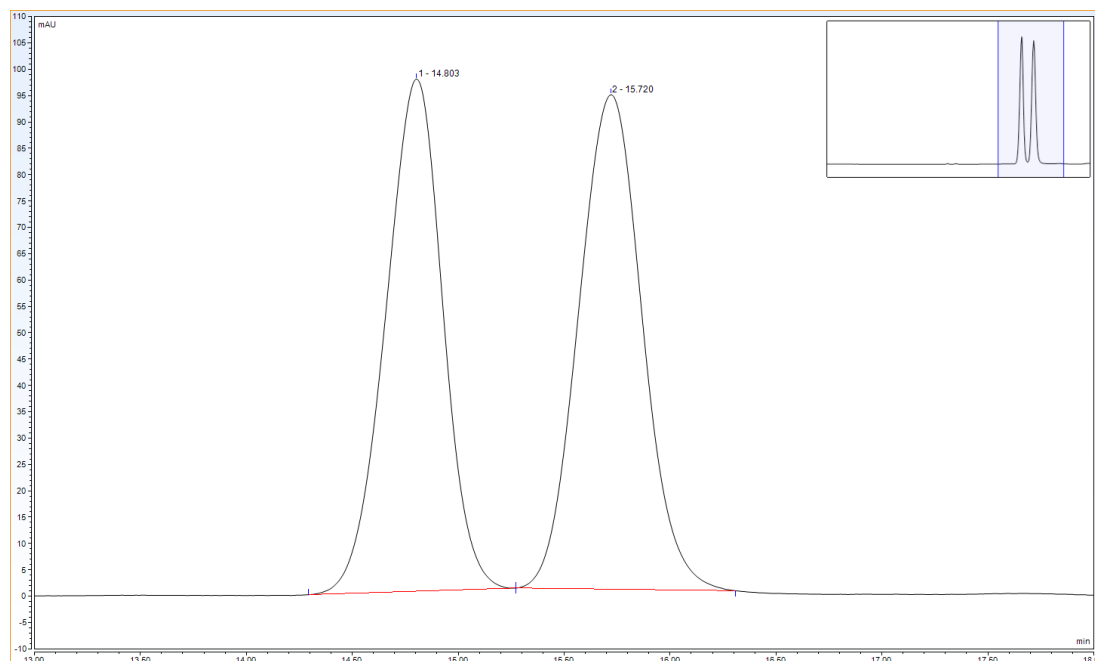

| Peak No. | Retention Time (RT), min | Area (AA), mAU*min | Relative Area, % |
|----------|--------------------------|--------------------|------------------|
| 1        | 14.803                   | 30.3829            | 48.24            |
| 2        | 15.72                    | 32.5939            | 51.76            |

$^1\text{H}$  NMR (300 MHz,  $\text{DMSO-}d_6$ ):  $\delta$  7.45 – 7.38 (m, 2H), 7.38 – 7.23 (m, 3H), 5.83 (bs, 1H), 5.02 (s, 1H).  $^{13}\text{C}\{^1\text{H}\}$  NMR (125 MHz  $\text{DMSO-}d_6$ ):  $\delta$  174.1, 140.3, 128.1, 127.7, 126.7, 72.4; HRMS (ESI,  $[M-H]^-$ ) for  $\text{C}_8\text{H}_7\text{O}_3^-$  calcd 151.0401, found 151.0399.

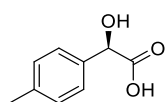

(*R*)-**2c**

**(*R*)-(-)-2-Hydroxy-2-(*p*-tolyl)acetic acid ((*R*)-**2c**).**<sup>5</sup> *p*-Tolyl glyoxal hydrate (**1c**· $\text{H}_2\text{O}$ , 100 mg, 0.60 mmol) was placed into a 250 mL glass flask and dissolved in sodium phosphate buffer (50 mM, pH = 7) with stirring and heating to obtain a 5 mM solution. The resulting solution was allowed to cool and was mixed with 700  $\mu\text{L}$  phosphate buffer solution containing glutathione, *E. coli* glyoxalase I and glyoxalase II (30  $\mu\text{mol}$ , 7.85 nmol and 2.45 nmol respectively). Upon completion of the reaction as was determined by monitoring the drop in the UV/vis absorbance at  $\lambda_{\text{max}} = 263$  nm the reaction mixture was acidified with a few drops of 12M HCl to pH = 2. The resulting mixture was extracted with ethyl acetate and the organic layer was dried over anhydrous sodium sulfate and concentrated in vacuo. The crude product was triturated with pentane to afford pure (*R*)-**2c** (99 mg, 0.60 mmol, 99%) as beige solid. *ee* = 98 % [UHPLC].  $[\alpha]_D^{27} = -146$  ( $c = 0.5$ , EtOAc). *mp*: 118–121 °C.

<sup>5</sup> J. R. E. Hoover, G. L. Dunn, D. R. Jakas, L. L. Lam, J. J. Taggart, J. R. Guarini, and L. Phillips, *Journal of Medicinal Chemistry*, 1974, **17**, 34–41.

Chiral UHPLC chromatogram of (*R*)-(-)-2-hydroxy-2-(*p*-tolyl)acetic acid (**(*R*)-2c**) obtained with 0.125 ml/min flow rate, 5°C column oven and 20°C sample holder temperature:

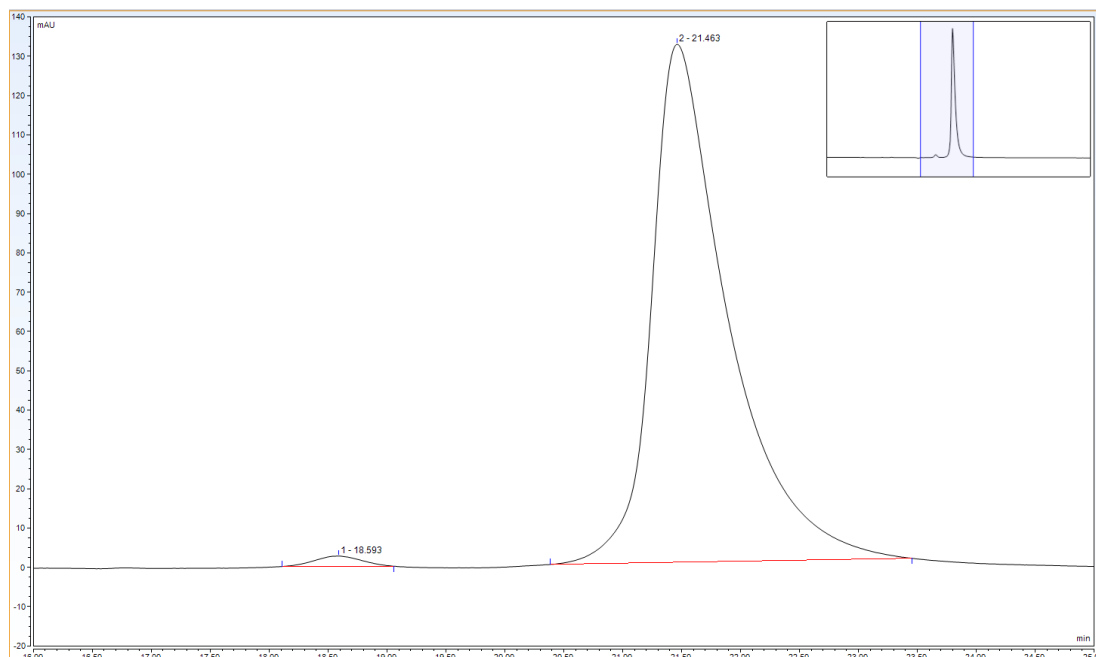

| Peak No. | Retention Time (RT), min | Area (AA), mAU*min | Relative Area, % |
|----------|--------------------------|--------------------|------------------|
| 1        | 18.593                   | 1.2079             | 1.20             |
| 2        | 21.463                   | 99.1562            | 98.80            |

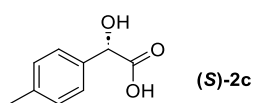

**(*S*)-(+)-2-Hydroxy-2-(*p*-tolyl)acetic acid (**(*S*)-2c**).** *p*-Tolyl glyoxal hydrate (**1c·H<sub>2</sub>O**, 100 mg, 0.60 mmol) was placed into a 250 mL glass flask and dissolved in sodium phosphate buffer (50 mM, pH = 7) with stirring and heating to obtain a 5 mM solution. The resulting solution was allowed to cool and was mixed with 1.4 ml phosphate buffer solution containing 784 nmol DJ-1. Upon completion of the reaction as was determined by monitoring the drop in the UV/vis absorbance at  $\lambda_{\text{max}} = 263$  nm the reaction mixture was acidified with a few drops of 12M HCl to pH = 2. The resulting mixture was extracted with ethyl acetate and the organic layer was dried over anhydrous sodium sulfate and concentrated in vacuo. The crude product was triturated with pentane to afford pure **(*S*)-2c** (97 mg, 0.58 mmol, 97%) as beige solid.  $ee = 98\%$  [UHPLC].  $[\alpha]_D^{27} = +149$  ( $c = 0.6$ , EtOAc). **mp**: 123-126 °C.

Chiral UHPLC chromatogram of (*S*)-(+)-2-hydroxy-2-(*p*-tolyl)acetic acid (**(S)-2c**) obtained with 0.125 ml/min flow rate, 5°C column oven and 20°C sample holder temperature:

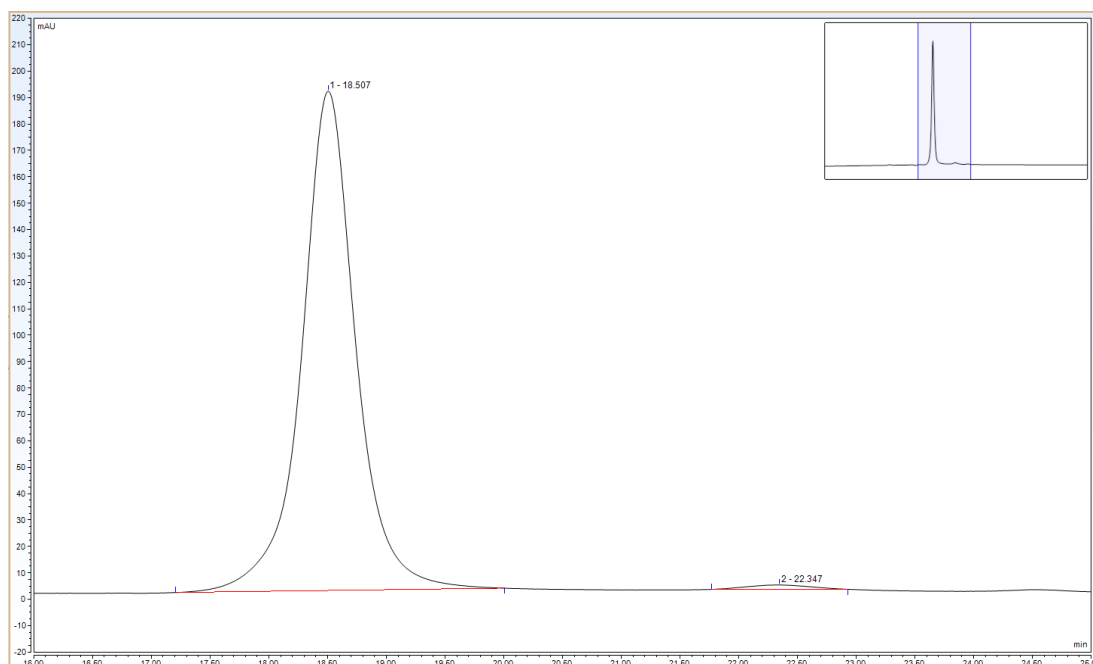

| Peak No. | Retention Time (RT), min | Area (AA), mAU*min | Relative Area, % |
|----------|--------------------------|--------------------|------------------|
| 1        | 18.507                   | 100.9578           | 99.00            |
| 2        | 22.347                   | 1.0187             | 1.00             |

Chiral UHPLC chromatogram of nearly racemic 2-hydroxy-2-(*p*-tolyl)acetic acid (**2c**) obtained with 0.125 ml/min flow rate, 5°C column oven and 20°C sample holder temperature:

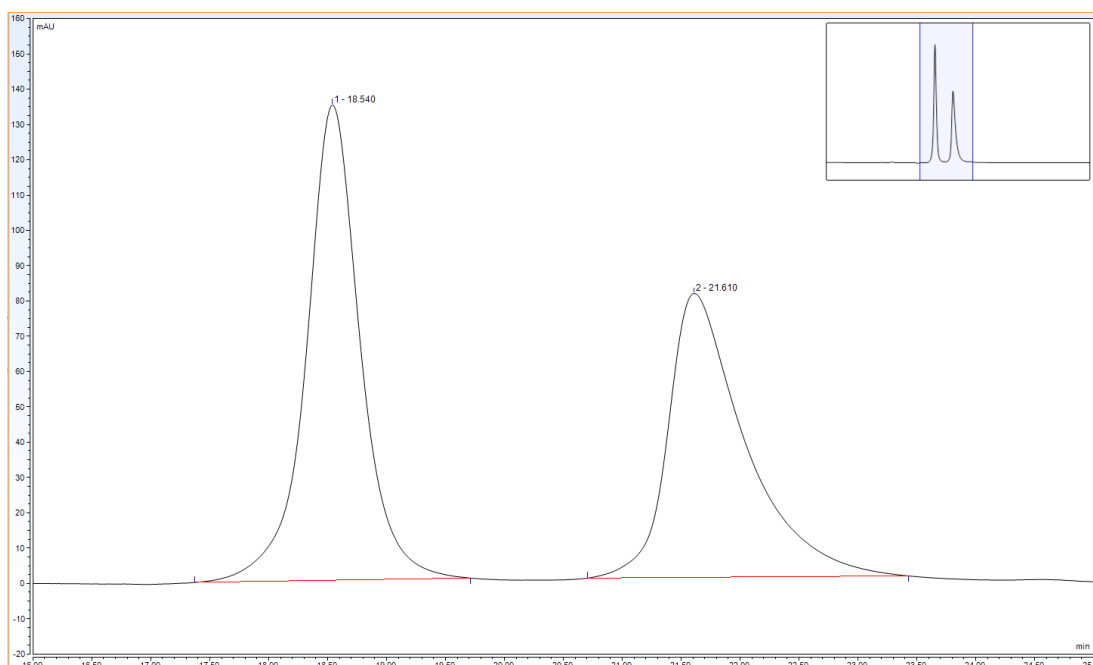

| Peak No. | Retention Time (RT), min | Area (AA), mAU*min | Relative Area, % |
|----------|--------------------------|--------------------|------------------|
| 1        | 18.54                    | 71.309             | 53.93            |
| 2        | 21.61                    | 60.9103            | 46.07            |

**<sup>1</sup>H NMR (300 MHz, DMSO-D<sub>6</sub>):** δ 7.29 (d, *J* = 8.1 Hz, 2H), 7.14 (d, *J* = 7.9 Hz, 2H), 5.72 (bs, 1H), 4.97 (s, 1H), 2.28 (s, 3H). **<sup>13</sup>C{<sup>1</sup>H} NMR (75 MHz, DMSO-D<sub>6</sub>):** δ 174.2, 137.3, 136.7, 128.6, 126.5, 72.2, 20.7; **HRMS (ESI, [M-H]<sup>-</sup>)** for C<sub>9</sub>H<sub>9</sub>O<sub>3</sub><sup>-</sup> calcd 165.0557, found 165.0554.

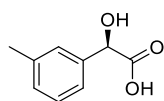

**(R)-2d**

**(R)-(-)-2-Hydroxy-2-(*m*-tolyl)acetic acid ((R)-2d).**<sup>5</sup> *m*-Tolyl glyoxal hydrate (**1d·H<sub>2</sub>O**, 100 mg, 0.60 mmol) was placed into a 250 mL glass flask and dissolved in sodium phosphate buffer (50 mM, pH = 7) with stirring and heating to obtain a 5 mM solution. The resulting solution was allowed to cool and was mixed with 700 µl phosphate buffer solution containing glutathione, *E. coli* glyoxalase I and glyoxalase II (30 µmol, 7.85 nmol and 2.45 nmol respectively). Upon completion of the reaction as was determined by monitoring the drop in the UV/vis absorbance at λ<sub>max</sub> = 255 nm the reaction mixture was acidified with a few drops of 12M HCl to pH = 2. The resulting mixture was extracted with ethyl acetate and the organic layer was dried over anhydrous sodium sulfate followed by addition of silica gel and concentration in vacuo. Column chromatography<sup>6</sup> with DCM/MeOH/HCOOH (9:1:0→9:1:0.02) as eluent followed by trituration with pentane afforded pure **(R)-2d** (67 mg, 0.40 mmol, 67%) as white solid. *ee* = >99 % [UHPLC]. [*α*]<sub>D</sub><sup>27</sup> = -143 (c = 0.36, EtOAc). *mp*: 105-108 °C.

Chiral UHPLC chromatogram of *(R)*-(-)-2-hydroxy-2-(*m*-tolyl)acetic acid (**(R)-2d**) obtained with 0.07 ml/min flow rate, 5°C column oven and 20°C sample holder temperature:

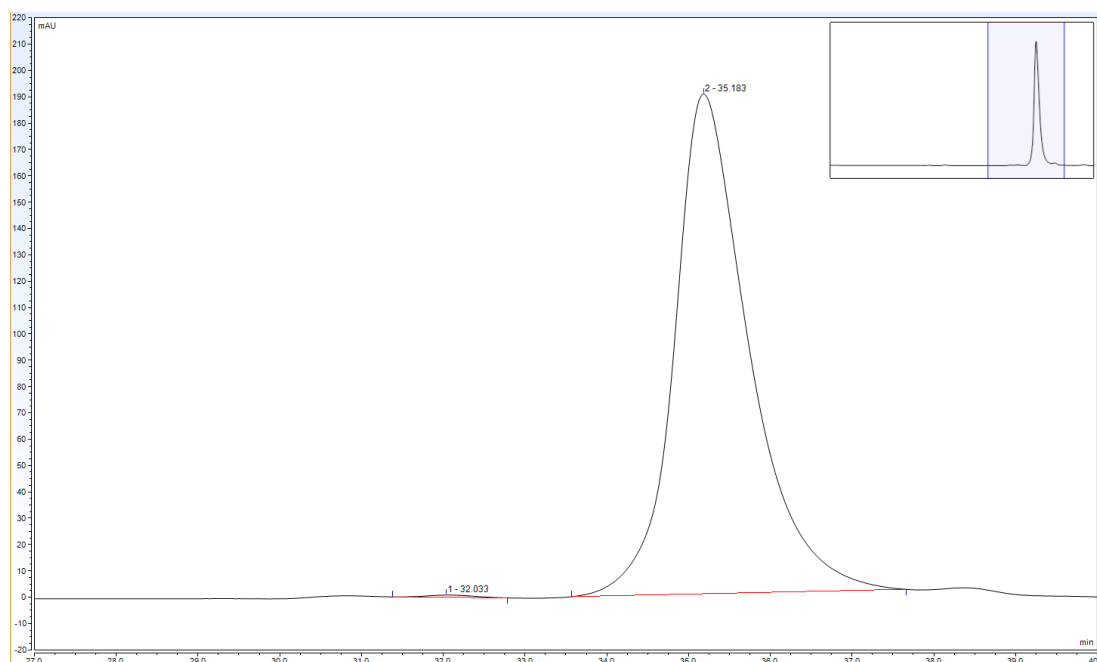

| Peak No. | Retention Time (RT), min | Area (AA), mAU*min | Relative Area, % |
|----------|--------------------------|--------------------|------------------|
| 1        | 32.033                   | 0.5797             | 0.29             |
| 2        | 35.183                   | 200.6875           | 99.71            |

<sup>6</sup> All columns were initially packed with silicagel and DCM. Crude product was applied via solid load, then the elution with the eluent mixture was started.

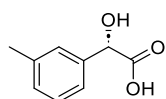

**(S)-2d**

**(S)-(+)-2-Hydroxy-2-(*m*-tolyl)acetic acid ((S)-2d).** *m*-Tolyl glyoxal hydrate (**1d**·H<sub>2</sub>O, 100 mg, 0.60 mmol) was placed into a 250 mL glass flask and dissolved in sodium phosphate buffer (50 mM, pH = 7) with stirring and heating to obtain a 5 mM solution. The resulting solution was allowed to cool and was mixed with 2.6 ml phosphate buffer solution containing 1.57 μmol DJ-1. Upon completion of the reaction as was determined by monitoring the drop in the UV/vis absorbance at  $\lambda_{\text{max}} = 255$  nm the reaction mixture was acidified with a few drops of 12M HCl to pH = 2. The resulting mixture was extracted with ethyl acetate and the organic layer was dried over anhydrous sodium sulfate followed by addition of silica gel and concentration in vacuo. Column chromatography<sup>6</sup> with DCM/MeOH/HCOOH (9:1:0→9:1:0.02) as eluent followed by trituration with pentane afforded pure **(S)-2d** (59 mg, 0.36 mmol, 59%) as white solid. *ee* = 98 % [UHPLC].  $[\alpha]_D^{27} = +138$  (*c* = 0.36, EtOAc). *mp*: 109-111 °C.

Chiral UHPLC chromatogram of (S)-(+)-2-hydroxy-2-(*m*-tolyl)acetic acid (**(S)-2d**) obtained with 0.07 ml/min flow rate, 5°C column oven and 20°C sample holder temperature:

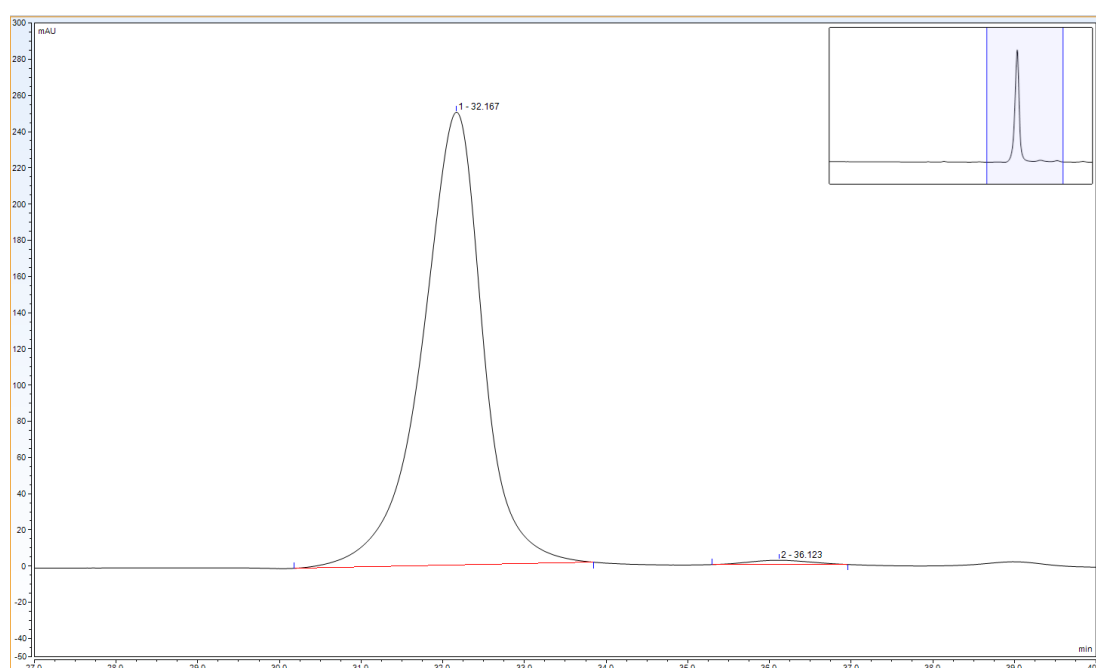

| Peak No. | Retention Time (RT), min | Area (AA), mAU*min | Relative Area, % |
|----------|--------------------------|--------------------|------------------|
| 1        | 32.167                   | 215.9292           | 99.05            |
| 2        | 36.123                   | 2.0627             | 0.95             |

Chiral UHPLC chromatogram of racemic 2-hydroxy-2-(*m*-tolyl)acetic acid (**2d**) obtained with 0.07 ml/min flow rate, 5°C column oven and 20°C sample holder temperature:

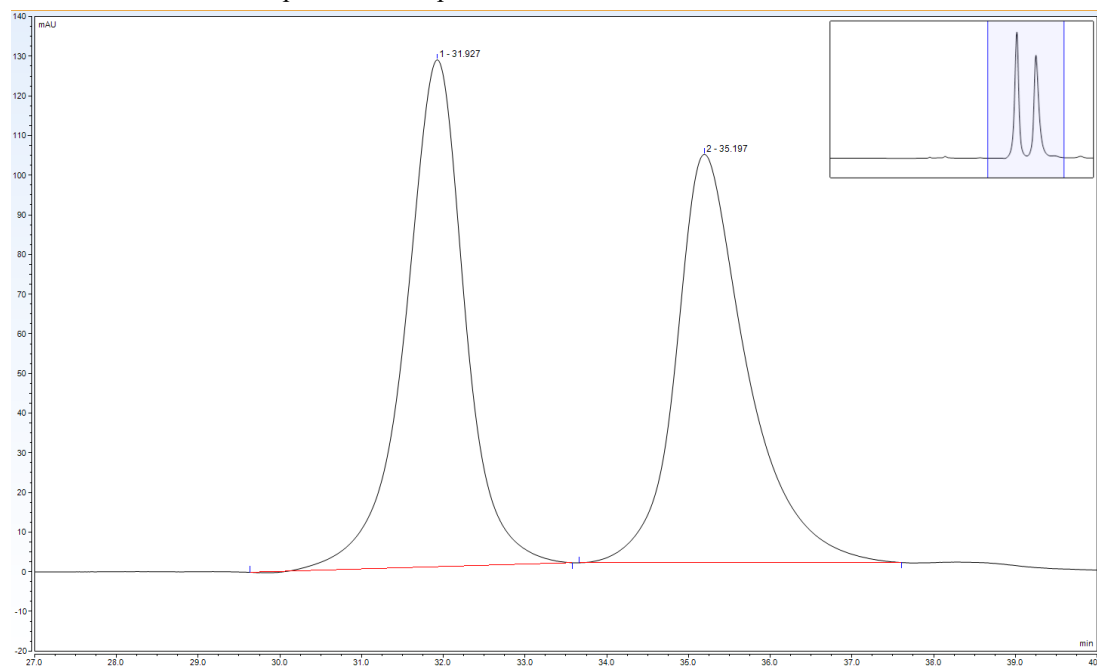

| Peak No. | Retention Time (RT), min | Area (AA), mAU*min | Relative Area, % |
|----------|--------------------------|--------------------|------------------|
| 1        | 31.927                   | 108.3441           | 51.06            |
| 2        | 35.197                   | 103.8379           | 48.94            |

$^1\text{H NMR}$  (300 MHz,  $\text{DMSO-}d_6$ ):  $\delta$  7.28 – 7.14 (m, 3H), 7.14 – 7.04 (m, 1H), 4.95 (s, 1H), 2.30 (s, 3H).  $^{13}\text{C}\{^1\text{H}\}$  NMR (75 MHz,  $\text{DMSO-}d_6$ ):  $\delta$  174.1, 140.1, 137.1, 128.2, 128.0, 127.2, 123.8, 72.4, 21.0; HRMS (ESI,  $[M-H]^-$ ) for  $\text{C}_9\text{H}_9\text{O}_3^-$  calcd 165.0557, found 165.0552.

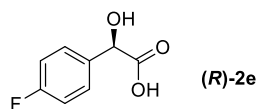

**(R)-(-)-2-(4-Fluorophenyl)-2-hydroxyacetic acid ((R)-2e).**<sup>5</sup> 4-Fluorophenyl glyoxal hydrate (**1e**· $\text{H}_2\text{O}$ , 100 mg, 0.59 mmol) was placed into a 250 mL glass flask and dissolved in sodium phosphate buffer (50 mM, pH = 7) with stirring and heating to obtain a 5 mM solution. The resulting solution was allowed to cool and was mixed with 690  $\mu\text{L}$  phosphate buffer solution containing glutathione, *E. coli* glyoxalase I and glyoxalase II (29.5  $\mu\text{mol}$ , 7.85 nmol and 2.45 nmol respectively). Upon completion of the reaction as was determined by monitoring the drop in the UV/vis absorbance at  $\lambda_{\text{max}} = 253$  nm the reaction mixture was acidified with a few drops of 12M HCl to pH = 2. The resulting mixture was extracted with ethyl acetate and the organic layer was dried over anhydrous sodium sulfate and concentrated in vacuo. The crude product was triturated with pentane to afford pure **(R)-2e** (100 mg, 0.59 mmol, 100%) as beige solid. **ee** = >99 % [UHPLC].  $[\alpha]^{27}_D = -139$  ( $c = 0.46$ , EtOAc). **mp**: 149-152 °C.

Chiral UHPLC chromatogram of (*R*)-(-)-2-(4-fluorophenyl)-2-hydroxyacetic acid (**(*R*)-2e**) obtained with 0.125 ml/min flow rate, 20°C column oven and sample holder temperature:

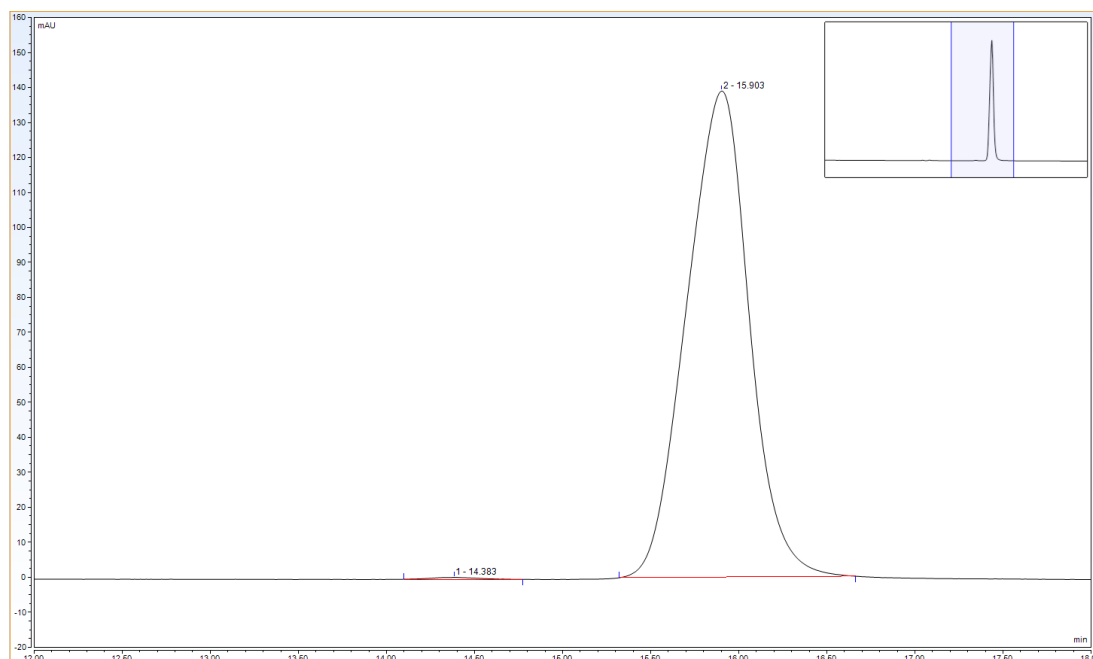

| Peak No. | Retention Time (RT), min | Area (AA), mAU*min | Relative Area, % |
|----------|--------------------------|--------------------|------------------|
| 1        | 14.383                   | 0.1725             | 0.30             |
| 2        | 15.903                   | 57.1343            | 99.70            |

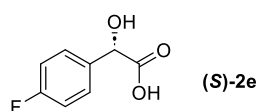

**(*S*)-(+)-2-(4-Fluorophenyl)-2-hydroxyacetic acid ((*S*)-2e).** 4-Fluorophenyl glyoxal hydrate (**1e·H<sub>2</sub>O**, 100 mg, 0.59 mmol) was placed into a 250 mL glass flask and dissolved in sodium phosphate buffer (50 mM, pH = 7) with stirring and heating to obtain a 5 mM solution. The resulting solution was allowed to cool and was mixed with 0.3 ml phosphate buffer solution containing 90 nmol DJ-1. Upon completion of the reaction as was determined by monitoring the drop in the UV/vis absorbance at  $\lambda_{\text{max}} = 253 \text{ nm}$  the reaction mixture was acidified with a few drops of 12M HCl to pH = 2. The resulting mixture was extracted with ethyl acetate and the organic layer was dried over anhydrous sodium sulfate and concentrated in vacuo. The crude product was triturated with pentane to afford pure **(*S*)-2e** (83 mg, 0.49 mmol, 83%) as white solid. *ee* = 99 % [UHPLC].  $[\alpha]_D^{27} = +146$  (*c* = 0.47, EtOAc). *mp*: 151-154 °C.

Chiral UHPLC chromatogram of (*S*)-(+)-2-(4-fluorophenyl)-2-hydroxyacetic acid (**(*S*)-2e**) obtained with 0.125 ml/min flow rate, 20°C column oven and sample holder temperature:

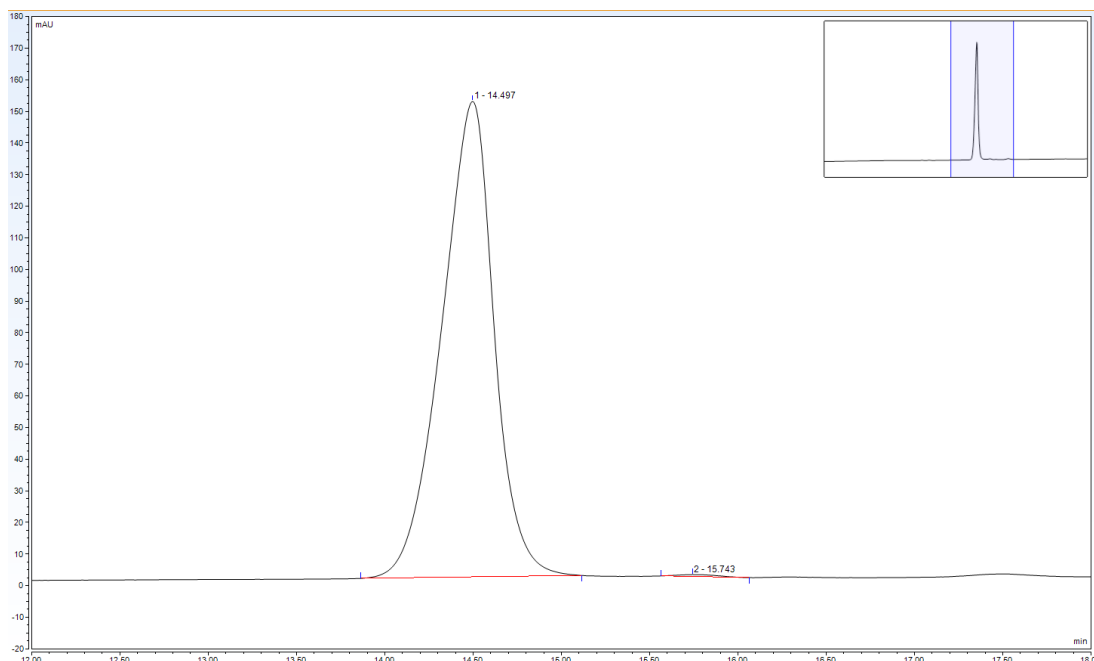

| Peak No. | Retention Time (RT), min | Area (AA), mAU*min | Relative Area, % |
|----------|--------------------------|--------------------|------------------|
| 1        | 14.497                   | 51.7746            | 99.69            |
| 2        | 15.743                   | 0.1626             | 0.31             |

Chiral UHPLC chromatogram of racemic 2-(4-fluorophenyl)-2-hydroxyacetic acid (**2e**) obtained with 0.125 ml/min flow rate, 20°C column oven and sample holder temperature:

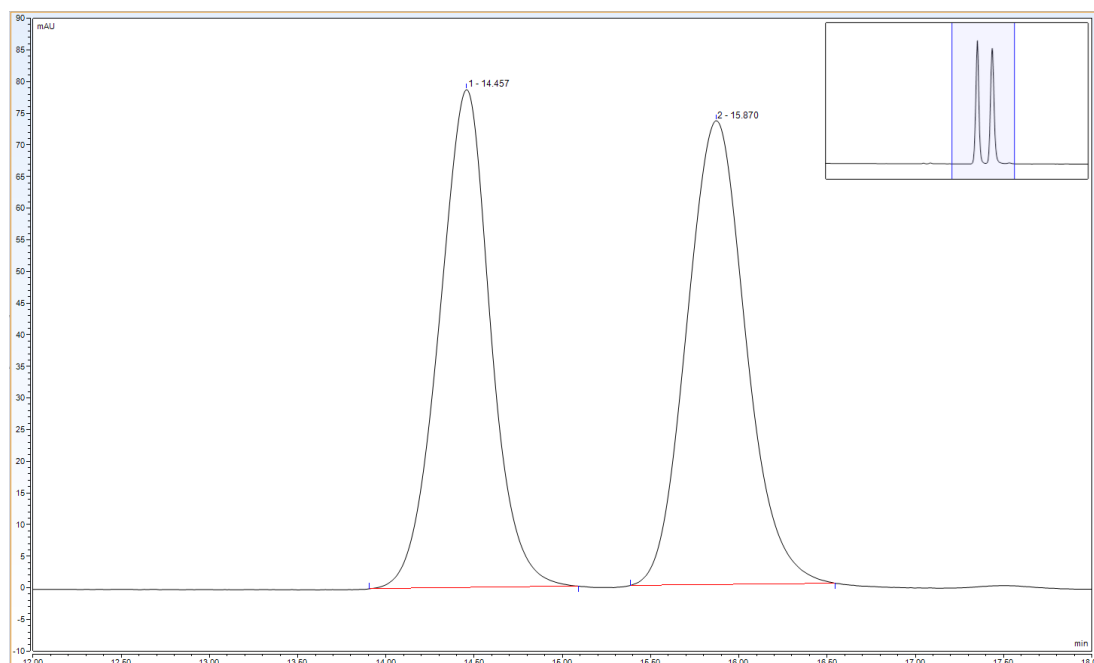

| Peak No. | Retention Time (RT), min | Area (AA), mAU*min | Relative Area, % |
|----------|--------------------------|--------------------|------------------|
| 1        | 14.457                   | 26.5929            | 48.32            |
| 2        | 15.87                    | 28.4396            | 51.68            |

**<sup>1</sup>H NMR (500 MHz, DMSO-*D*<sub>6</sub>):** δ 7.50 – 7.39 (m, 2H), 7.22 – 7.11 (m, 2H), 5.03 (s, 1H). **<sup>13</sup>C{<sup>1</sup>H} NMR (125 MHz, DMSO-*D*<sub>6</sub>):** δ 173.9, 161.6 (d, *J* = 243.2 Hz), 136.5 (d, *J* = 2.9 Hz), 128.6 (d, *J* = 8.2 Hz), 114.9 (d, *J* = 21.3 Hz), 71.8; **<sup>19</sup>F{<sup>1</sup>H} NMR (282 MHz, DMSO-*D*<sub>6</sub>):** δ -117.1 – (-117.5) (m). **HRMS (ESI, [M-H]<sup>-</sup>)** for C<sub>8</sub>H<sub>6</sub>FO<sub>3</sub><sup>-</sup> calcd 169.0306, found 169.0303.

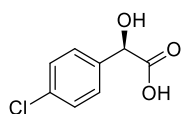

**(*R*)-2f**

**(*R*)-(-)-2-(4-Chlorophenyl)-2-hydroxyacetic acid ((*R*)-2f).**<sup>5</sup> 4-Chlorophenyl glyoxal hydrate (**1f**·H<sub>2</sub>O, 100 mg, 0.54 mmol) was placed into a 250 mL glass flask and dissolved in sodium phosphate buffer (50 mM, pH = 7) with stirring and heating to obtain a 5 mM solution. The resulting solution was allowed to cool and was mixed with 640 μl phosphate buffer solution containing glutathione, *E. coli* glyoxalase I and glyoxalase II (27 μmol, 7.85 nmol and 2.45 nmol respectively). Upon completion of the reaction as was determined by monitoring the drop in the UV/vis absorbance at λ<sub>max</sub> = 261 nm the reaction mixture was acidified with a few drops of 12M HCl to pH = 2. The resulting mixture was extracted with ethyl acetate and the organic layer was dried over anhydrous sodium sulfate and concentrated in vacuo. Column chromatography<sup>6</sup> with DCM/MeOH/HCOOH (9:1:0→9:1:0.02) as eluent followed by trituration with pentane afforded pure (*R*)-2f (88 mg, 0.47 mmol, 88%) as white solid. *ee* = 93 % [UHPLC]. [*α*]<sub>D</sub><sup>27</sup> = -130 (c = 0.35, EtOAc). *mp*: 117-120 °C.

Chiral UHPLC chromatogram of (*R*)-(-)-2-(4-chlorophenyl)-2-hydroxyacetic acid ((*R*)-2f) obtained with 0.125 ml/min flow rate, 20°C column oven and sample holder temperature:

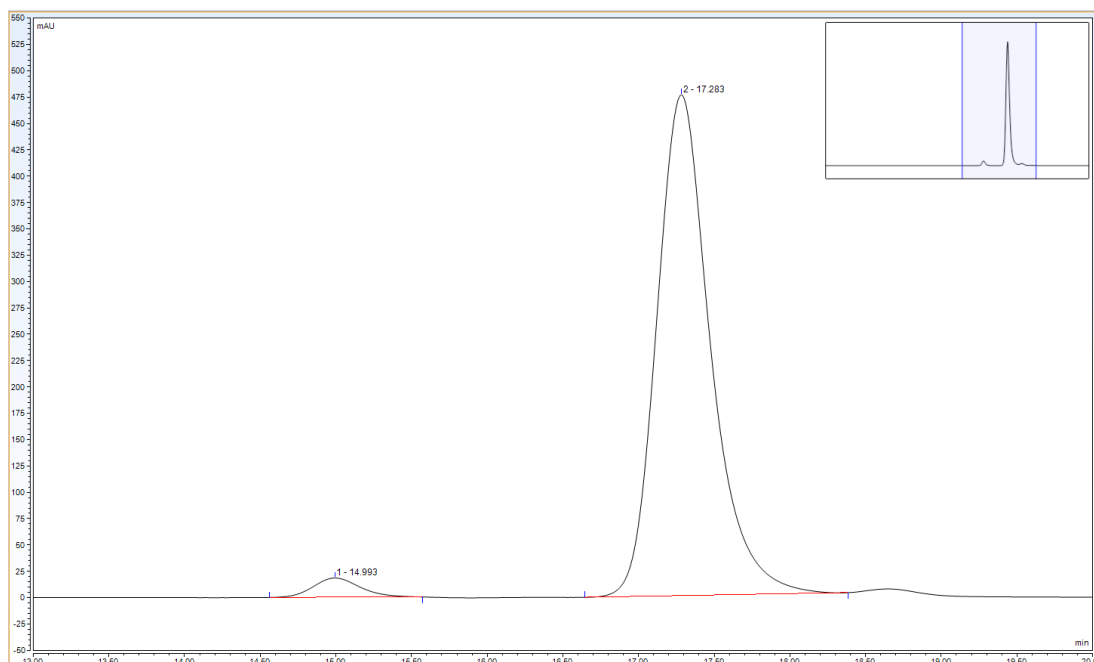

| Peak No. | Retention Time (RT), min | Area (AA), mAU*min | Relative Area, % |
|----------|--------------------------|--------------------|------------------|
| 1        | 14.993                   | 6.5459             | 3.24             |
| 2        | 17.283                   | 195.335            | 96.76            |

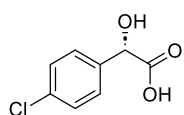

**(S)-2f**

**(S)-(+)-2-(4-Chlorophenyl)-2-hydroxyacetic acid ((S)-2f).** 4-Chlorophenyl glyoxal hydrate (**1f**·H<sub>2</sub>O, 100 mg, 0.54 mmol) was placed into a 250 mL glass flask and dissolved in sodium phosphate buffer (50 mM, pH = 7) with stirring and heating to obtain a 5 mM solution. The resulting solution was allowed to cool and was mixed with 0.184 ml phosphate buffer solution containing 200 nmol DJ-1. Upon completion of the reaction as was determined by monitoring the drop in the UV/vis absorbance at  $\lambda_{\text{max}} = 261$  nm the reaction mixture was acidified with a few drops of 12M HCl to pH = 2. The resulting mixture was extracted with ethyl acetate and the organic layer was dried over anhydrous sodium sulfate and concentrated in vacuo. Column chromatography<sup>6</sup> with DCM/MeOH/HCOOH (9:1:0→9:1:0.02) as eluent followed by trituration with pentane afforded pure **(S)-2f** (92 mg, 0.49 mmol, 92%) as white solid. *ee* = 97 % [UHPLC]. [ $\alpha$ ]<sub>D</sub><sup>27</sup> = +134 (c = 0.38, EtOAc). *mp*: 112-115 °C.

Chiral UHPLC chromatogram of (S)-(+)-2-(4-chlorophenyl)-2-hydroxyacetic acid (**(S)-2f**) obtained with 0.125 ml/min flow rate, 20°C column oven and sample holder temperature:

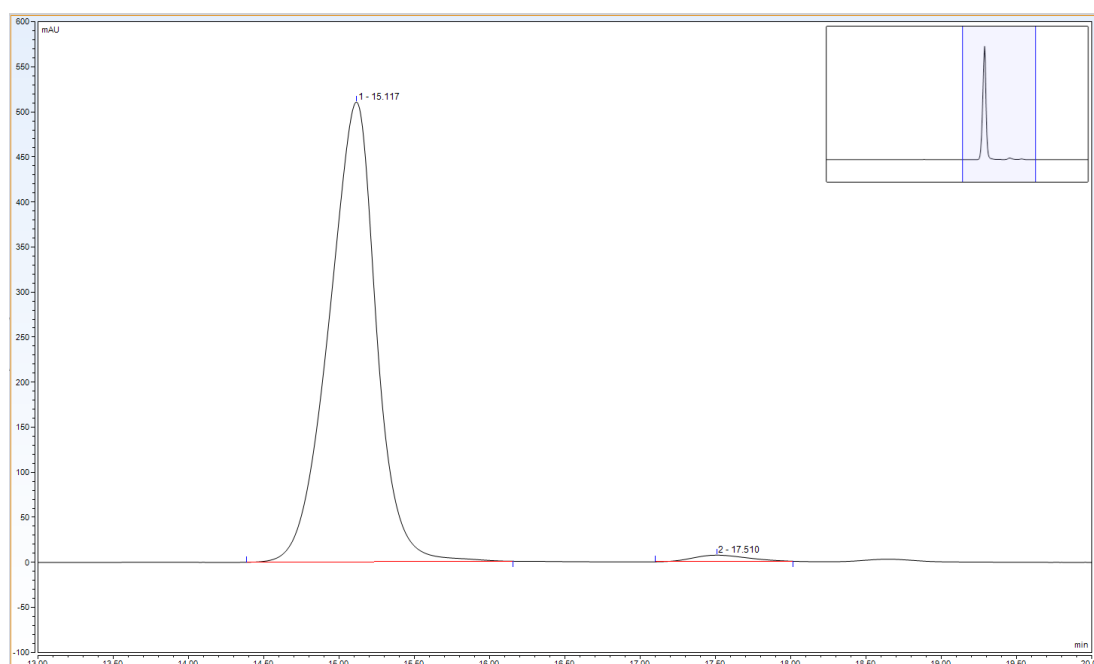

| Peak No. | Retention Time (RT), min | Area (AA), mAU*min | Relative Area, % |
|----------|--------------------------|--------------------|------------------|
| 1        | 15.117                   | 185.5444           | 98.43            |
| 2        | 17.51                    | 2.9609             | 1.57             |

Chiral UHPLC chromatogram of racemic 2-(4-chlorophenyl)-2-hydroxyacetic acid (**2f**) obtained with 0.125 ml/min flow rate, 20°C column oven and sample holder temperature:

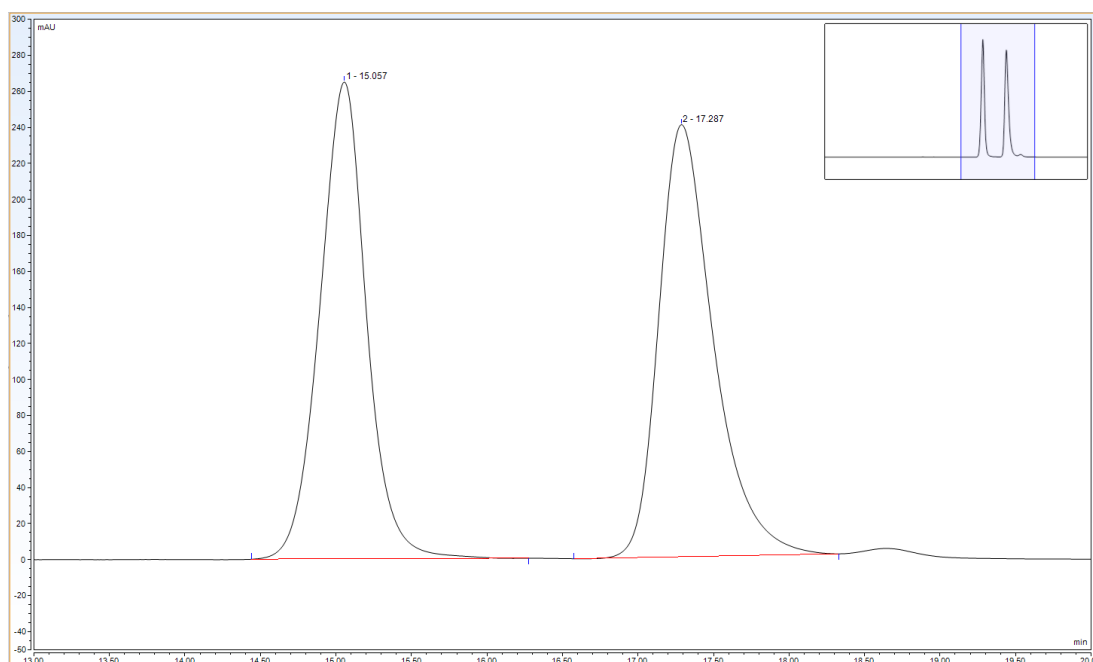

| Peak No. | Retention Time (RT), min | Area (AA), mAU*min | Relative Area, % |
|----------|--------------------------|--------------------|------------------|
| 1        | 15.057                   | 94.8104            | 48.50            |
| 2        | 17.287                   | 100.6816           | 51.50            |

$^1\text{H NMR}$  (300 MHz,  $\text{DMSO-}d_6$ ):  $\delta$  7.47 – 7.37 (m, 4H), 5.04 (s, 1H).  $^{13}\text{C}\{^1\text{H}\}$  NMR (75 MHz,  $\text{DMSO-}d_6$ ):  $\delta$  173.6, 139.2, 132.1, 128.4, 128.1, 71.6; **HRMS** (ESI,  $[M-H]^+$ ) for  $\text{C}_8\text{H}_6\text{ClO}_3^-$  calcd 185.0011, found 185.0012.

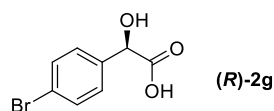

**(R)-(-)-2-(4-Bromophenyl)-2-hydroxyacetic acid ((R)-2g).**<sup>5</sup> 4-Bromophenyl glyoxal hydrate (**1g**· $\text{H}_2\text{O}$ , 100 mg, 0.43 mmol) was placed into a 250 mL glass flask and dissolved in sodium phosphate buffer (50 mM, pH = 7) with stirring and heating to obtain a 5 mM solution. The resulting solution was allowed to cool and was mixed with 530  $\mu\text{L}$  phosphate buffer solution containing glutathione, *E. coli* glyoxalase I and glyoxalase II (21.5  $\mu\text{mol}$ , 7.85 nmol and 2.45 nmol respectively). Upon completion of the reaction as was determined by monitoring the drop in the UV/vis absorbance at  $\lambda_{\text{max}} = 265$  nm the reaction mixture was acidified with a few drops of 12M HCl to pH = 2. The resulting mixture was extracted with ethyl acetate and the organic layer was dried over anhydrous sodium sulfate and concentrated in vacuo. The crude product was triturated with pentane to afford pure **(R)-2g** (95 mg, 0.41 mmol, 95%) as beige solid. *ee* = 90 % [UHPLC].  $[\alpha]_D^{27} = -101$  ( $c = 0.45$ , EtOAc). *mp*: 124–127 °C.

Chiral UHPLC chromatogram of (*R*)-(-)-2-(4-bromophenyl)-2-hydroxyacetic acid (**(*R*)-2g**) obtained with 0.8 ml/min flow rate, 30°C column oven and 5°C sample holder temperature:

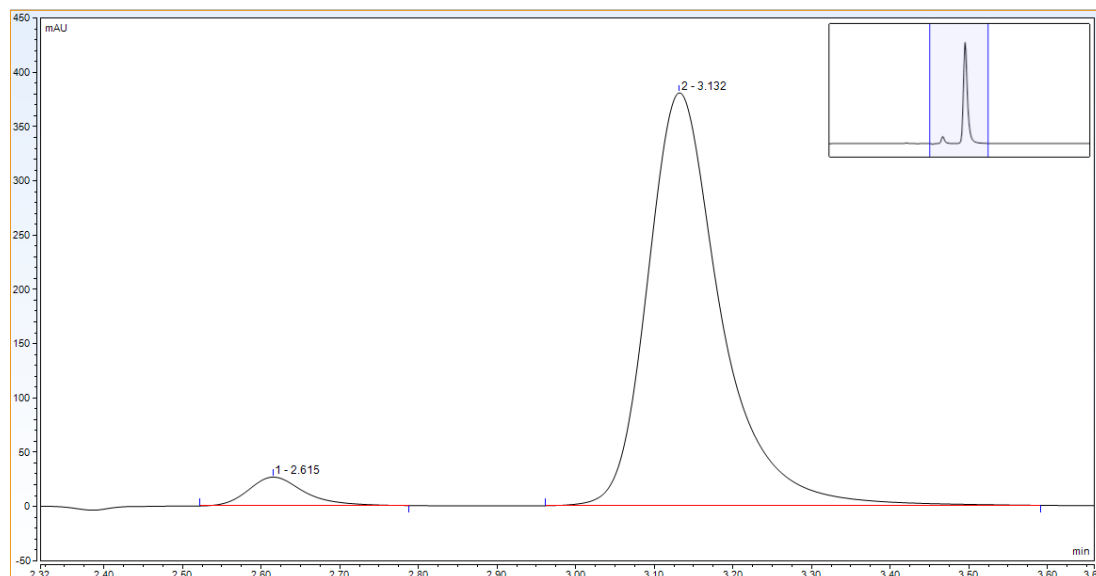

| Peak No. | Retention Time (RT), min | Area (AA), mAU*min | Relative Area, % |
|----------|--------------------------|--------------------|------------------|
| 1        | 2.615                    | 2.177              | 5.04             |
| 2        | 3.132                    | 41.050             | 94.96            |

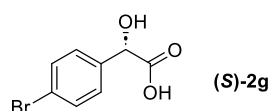

**(*S*)-(+)-2-(4-Bromophenyl)-2-hydroxyacetic acid ((*S*)-2g).** 4-Bromophenyl glyoxal hydrate (**1g·H<sub>2</sub>O**, 100 mg, 0.43 mmol) was placed into a 250 mL glass flask and dissolved in sodium phosphate buffer (50 mM, pH = 7) with stirring and heating to obtain a 5 mM solution. The resulting solution was allowed to cool and was mixed with 0.105 ml phosphate buffer solution containing 84 nmol DJ-1. Upon completion of the reaction as was determined by monitoring the drop in the UV/vis absorbance at  $\lambda_{\text{max}} = 265$  nm the reaction mixture was acidified with a few drops of 12M HCl to pH = 2. The resulting mixture was extracted with ethyl acetate and the organic layer was dried over anhydrous sodium sulfate and concentrated in vacuo. The crude product was triturated with pentane to afford pure **(*S*)-2g** (94 mg, 0.41 mmol, 94%) as beige solid. *ee* = 92 % [UHPLC].  $[\alpha]_D^{27} = +110$  (c = 0.4, EtOAc). *mp*: 126-129 °C.

Chiral UHPLC chromatogram of (*S*)-(+)-2-(4-bromophenyl)-2-hydroxyacetic acid (**(S)-2g**) obtained with 0.8 ml/min flow rate, 30°C column oven and 5°C sample holder temperature:

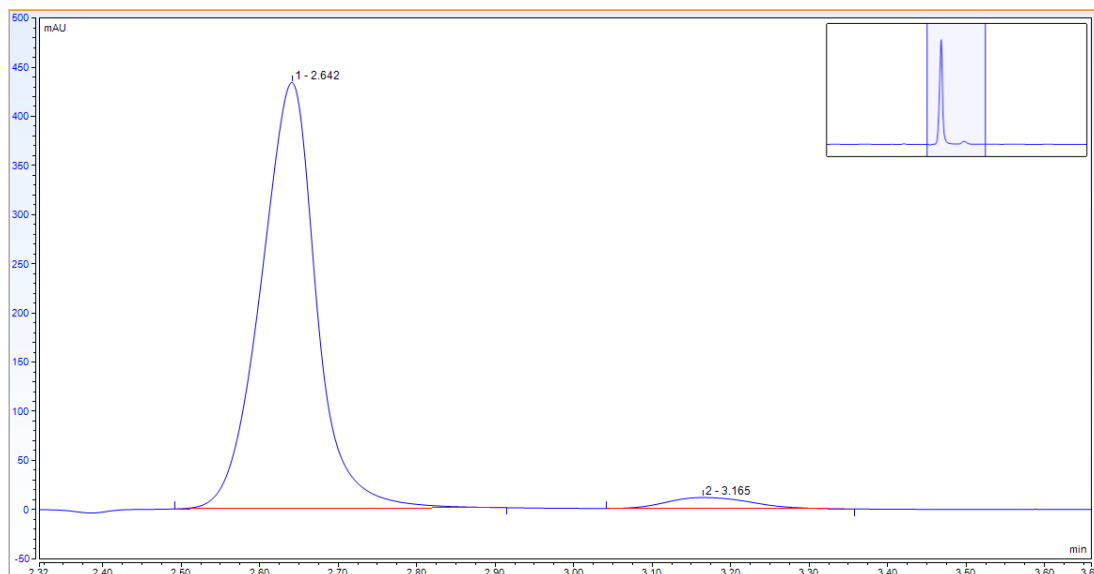

| Peak No. | Retention Time (RT), min | Area (AA), mAU*min | Relative Area, % |
|----------|--------------------------|--------------------|------------------|
| 1        | 2.642                    | 35.500             | 96.17            |
| 2        | 3.165                    | 1.414              | 3.83             |

Chiral UHPLC chromatogram of scalemic 2-(4-bromophenyl)-2-hydroxyacetic acid (**2g**) obtained with 0.8 ml/min flow rate, 30°C column oven and 5°C sample holder temperature:

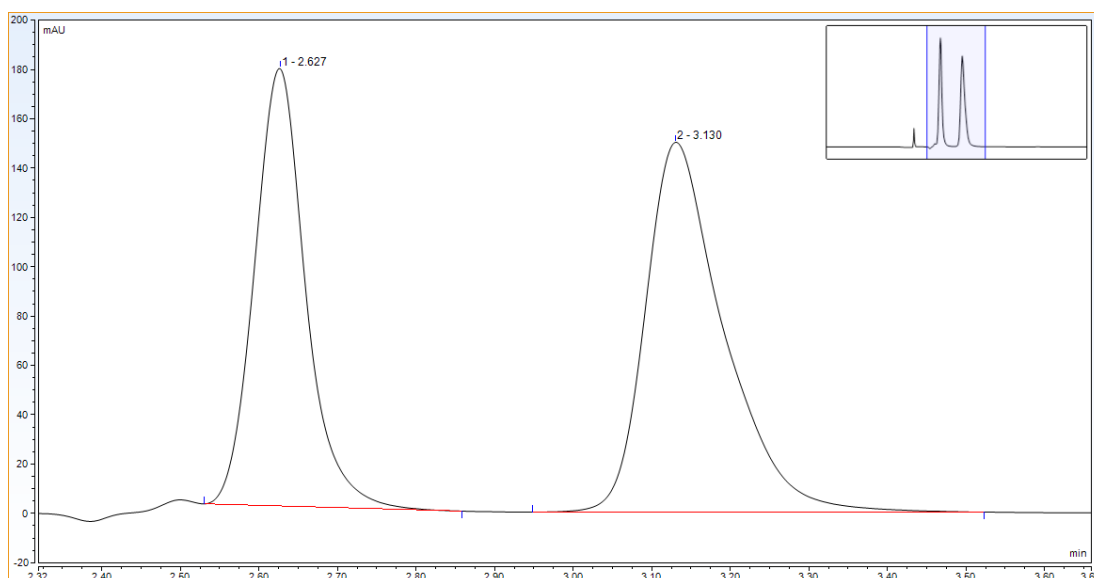

| Peak No. | Retention Time (RT), min | Area (AA), mAU*min | Relative Area, % |
|----------|--------------------------|--------------------|------------------|
| 1        | 2.627                    | 13.384             | 43.59            |
| 2        | 3.130                    | 17.318             | 56.41            |

$^1\text{H}$  NMR (300 MHz, DMSO-*D*<sub>6</sub>):  $\delta$  7.54 (d,  $J$  = 8.5 Hz, 2H), 7.37 (d,  $J$  = 8.3 Hz, 2H), 5.93 (bs, 1H), 5.03 (s, 1H).  
 $^{13}\text{C}\{^1\text{H}\}$  NMR (75 MHz, DMSO-*D*<sub>6</sub>):  $\delta$  173.6, 139.6, 131.0, 128.8, 120.7, 71.7; HRMS (ESI, [*M*-H]<sup>−</sup>) for C<sub>8</sub>H<sub>6</sub>BrO<sub>3</sub><sup>−</sup> calcd 228.9506, found 228.9504.

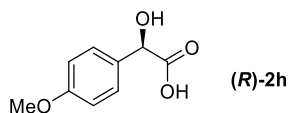

**(R)-(-)-2-Hydroxy-2-(4-methoxyphenyl)acetic acid ((R)-2h).**<sup>5</sup> 4-Methoxyphenyl glyoxal hydrate (**1h**·H<sub>2</sub>O, 100 mg, 0.55 mmol) was placed into a 250 mL glass flask and dissolved in sodium phosphate buffer (50 mM, pH = 7) with stirring and heating to obtain a 5 mM solution. The resulting solution was allowed to cool and was mixed with 650 µl phosphate buffer solution containing glutathione, *E. coli* glyoxalase I and glyoxalase II (27.5 µmol, 7.85 nmol and 2.45 nmol respectively). Upon completion of the reaction as was determined by monitoring the drop in the UV/vis absorbance at  $\lambda_{\text{max}} = 286$  nm the reaction mixture was acidified with a few drops of 12M HCl to pH = 2. The resulting mixture was extracted with ethyl acetate and the organic layer was dried over anhydrous sodium sulfate and concentrated in vacuo. Column chromatography<sup>6</sup> with DCM/MeOH/HCOOH (9:1:0.02) as eluent followed by trituration with pentane afforded pure **(R)-2h** (80 mg, 0.44 mmol, 80%) as white solid. *ee* = 95 % [HPLC].  $[\alpha]^{27}_D = -147$  (*c* = 0.5, EtOAc). *mp*: 101-103 °C.

Chiral UHPLC chromatogram of (R)-(-)-2-hydroxy-2-(4-methoxyphenyl)acetic acid (**(R)-2h**) obtained with 0.8 ml/min flow rate, 30°C column oven and 5°C sample holder temperature:

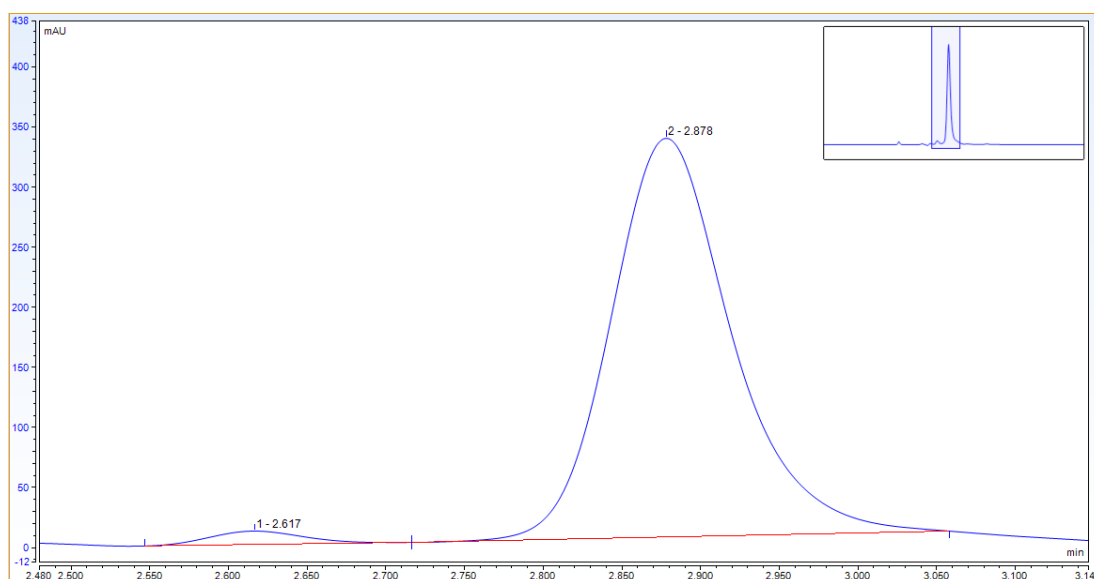

| Peak No. | Retention Time (RT), min | Area (AA), mAU*min | Relative Area, % |
|----------|--------------------------|--------------------|------------------|
| 1        | 2.617                    | 0.767              | 2.53             |
| 2        | 2.878                    | 29.533             | 97.47            |

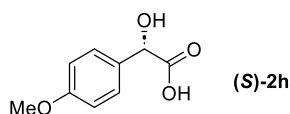

**(S)-(+)-2-Hydroxy-2-(4-methoxyphenyl)acetic acid ((S)-2h).** 4-Methoxyphenyl glyoxal hydrate (**1h**·H<sub>2</sub>O, 100 mg, 0.55 mmol) was placed into a 250 mL glass flask and dissolved in sodium phosphate buffer (50 mM, pH = 7) with stirring and heating to obtain a 5 mM solution. The resulting solution was allowed to cool and was mixed with 1.84 ml phosphate buffer solution containing 552 nmol DJ-1. Upon completion of the reaction as was determined by monitoring the drop in the UV/vis absorbance at  $\lambda_{\text{max}} = 286$  nm the reaction mixture was acidified with a few drops of 12M HCl to pH = 2. The resulting mixture was extracted with ethyl acetate and the organic layer was dried over anhydrous sodium sulfate and concentrated in vacuo. The crude product was trituated with pentane to afford pure **(S)-2h** (95 mg, 0.52 mmol, 95%) as white solid. *ee* = >99 % [UHPLC].  $[\alpha]^{27}_D = +147$  (*c* = 0.43, EtOAc). *mp*: 102-104 °C.

Chiral UHPLC chromatogram of (*S*)-(+)-2-hydroxy-2-(4-methoxyphenyl)acetic acid (**(S)-2h**) obtained with 0.8 ml/min flow rate, 30°C column oven and 5°C sample holder temperature:

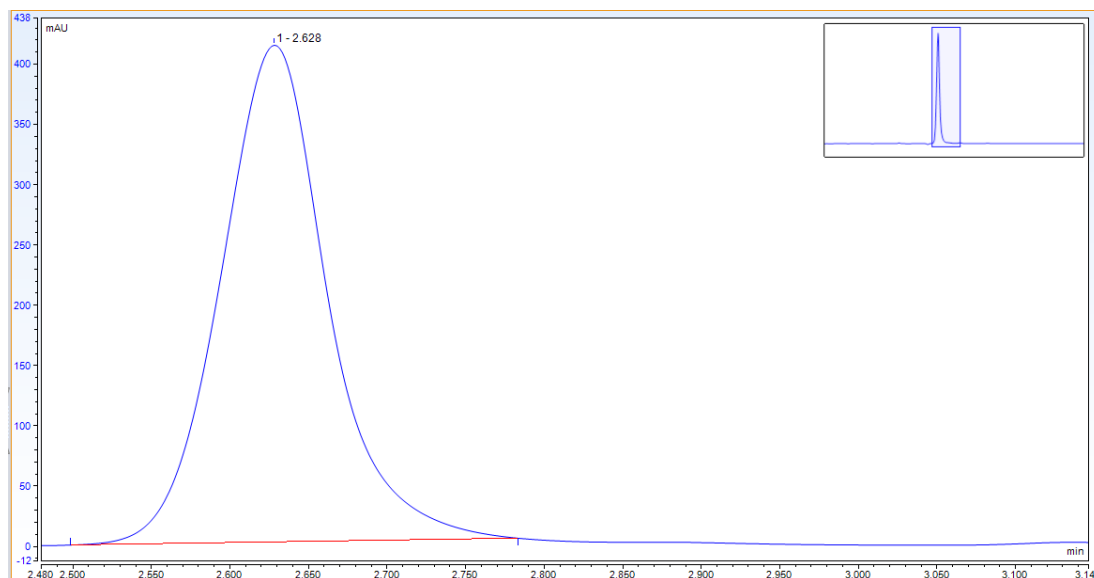

| Peak No. | Retention Time (RT), min | Area (AA), mAU*min | Relative Area, % |
|----------|--------------------------|--------------------|------------------|
| 1        | 2.628                    | 32.403             | 100.00           |

Chiral UHPLC chromatogram of nearly racemic 2-hydroxy-2-(4-methoxyphenyl)acetic acid (**2h**) obtained with 0.8 ml/min flow rate, 30°C column oven and 5°C sample holder temperature:

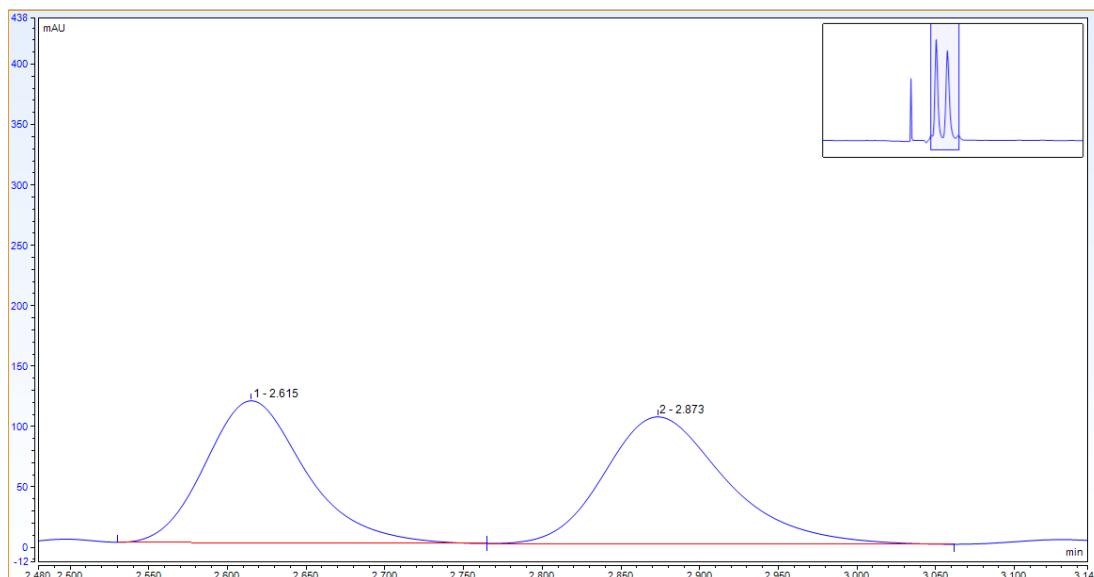

| Peak No. | Retention Time (RT), min | Area (AA), mAU*min | Relative Area, % |
|----------|--------------------------|--------------------|------------------|
| 1        | 2.615                    | 8.658              | 47.96            |
| 2        | 2.873                    | 9.394              | 52.04            |

<sup>1</sup>H NMR (300 MHz, DMSO-D<sub>6</sub>): δ 7.32 (d, *J* = 8.6 Hz, 2H), 6.89 (d, *J* = 8.8 Hz, 2H), 4.94 (s, 1H), 3.74 (s, 3H).  
<sup>13</sup>C{<sup>1</sup>H} NMR (75 MHz, DMSO-D<sub>6</sub>): δ 174.3, 158.8, 132.3, 127.8, 113.5, 71.9, 55.1; HRMS (ESI, [M-H]<sup>-</sup>) for C<sub>9</sub>H<sub>9</sub>O<sub>4</sub><sup>-</sup> calcd 181.0506, found 181.0504.

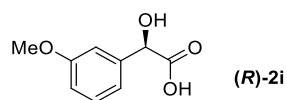

**(R)-2i**

**(R)-(-)-2-Hydroxy-2-(3-methoxyphenyl)acetic acid ((R)-2i).**<sup>5</sup> 3-Methoxyphenyl glyoxal hydrate (**1i**·H<sub>2</sub>O, 100 mg, 0.55 mmol) was placed into a 250 mL glass flask and dissolved in sodium phosphate buffer (50 mM, pH = 7) with stirring and heating to obtain a 5 mM solution. The resulting solution was allowed to cool and was mixed with 650 µl phosphate buffer solution containing glutathione, *E. coli* glyoxalase I and glyoxalase II (27.5 µmol, 7.85 nmol and 2.45 nmol respectively). Upon completion of the reaction as was determined by monitoring the drop in the UV/vis absorbance at  $\lambda_{\text{max}} = 257$  nm the reaction mixture was acidified with a few drops of 12M HCl to pH = 2. The resulting mixture was extracted with ethyl acetate and the organic layer was dried over anhydrous sodium sulfate and concentrated in vacuo. The crude product was triturated with pentane to afford pure **(R)-2i** (96 mg, 0.53 mmol, 96%) as beige solid. *ee* = 99 % [UHPLC].  $[\alpha]_D^{27} = -117$  (*c* = 0.5, EtOAc). *mp*: 77-80 °C.

Chiral UHPLC chromatogram of *(R)*-(-)-2-hydroxy-2-(3-methoxyphenyl)acetic acid (**(R)-2i**) obtained with 0.125 ml/min flow rate, 5°C column oven and 20°C sample holder temperature:

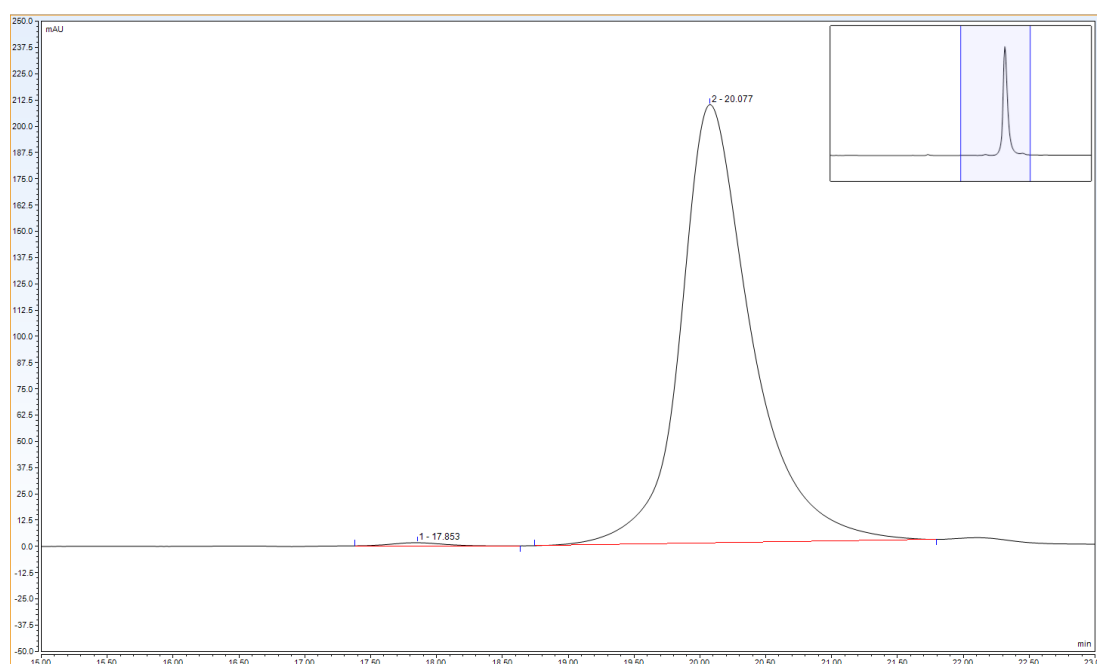

| Peak No. | Retention Time (RT), min | Area (AA), mAU*min | Relative Area, % |
|----------|--------------------------|--------------------|------------------|
| 1        | 17.853                   | 0.6533             | 0.50             |
| 2        | 20.077                   | 130.7776           | 99.50            |

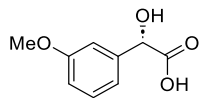

**(S)-2i**

**(S)-(+)-2-Hydroxy-2-(3-methoxyphenyl)acetic acid ((S)-2i).** 3-Methoxyphenyl glyoxal hydrate (**1i**·H<sub>2</sub>O, 100 mg, 0.55 mmol) was placed into a 250 mL glass flask and dissolved in sodium phosphate buffer (50 mM, pH = 7) with stirring and heating to obtain a 5 mM solution. The resulting solution was allowed to cool and was mixed with 3 ml phosphate buffer solution containing 2.55 µmol DJ-1. Upon completion of the reaction as was determined by monitoring the drop in the UV/vis absorbance at  $\lambda_{\text{max}} = 257$  nm the reaction mixture was acidified with a few drops of 12M HCl to pH = 2. The resulting mixture was extracted with ethyl acetate and the organic layer was dried over anhydrous sodium sulfate and concentrated in vacuo. Column chromatography<sup>6</sup> with DCM/MeOH/HCOOH (9:1:0.02) as eluent followed by trituration with pentane afforded pure **(S)-2i** (71 mg, 0.39 mmol, 71%) as beige solid. *ee* = 96 % [HPLC].  $[\alpha]_D^{27} = +114$  (*c* = 0.34, EtOAc). *mp*: 76-79 °C.

Chiral UHPLC chromatogram of (*S*)-(+)-2-hydroxy-2-(3-methoxyphenyl)acetic acid (**(S)-2i**) obtained with 0.125 ml/min flow rate, 5°C column oven and 20°C sample holder temperature:

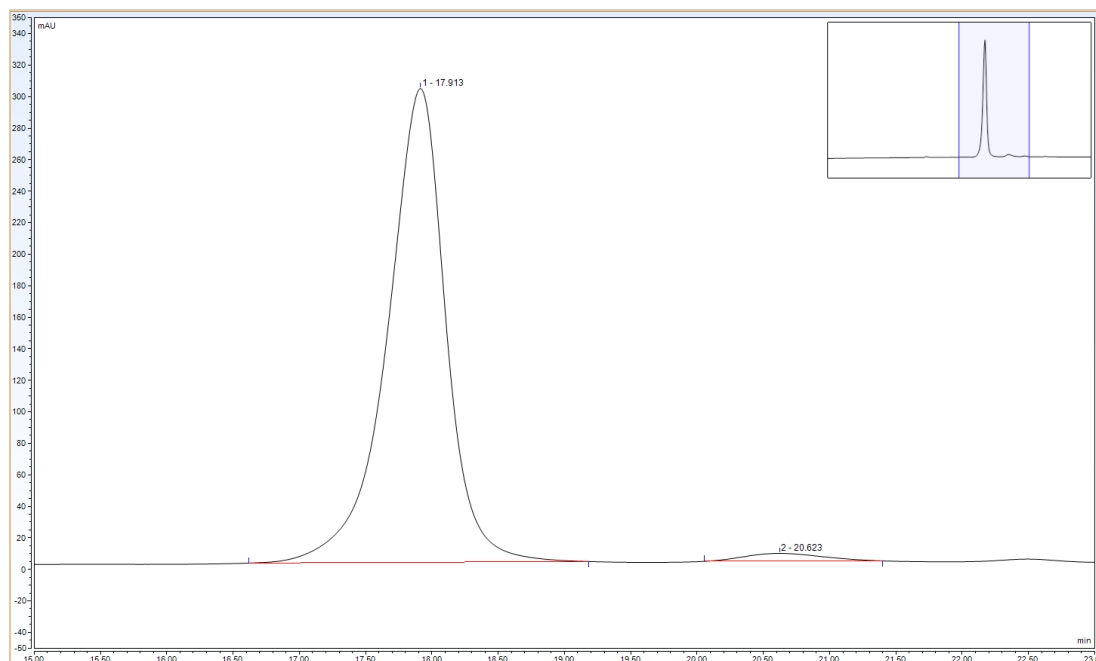

| Peak No. | Retention Time (RT), min | Area (AA), mAU*min | Relative Area, % |
|----------|--------------------------|--------------------|------------------|
| 1        | 17.913                   | 153.6581           | 97.87            |
| 2        | 20.623                   | 3.3425             | 2.13             |

Chiral UHPLC chromatogram of nearly racemic 2-hydroxy-2-(3-methoxyphenyl)acetic acid (**2i**) obtained with 0.125 ml/min flow rate, 5°C column oven and 20°C sample holder temperature:

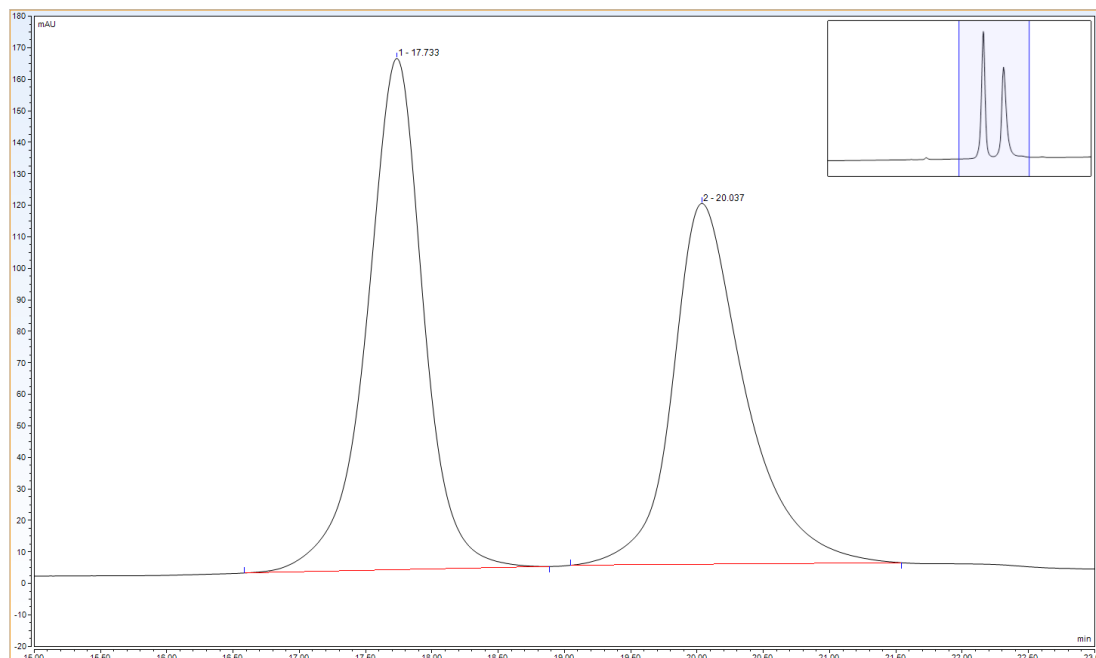

| Peak No. | Retention Time (RT), min | Area (AA), mAU*min | Relative Area, % |
|----------|--------------------------|--------------------|------------------|
| 1        | 17.733                   | 80.6437            | 52.63            |
| 2        | 20.037                   | 72.5983            | 47.37            |

**<sup>1</sup>H NMR (300 MHz, DMSO-*D*<sub>6</sub>):** δ 7.30 – 7.18 (m, 1H), 7.05 – 6.90 (m, 2H), 6.89 – 6.78 (m, 1H), 5.82 (bs, 1H), 4.99 (s, 1H), 3.74 (s, 3H). **<sup>13</sup>C{<sup>1</sup>H} NMR (75 MHz, DMSO-*D*<sub>6</sub>):** δ 173.9, 159.1, 141.7, 129.1, 118.9, 113.0, 112.2, 72.3, 55.0; **HRMS (ESI, [M-H]<sup>-</sup>)** for C<sub>9</sub>H<sub>9</sub>O<sub>4</sub><sup>-</sup> calcd 181.0506, found 181.0505.

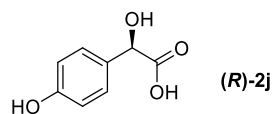

**(*R*)-(-)-2-Hydroxy-2-(4-hydroxyphenyl)acetic acid ((*R*)-2j).** 4-Hydroxyphenyl glyoxal hydrate (**1j**·H<sub>2</sub>O, 100 mg, 0.59 mmol) was placed into a 250 mL glass flask and dissolved in sodium phosphate buffer (50 mM, pH = 7) with stirring and heating to obtain a 5 mM solution. The resulting solution was allowed to cool and was mixed with 690 μl phosphate buffer solution containing glutathione, *E. coli* glyoxalase I and glyoxalase II (29.5 μmol, 7.85 nmol and 2.45 nmol respectively). Upon completion of the reaction as was determined by monitoring the drop in the UV/vis absorbance at λ<sub>max</sub> = 286 nm the reaction mixture was acidified with a few drops of 12M HCl to pH = 2. The resulting mixture was extracted with ethyl acetate and the organic layer was dried over anhydrous sodium sulfate and concentrated in vacuo. Column chromatography<sup>6</sup> with DCM/MeOH/HCOOH (9:1:0.02) as eluent followed by trituration with pentane afforded pure **(*R*)-2j** (55 mg, 0.33 mmol, 55%) as white solid. *ee* = 98 % [HPLC]. [*α*]<sub>D</sub><sup>27</sup> = -139 (c = 0.33, MeOH). *mp*: 103-106 °C. Chiral UHPLC chromatogram of (*R*)-(-)-2-hydroxy-2-(4-hydroxyphenyl)acetic acid (**(*R*)-2j**) obtained with 0.07 ml/min flow rate, 5°C column oven and 20°C sample holder temperature:

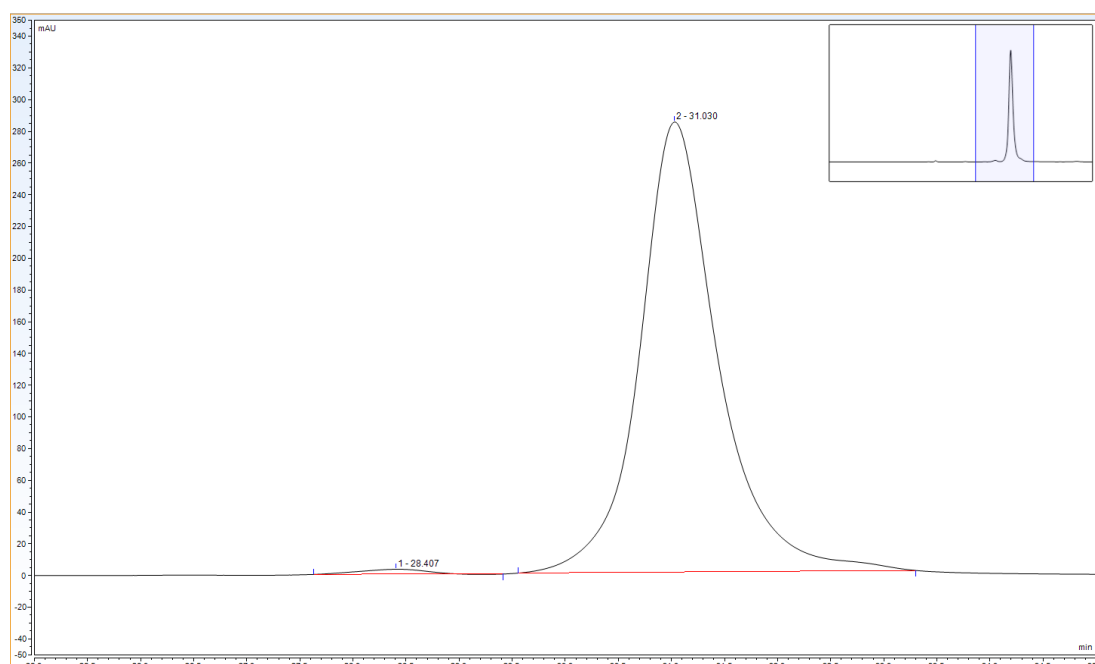

| Peak No. | Retention Time (RT), min | Area (AA), mAU*min | Relative Area, % |
|----------|--------------------------|--------------------|------------------|
| 1        | 28.407                   | 2.2138             | 0.90             |
| 2        | 31.03                    | 242.7675           | 99.10            |

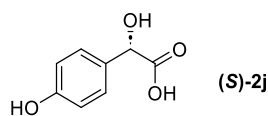

**(S)-(+)-2-Hydroxy-2-(4-hydroxyphenyl)acetic acid ((S)-2j).** 4-Hydroxyphenyl glyoxal hydrate (**1j**·H<sub>2</sub>O, 100 mg, 0.59 mmol) was placed into a 250 mL glass flask and dissolved in sodium phosphate buffer (50 mM, pH = 7) with stirring and heating to obtain a 5 mM solution. The resulting solution was allowed to cool and was mixed with 5 ml phosphate buffer solution containing 2.8 μmol DJ-1. Upon completion of the reaction as was determined by monitoring the drop in the UV/vis absorbance at  $\lambda_{\text{max}} = 286 \text{ nm}$  the reaction mixture was acidified with a few drops of 12M HCl to pH = 2. The resulting mixture was extracted with ethyl acetate and the organic layer was dried over anhydrous sodium sulfate and concentrated in vacuo. Column chromatography<sup>6</sup> with DCM/MeOH/HCOOH (9:1:0.02) as eluent followed by trituration with pentane afforded pure **(S)-2j** (56 mg, 0.33 mmol, 56%) as beige solid. *ee* = >99 % [HPLC].  $[\alpha]_D^{27} = +143$  (*c* = 0.34, MeOH). *mp*: 103–106 °C.

Chiral UHPLC chromatogram of (S)-(+)-2-hydroxy-2-(4-hydroxyphenyl)acetic acid (**(S)-2j**) obtained with 0.07 ml/min flow rate, 5°C column oven and 20°C sample holder temperature:

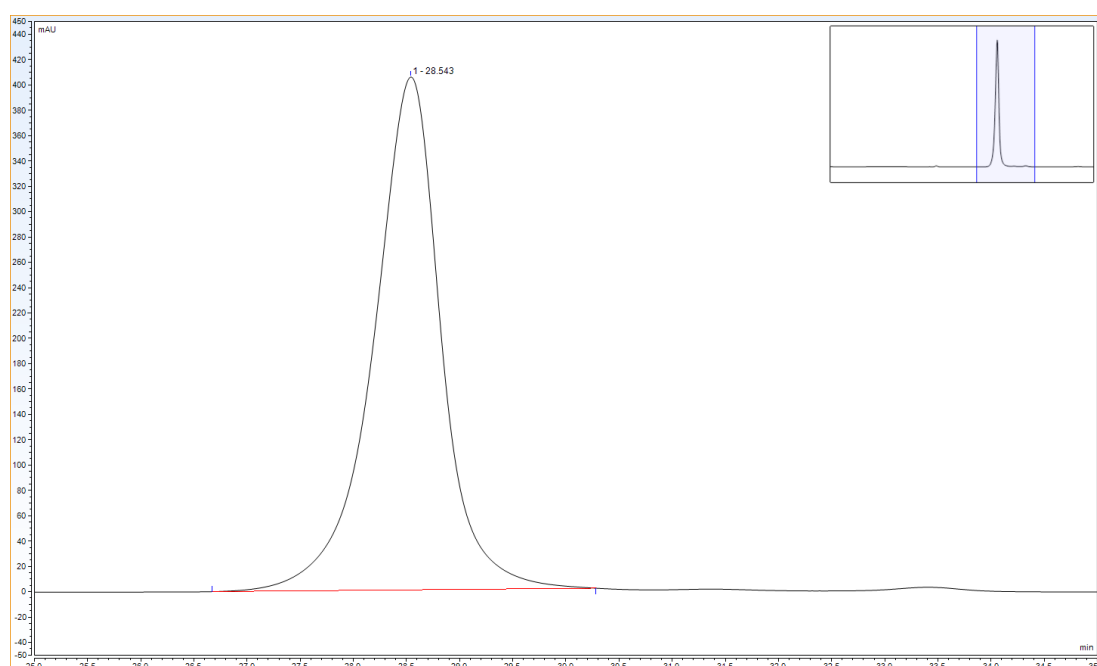

| Peak No. | Retention Time (RT), min | Area (AA), mAU*min | Relative Area, % |
|----------|--------------------------|--------------------|------------------|
| 1        | 28.543                   | 298.6673           | 100.00           |

Chiral UHPLC chromatogram of scalemic 2-hydroxy-2-(4-hydroxyphenyl)acetic acid (**2j**) obtained with 0.07 ml/min flow rate, 5°C column oven and 20°C sample holder temperature:

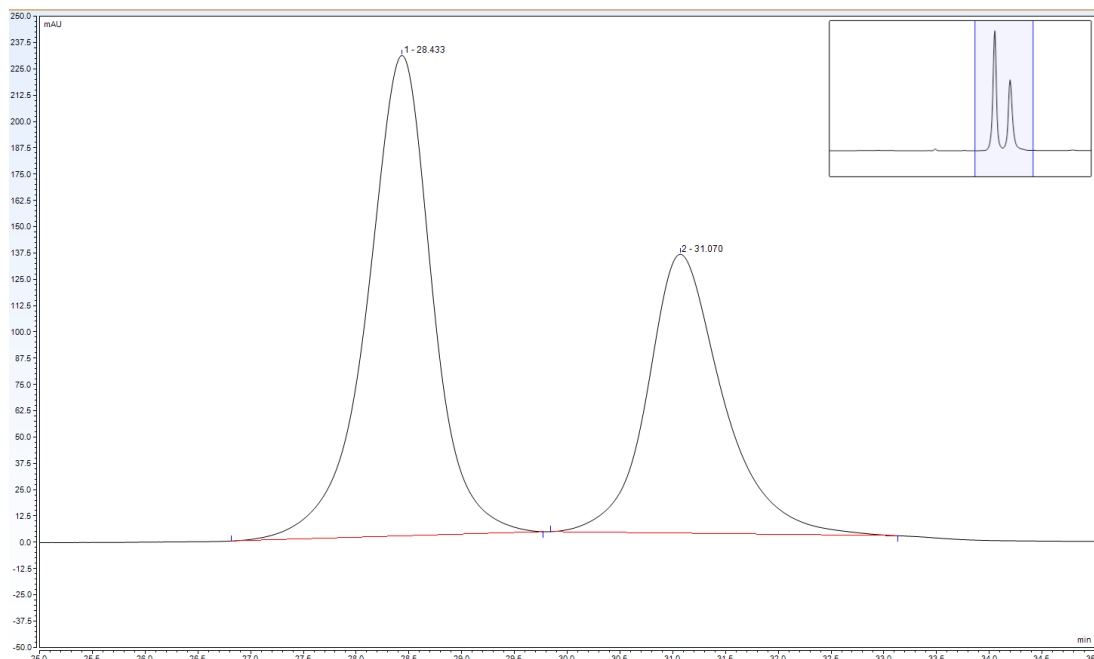

| Peak No. | Retention Time (RT), min | Area (AA), mAU*min | Relative Area, % |
|----------|--------------------------|--------------------|------------------|
| 1        | 28.433                   | 163.3574           | 59.69            |
| 2        | 31.07                    | 110.3318           | 40.31            |

$^1\text{H}$  NMR (300 MHz,  $\text{DMSO}-d_6$ ):  $\delta$  9.32 (bs, 1H), 7.18 (d,  $J$  = 8.4 Hz, 2H), 6.70 (d,  $J$  = 8.4 Hz, 2H), 4.83 (s, 1H).  
 $^{13}\text{C}\{^1\text{H}\}$  NMR (75 MHz,  $\text{DMSO}-d_6$ ):  $\delta$  174.4, 156.9, 130.6, 127.9, 114.8, 72.0; HRMS (ESI,  $[M-H]^-$ ) for  $\text{C}_8\text{H}_7\text{O}_4^-$  calcd 167.0350, found 167.0348.

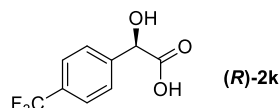

**(R)-(-)-2-Hydroxy-2-(4-(trifluoromethyl)phenyl)acetic acid ((R)-2k).**<sup>5</sup>

4-(Trifluoromethyl)phenyl glyoxal hydrate (**1k**· $\text{H}_2\text{O}$ , 100 mg, 0.45 mmol) was placed into a 250 mL glass flask and dissolved in sodium phosphate buffer (50 mM, pH = 7) with stirring and heating to obtain a 5 mM solution. The resulting solution was allowed to cool and was mixed with 550  $\mu\text{L}$  phosphate buffer solution containing glutathione, *E. coli* glyoxalase I and glyoxalase II (22.5  $\mu\text{mol}$ , 7.85 nmol and 2.45 nmol respectively). Upon completion of the reaction as was determined by monitoring the drop in the UV/vis absorbance at  $\lambda_{\text{max}}$  = 243 nm the reaction mixture was acidified with a few drops of 12M HCl to pH = 2. The resulting mixture was extracted with ethyl acetate and the organic layer was dried over anhydrous sodium sulfate and concentrated in vacuo. The crude product was triturated with cold pentane to afford pure **(R)-2k** (91 mg, 0.41 mmol, 91%) as beige solid.  $ee$  = 98 % [UHPLC].  $[\alpha]_D^{27} = -99$  ( $c$  = 0.36, EtOAc).  $mp$ : 135-138 °C.

Chiral UHPLC chromatogram of (*R*)-(-)-2-hydroxy-2-(4-(trifluoromethyl)phenyl)acetic acid (**(R)-2k**) obtained with 0.125 ml/min flow rate, 20°C column oven and sample holder temperature:

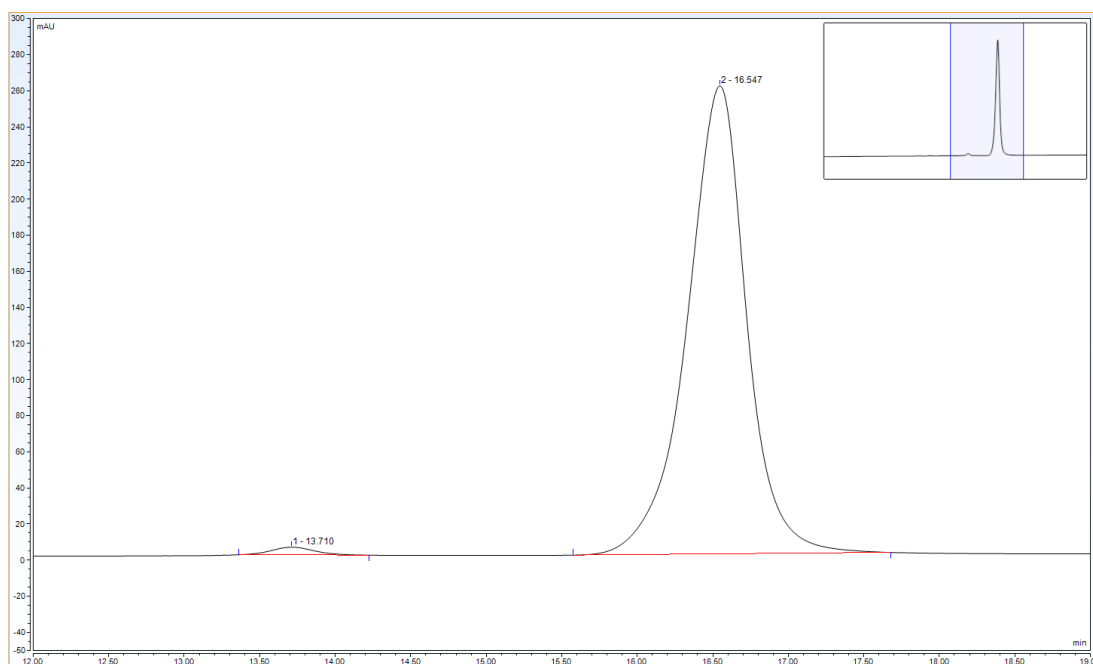

| Peak No. | Retention Time (RT), min | Area (AA), mAU*min | Relative Area, % |
|----------|--------------------------|--------------------|------------------|
| 1        | 13.71                    | 1.424              | 1.19             |
| 2        | 16.547                   | 118.3575           | 98.81            |

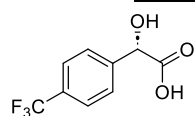

**(S)-(+)-2-Hydroxy-2-(4-(trifluoromethyl)phenyl)acetic acid ((S)-2k).**

**(S)-2k** 4-(Trifluoromethyl)phenyl glyoxal hydrate (**1k·H<sub>2</sub>O**, 100 mg, 0.45 mmol) was placed into a 250 mL glass flask and dissolved in sodium phosphate buffer (50 mM, pH = 7) with stirring and heating to obtain a 5 mM solution. The resulting solution was allowed to cool and was mixed with 0.553 ml phosphate buffer solution containing 602 nmol DJ-1. Upon completion of the reaction as was determined by monitoring the drop in the UV/vis absorbance at  $\lambda_{\text{max}} = 243$  nm the reaction mixture was acidified with a few drops of 12M HCl to pH = 2. The resulting mixture was extracted with ethyl acetate and the organic layer was dried over anhydrous sodium sulfate and concentrated in vacuo. Column chromatography<sup>6</sup> with DCM/MeOH/HCOOH (9:1:0→9:1:0.02) as eluent followed by trituration with cold pentane afforded pure **(S)-2k** (83 mg, 0.38 mmol, 83%) as white solid. *ee* = 96 % [UHPLC].  $[\alpha]_D^{27} = +105$  (c = 0.38, EtOAc). *mp*: 140-143 °C.

Chiral UHPLC chromatogram of (*S*)-(+)-2-hydroxy-2-(4-(trifluoromethyl)phenyl)acetic acid (**(*S*)-2k**) obtained with 0.125 ml/min flow rate, 20°C column oven and sample holder temperature:

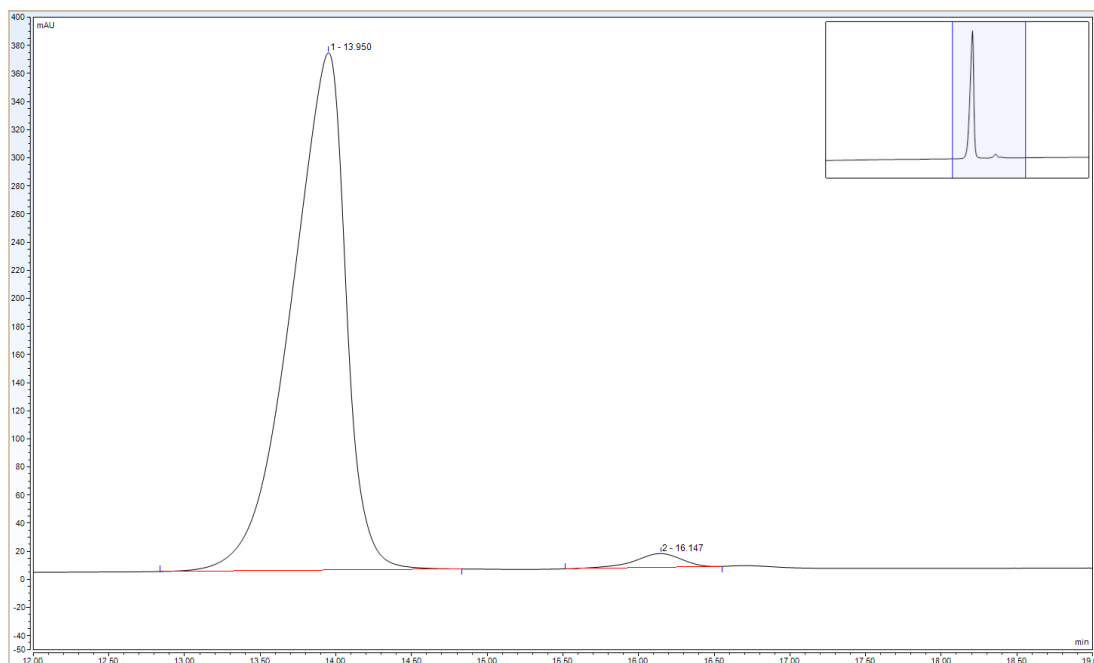

| Peak No. | Retention Time (RT), min | Area (AA), mAU*min | Relative Area, % |
|----------|--------------------------|--------------------|------------------|
| 1        | 13.95                    | 154.1043           | 97.76            |
| 2        | 16.147                   | 3.5251             | 2.24             |

Chiral UHPLC chromatogram of nearly racemic 2-hydroxy-2-(4-(trifluoromethyl)phenyl)acetic acid (**2k**) obtained with 0.125 ml/min flow rate, 20°C column oven and sample holder temperature:

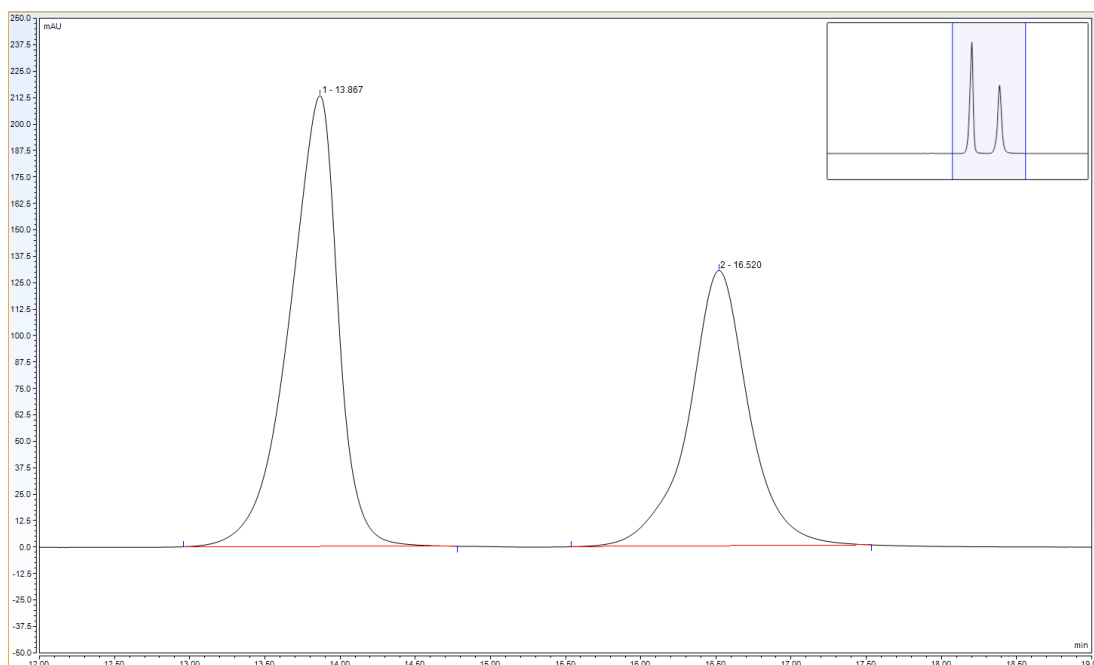

| Peak No. | Retention Time (RT), min | Area (AA), mAU*min | Relative Area, % |
|----------|--------------------------|--------------------|------------------|
| 1        | 13.867                   | 80.3479            | 57.16            |
| 2        | 16.52                    | 60.2265            | 42.84            |

**<sup>1</sup>H NMR (300 MHz, DMSO-*D*<sub>6</sub>):** δ 7.71 (d, *J* = 8.3 Hz, 2H), 7.64 (d, *J* = 8.3 Hz, 2H), 5.14 (s, 1H). **<sup>13</sup>C{<sup>1</sup>H} NMR (75 MHz, DMSO-*D*<sub>6</sub>):** δ 173.4, 144.9, 128.2 (q, *J* = 31.7 Hz), 127.3, 125.0 (q, *J* = 3.8 Hz), 124.2 (q, *J* = 271.9 Hz), 71.8; **<sup>19</sup>F{<sup>1</sup>H} NMR (282 MHz, DMSO-*D*<sub>6</sub>):** δ -63.2 (s). **HRMS (ESI, [*M*-H]<sup>-</sup>)** for C<sub>9</sub>H<sub>6</sub>F<sub>3</sub>O<sub>3</sub><sup>-</sup> calcd 219.0275, found 219.0273.

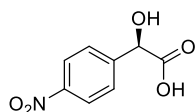

**(*R*)-2I**

**(*R*)-(-)-2-Hydroxy-2-(4-nitrophenyl)acetic acid ((*R*)-2I).**<sup>5</sup> 4-Nitrophenyl glyoxal hydrate (**1I·H<sub>2</sub>O**, 100 mg, 0.51 mmol) was placed into a 250 mL glass flask and dissolved in sodium phosphate buffer (50 mM, pH = 7) with stirring and heating to obtain a 5 mM solution. The resulting solution was allowed to cool and was mixed with 610 μl phosphate buffer solution containing glutathione, *E. coli* glyoxalase I and glyoxalase II (25.5 μmol, 7.85 nmol and 2.45 nmol respectively). Upon completion of the reaction as was determined by monitoring the shift in the UV/vis absorbance maximum to λ<sub>max, product</sub> = 280 nm the reaction mixture was acidified with a few drops of 12M HCl to pH = 2. The resulting mixture was extracted with ethyl acetate and the organic layer was dried over anhydrous sodium sulfate and concentrated in vacuo. Column chromatography<sup>6</sup> with DCM/MeOH/HCOOH (9:1:0.02) as eluent followed by trituration with pentane afforded pure (*R*)-2I (82 mg, 0.42 mmol, 82%) as orange solid. *ee* = 96 % [UHPLC]. [*α*]<sub>D</sub><sup>27</sup> = -117 (c = 0.26, MeOH). *mp*: 74-78 °C.

Chiral UHPLC chromatogram of (*R*)-(-)-2-hydroxy-2-(4-nitrophenyl)acetic acid ((*R*)-2I) obtained with 0.125 ml/min flow rate, 20°C column oven and sample holder temperature:

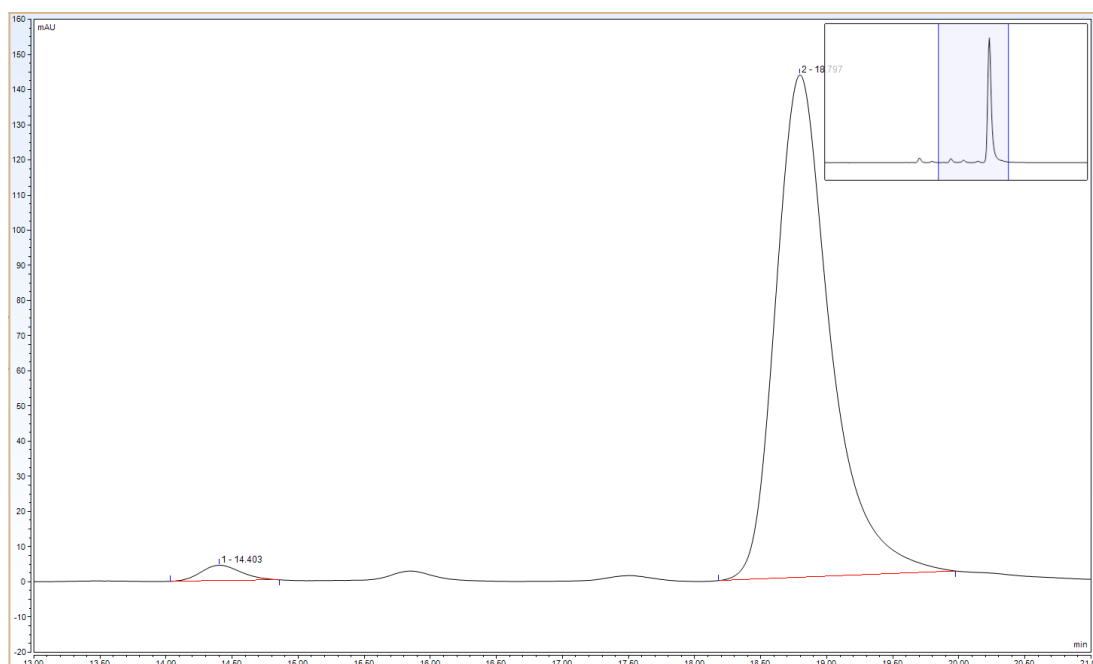

| Peak No. | Retention Time (RT), min | Area (AA), mAU*min | Relative Area, % |
|----------|--------------------------|--------------------|------------------|
| 1        | 14.403                   | 1.5313             | 2.19             |
| 2        | 18.797                   | 68.4355            | 97.81            |

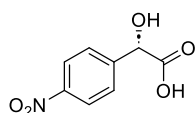

**(S)-2I**

**(S)-(+)-2-Hydroxy-2-(4-nitrophenyl)acetic acid ((S)-2I).** 4-Nitrophenyl glyoxal hydrate (**1I**·H<sub>2</sub>O, 100 mg, 0.51 mmol) was placed into a 250 mL glass flask and dissolved in sodium phosphate buffer (50 mM, pH = 7) with stirring and heating to obtain a 5 mM solution. The resulting solution was allowed to cool, mixed with 51 μmol β-mercaptoethanol solution in sodium phosphate buffer (50 mM, pH = 7) and after 5 minutes was mixed with 1.5 ml phosphate buffer solution containing 654 nmol DJ-1. Upon completion of the reaction as was determined by monitoring the shift in the UV/vis absorbance maximum to  $\lambda_{\text{max, product}} = 280$  nm the reaction mixture was acidified with a few drops of 12M HCl to pH = 2. The resulting mixture was extracted with ethyl acetate and the organic layer was dried over anhydrous sodium sulfate and concentrated in vacuo. Column chromatography<sup>6</sup> with DCM/MeOH/HCOOH (9:1:0.02) as eluent followed by trituration with pentane afforded pure **(S)-2I** (74 mg, 0.38 mmol, 74%) as yellow solid. *ee* = 99 % [UHPLC].  $[\alpha]_D^{27} = +140$  (c = 0.35, MeOH). *mp*: 92-95 °C.

Chiral UHPLC chromatogram of (S)-(+)-2-hydroxy-2-(4-nitrophenyl)acetic acid (**(S)-2I**) obtained with 0.125 ml/min flow rate, 20°C column oven and sample holder temperature:

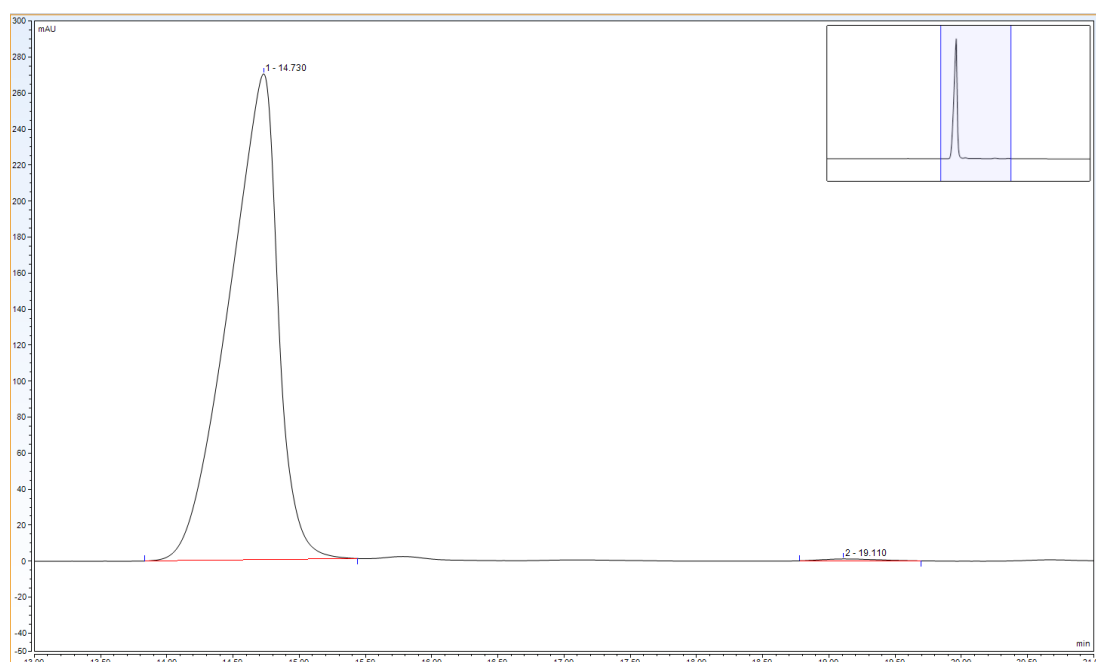

| Peak No. | Retention Time (RT), min | Area (AA), mAU*min | Relative Area, % |
|----------|--------------------------|--------------------|------------------|
| 1        | 14.73                    | 116.6019           | 99.57            |
| 2        | 19.11                    | 0.5045             | 0.43             |

Chiral UHPLC chromatogram of scalemic 2-hydroxy-2-(4-nitrophenyl)acetic acid (**2l**) obtained with 0.125 ml/min flow rate, 20°C column oven and sample holder temperature:

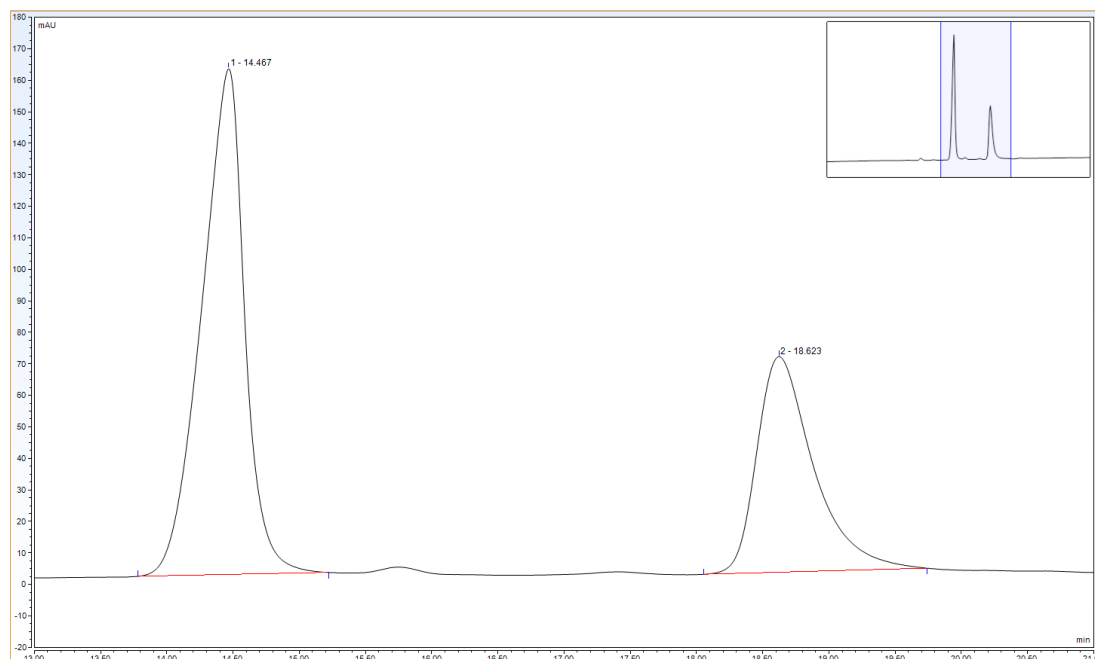

| Peak No. | Retention Time (RT), min | Area (AA), mAU*min | Relative Area, % |
|----------|--------------------------|--------------------|------------------|
| 1        | 14.467                   | 60.3685            | 64.02            |
| 2        | 18.623                   | 33.932             | 35.98            |

$^1\text{H NMR}$  (300 MHz,  $\text{DMSO-}d_6$ ):  $\delta$  8.19 (d,  $J$  = 8.5 Hz, 2H), 7.70 (d,  $J$  = 8.6 Hz, 2H), 5.08 (s, 1H).  $^{13}\text{C}\{^1\text{H}\}$  NMR (75 MHz,  $\text{DMSO-}d_6$ ):  $\delta$  173.0, 147.8, 146.9, 127.7, 123.3, 71.7; **HRMS (ESI, [M-H] $^-$ )** for  $\text{C}_8\text{H}_6\text{NO}_5^-$  calcd 196.0251, found 196.0245.

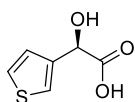

(*R*)-2m

**(*R*)-(-)-2-Hydroxy-2-(thiophen-3-yl)acetic acid ((*R*)-2m).** Thiophen-3-yl glyoxal hydrate (**1m·H<sub>2</sub>O**, 100 mg, 0.63 mmol) was placed into a 250 mL glass flask and dissolved in sodium phosphate buffer (50 mM, pH = 7) with stirring and heating to obtain a 5 mM solution. The resulting solution was allowed to cool and was mixed with 730  $\mu\text{L}$  phosphate buffer solution containing glutathione, *E. coli* glyoxalase I and glyoxalase II (31.5  $\mu\text{mol}$ , 7.85 nmol and 2.45 nmol respectively). Upon completion of the reaction as was determined by monitoring the drop in the UV/vis absorbance at  $\lambda_{\text{max}}$  = 260 nm the reaction mixture was acidified with a few drops of 12M HCl to pH = 2. The resulting mixture was extracted with ethyl acetate and the organic layer was dried over anhydrous sodium sulfate and concentrated in vacuo. Column chromatography<sup>6</sup> with DCM/MeOH/HCOOH (9:1:0.02) as eluent followed by trituration with pentane afforded pure (*R*)-**2m** (90 mg, 0.57 mmol, 90%) as brownish solid. *ee* = 99 % [UHPLC].  $[\alpha]_D^{27} = -102$  ( $c$  = 0.36, EtOAc). *mp*: 119-122 °C.

Chiral UHPLC chromatogram of (*R*)-(-)-2-hydroxy-2-(thiophen-3-yl)acetic acid (**(*R*)-2m**) obtained with 0.125 ml/min flow rate, 5°C column oven and 20°C sample holder temperature:

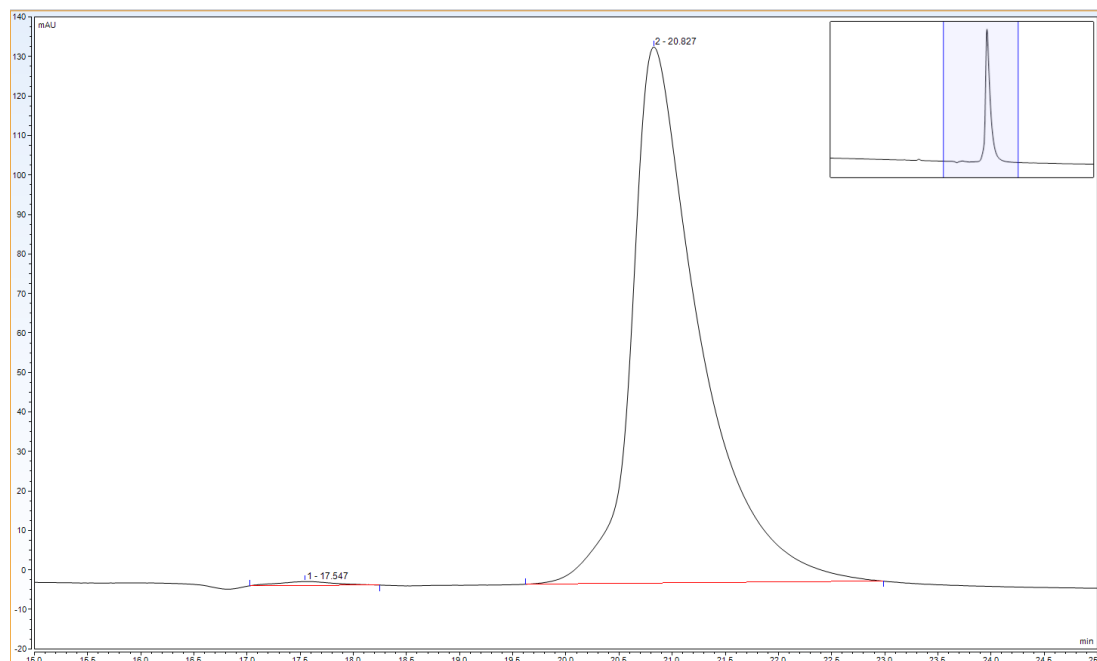

| Peak No. | Retention Time (RT), min | Area (AA), mAU*min | Relative Area, % |
|----------|--------------------------|--------------------|------------------|
| 1        | 17.547                   | 0.6268             | 0.62             |
| 2        | 20.827                   | 101.0607           | 99.38            |

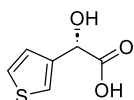

**(*S*)-(+)-2-Hydroxy-2-(thiophen-3-yl)acetic acid ((*S*)-2m).** Thiophen-3-yl glyoxal hydrate (**1m·H<sub>2</sub>O**, 100 mg, 0.63 mmol) was placed into a 250 mL glass flask and dissolved in sodium phosphate buffer (50 mM, pH = 7) with stirring and heating to obtain a 5 mM solution. The resulting solution was allowed to cool and was mixed with 0.855 ml phosphate buffer solution containing 479 nmol DJ-1. Upon completion of the reaction as was determined by monitoring the drop in the UV/vis absorbance at  $\lambda_{\text{max}} = 260$  nm the reaction mixture was acidified with a few drops of 12M HCl to pH = 2. The resulting mixture was extracted with ethyl acetate and the organic layer was dried over anhydrous sodium sulfate and concentrated in vacuo. The crude product was triturated with pentane to afford pure **(*S*)-2m** (97 mg, 0.61 mmol, 97%) as brownish solid. *ee* = 98 % [UHPLC].  $[\alpha]_D^{27} = +104$  (*c* = 0.34, EtOAc). *mp*: 116-119 °C.

Chiral UHPLC chromatogram of (*S*)-(+)-2-hydroxy-2-(thiophen-3-yl)acetic acid (**(S)-2m**) obtained with 0.125 ml/min flow rate, 5°C column oven and 20°C sample holder temperature:

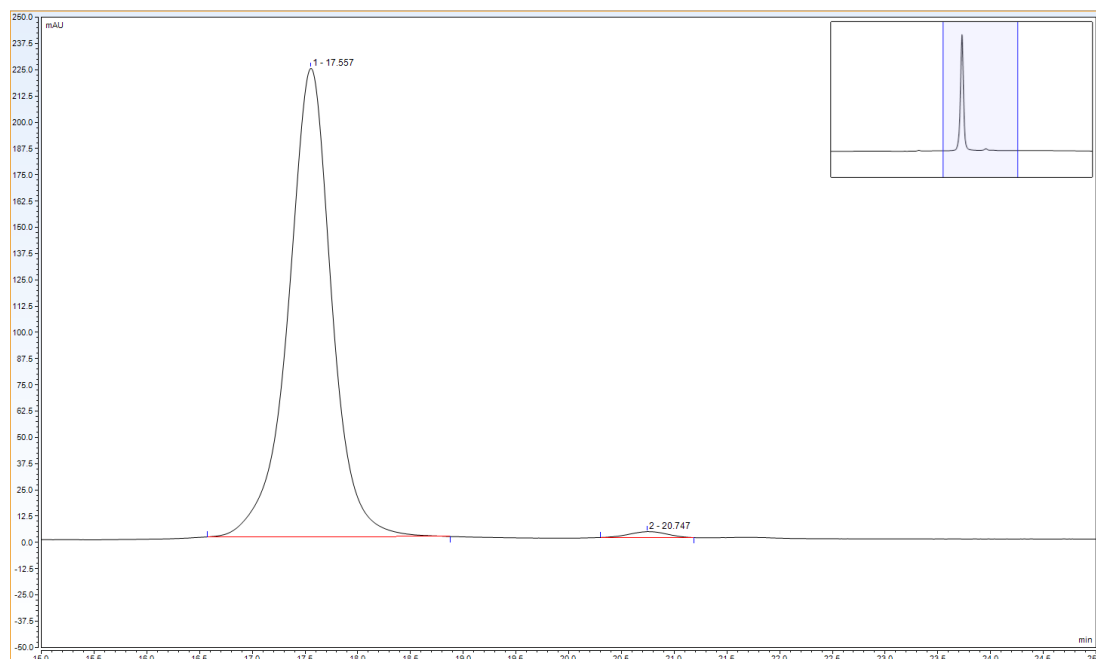

| Peak No. | Retention Time (RT), min | Area (AA), mAU*min | Relative Area, % |
|----------|--------------------------|--------------------|------------------|
| 1        | 17.557                   | 106.5547           | 98.91            |
| 2        | 20.747                   | 1.178              | 1.09             |

Chiral UHPLC chromatogram of nearly racemic 2-hydroxy-2-(thiophen-3-yl)acetic acid (**2m**) obtained with 0.125 ml/min flow rate, 5°C column oven and 20°C sample holder temperature:

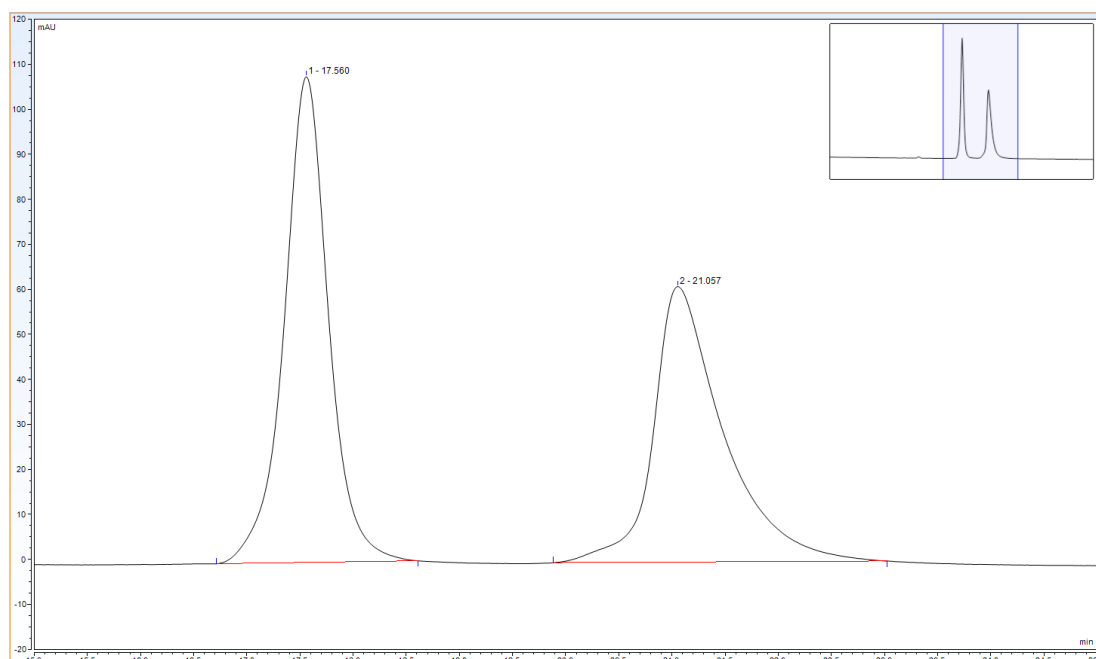

| Peak No. | Retention Time (RT), min | Area (AA), mAU*min | Relative Area, % |
|----------|--------------------------|--------------------|------------------|
| 1        | 17.56                    | 52.207             | 52.81            |
| 2        | 21.057                   | 46.6434            | 47.19            |

**<sup>1</sup>H NMR (300 MHz, DMSO-*D*<sub>6</sub>):** δ 7.48 (dd, *J* = 5.0, 3.0 Hz, 1H), 7.44 – 7.39 (m, 1H), 7.10 (dd, *J* = 5.0, 1.1 Hz, 1H), 5.81 (bs, 1H), 5.09 (s, 1H). **<sup>13</sup>C{<sup>1</sup>H} NMR (75 MHz, DMSO-*D*<sub>6</sub>):** δ 173.7, 141.2, 126.5, 126.0, 122.2, 69.0; **HRMS (ESI, [M-H]<sup>-</sup>)** for C<sub>6</sub>H<sub>5</sub>O<sub>3</sub>S<sup>-</sup> calcd 156.9965, found 156.9963.

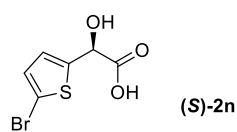

**(S)-(-)-2-(5-Bromothiophen-2-yl)-2-hydroxyacetic acid ((S)-2n).** 5-Bromothiophen-2-yl glyoxal hydrate (**1n·H<sub>2</sub>O**, 100 mg, 0.42 mmol) was placed into a 250 mL glass flask and dissolved in sodium phosphate buffer (50 mM, pH = 7) with stirring and heating to obtain a 5 mM solution. The resulting solution was allowed to cool and was mixed with 520 μl phosphate buffer solution containing glutathione, *E. coli* glyoxalase I and glyoxalase II (21 μmol, 7.85 nmol and 2.45 nmol respectively). Upon completion of the reaction as was determined by monitoring the drop in the UV/vis absorbance at λ<sub>max</sub> = 305 nm the reaction mixture was acidified with a few drops of 12M HCl to pH = 2. The resulting mixture was extracted with ethyl acetate and the organic layer was dried over anhydrous sodium sulfate and concentrated in vacuo. The crude product was triturated with pentane to afford pure **(S)-2n** (86 mg, 0.36 mmol, 86%) as brownish solid. *ee* = 94 % [UHPLC]. [*α*]<sub>D</sub><sup>27</sup> = -31 (*c* = 0.36, EtOAc). *mp*: 104-107 °C.

Chiral UHPLC chromatogram of (S)-(-)-2-(5-bromothiophen-2-yl)-2-hydroxyacetic acid (**(S)-2n**) obtained with 0.8 ml/min flow rate, 30°C column oven and 5°C sample holder temperature:

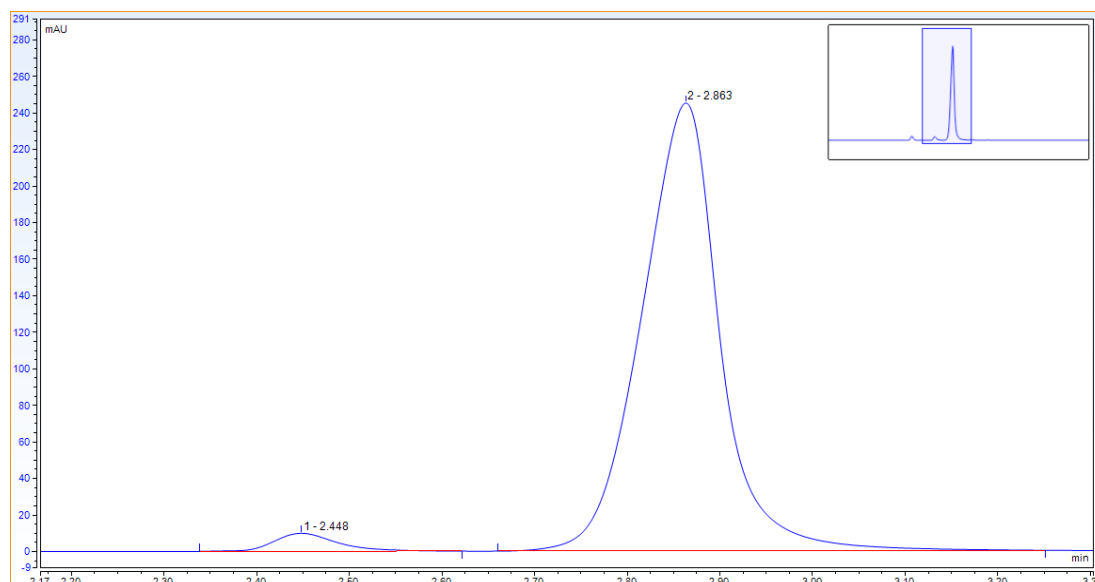

| Peak No. | Retention Time (RT), min | Area (AA), mAU*min | Relative Area, % |
|----------|--------------------------|--------------------|------------------|
| 1        | 2.448                    | 0.781              | 3.16             |
| 2        | 2.863                    | 23.955             | 96.84            |

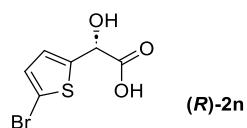

**(R)-(+)-2-(5-Bromothiophen-2-yl)-2-hydroxyacetic acid ((R)-2n).**

5-Bromothiophen-2-yl glyoxal hydrate (**1n·H<sub>2</sub>O**, 100 mg, 0.42 mmol) was placed into a 250 mL glass flask and dissolved in sodium phosphate buffer (50 mM, pH = 7) with stirring and heating to obtain a 5 mM solution. The resulting solution was allowed to cool and was mixed with 0.105 ml phosphate buffer solution containing 59 nmol DJ-1. Upon completion of the reaction as was determined by monitoring the drop in the UV/vis absorbance at λ<sub>max</sub> = 305 nm the reaction mixture was acidified with a few drops of 12M HCl to pH = 2. The resulting mixture was extracted with ethyl acetate and the organic layer was dried over anhydrous sodium sulfate and concentrated in vacuo. The crude product was triturated with pentane to afford pure **(R)-2n** (94 mg, 0.40 mmol, 94%) as brownish solid. *ee* = 97 % [UHPLC]. [*α*]<sub>D</sub><sup>27</sup> = +39 (*c* = 0.54, EtOAc). *mp*: 106-109 °C.

Chiral UHPLC chromatogram of (*R*)-(+)-2-(5-bromothiophen-2-yl)-2-hydroxyacetic acid (**(R)-2n**) obtained with 0.8 ml/min flow rate, 30°C column oven and 5°C sample holder temperature:

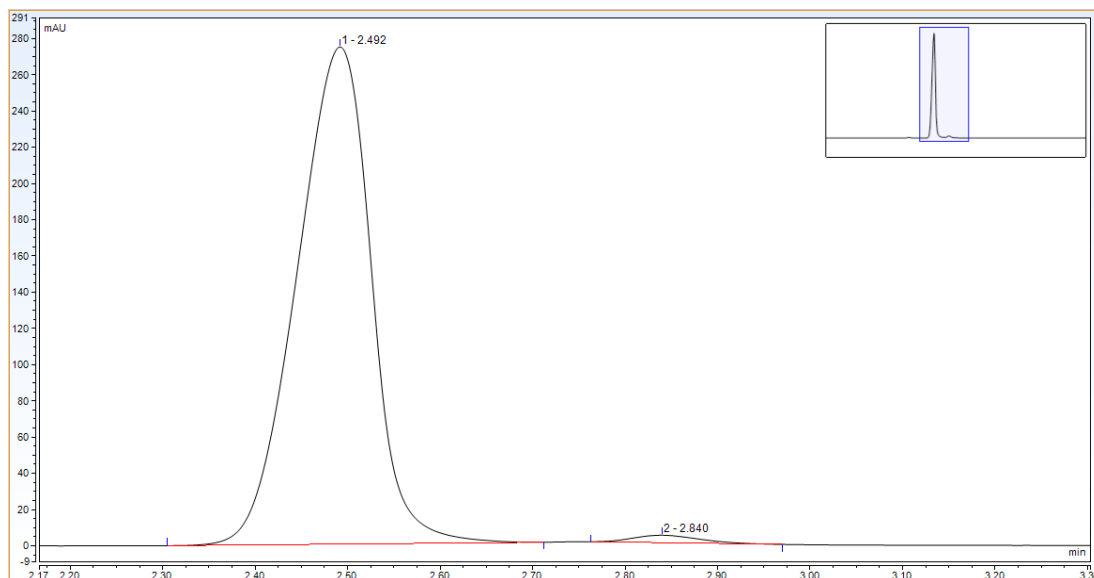

| Peak No. | Retention Time (RT), min | Area (AA), mAU*min | Relative Area, % |
|----------|--------------------------|--------------------|------------------|
| 1        | 2.492                    | 25.502             | 98.67            |
| 2        | 2.840                    | 0.343              | 1.33             |

Chiral UHPLC chromatogram of scalemic 2-(5-bromothiophen-2-yl)-2-hydroxyacetic acid (**2n**) obtained with 0.8 ml/min flow rate, 30°C column oven and 5°C sample holder temperature:

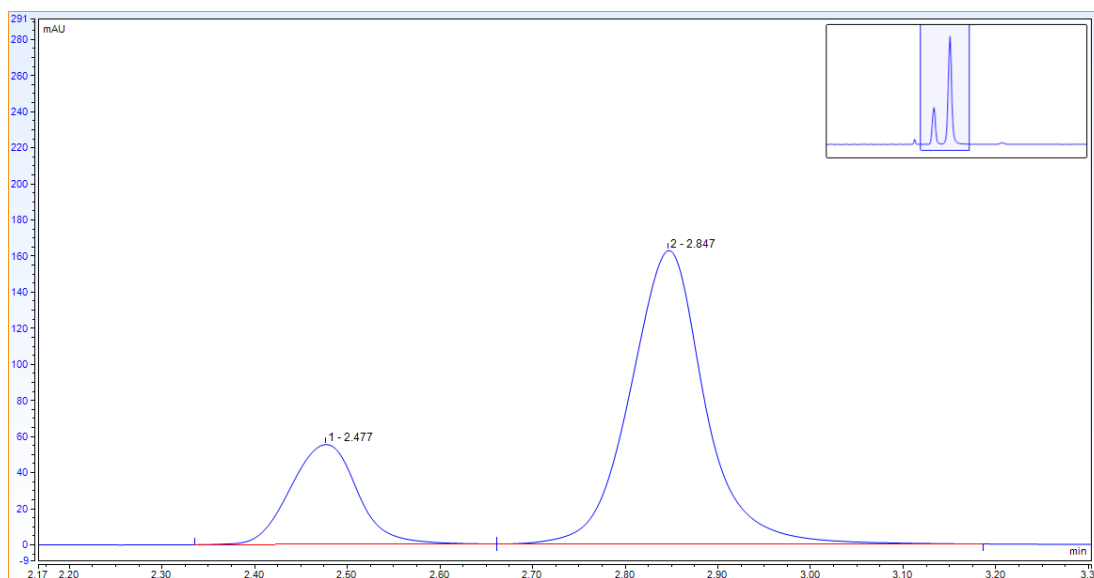

| Peak No. | Retention Time (RT), min | Area (AA), mAU*min | Relative Area, % |
|----------|--------------------------|--------------------|------------------|
| 1        | 2.477                    | 4.637              | 23.45            |
| 2        | 2.847                    | 15.134             | 76.55            |

$^1\text{H}$  NMR (300 MHz, DMSO-*D*<sub>6</sub>):  $\delta$  7.08 (d,  $J$  = 3.8 Hz, 1H), 6.90 (dd,  $J$  = 3.8, 1.0 Hz, 1H), 6.29 (bs, 1H), 5.24 (d,  $J$  = 0.8 Hz, 1H).  $^{13}\text{C}\{^1\text{H}\}$  NMR (75 MHz, DMSO-*D*<sub>6</sub>):  $\delta$  172.5, 145.4, 129.8, 125.6, 110.6, 68.7; HRMS (ESI,  $[M-H]^+$ ) for C<sub>6</sub>H<sub>4</sub>BrO<sub>3</sub>S<sup>+</sup> calcd 234.9070, found 234.9062.

## Copies of $^1\text{H}$ and $^{13}\text{C}\{^1\text{H}\}$ spectra of compounds 2

Copies of  $^1\text{H}$  and  $^{13}\text{C}\{^1\text{H}\}$  spectra of compound **2b**

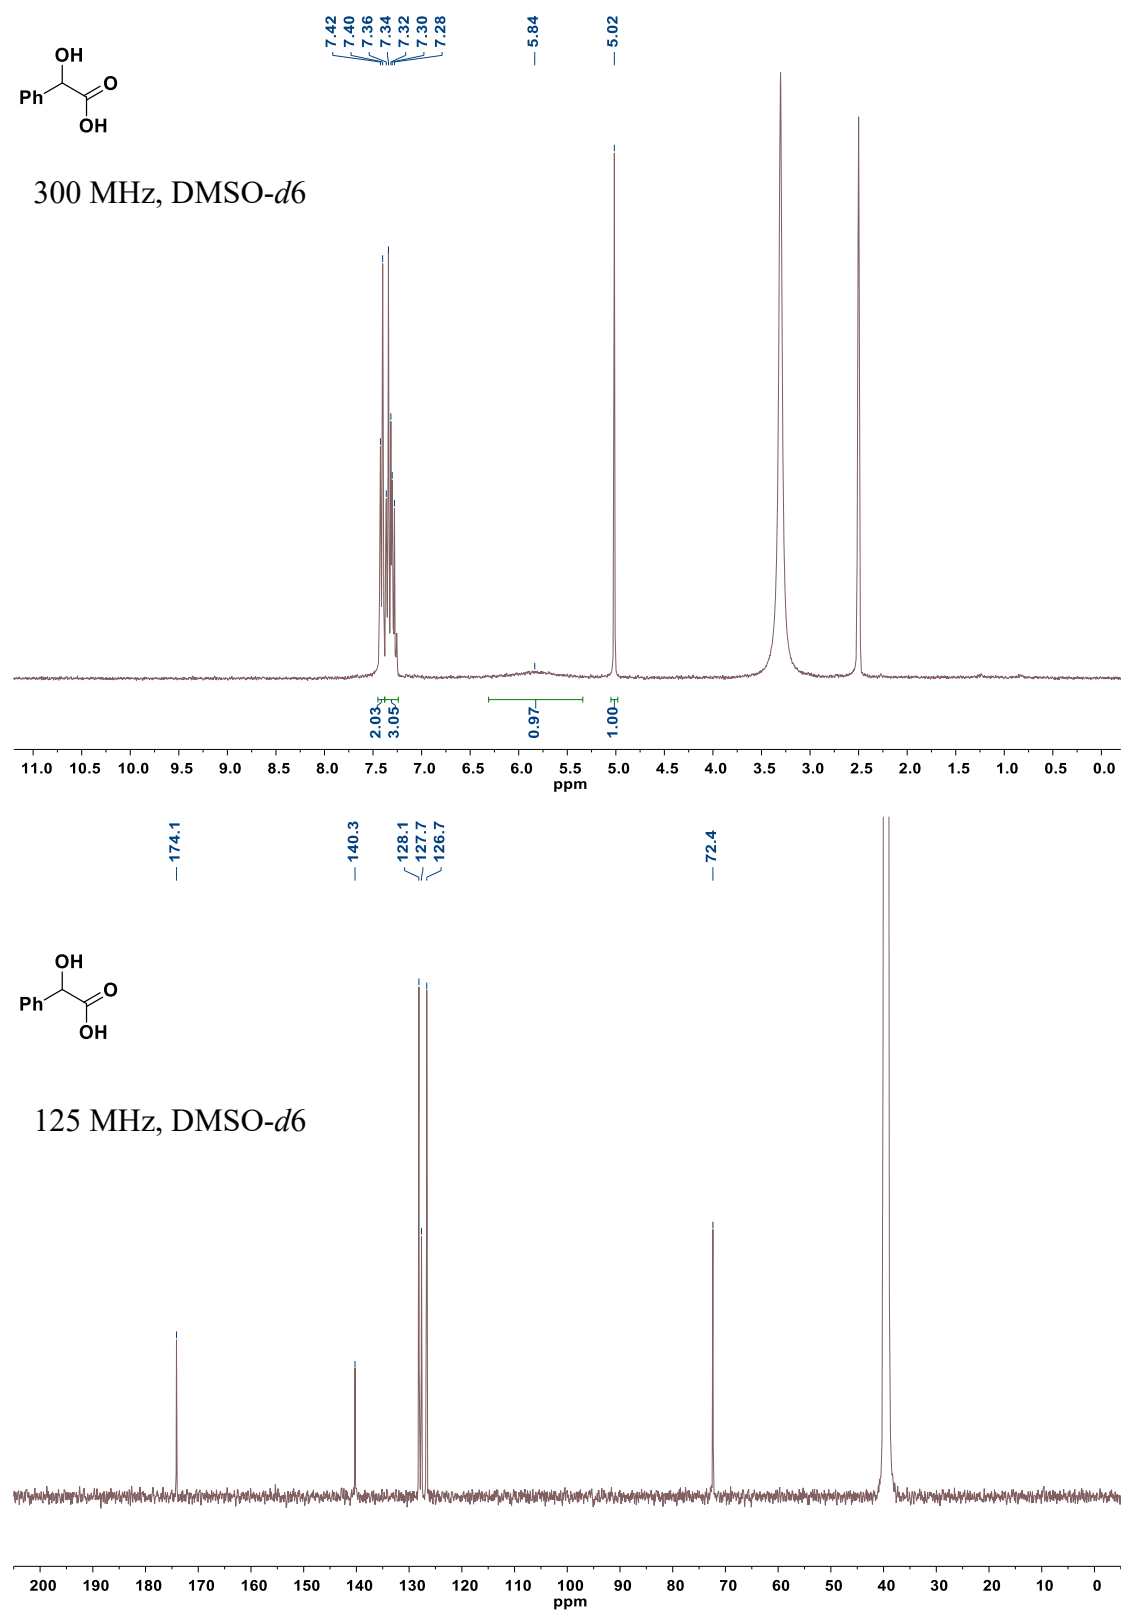

Copies of  $^1\text{H}$  and  $^{13}\text{C}\{^1\text{H}\}$  spectra of compound **2c**

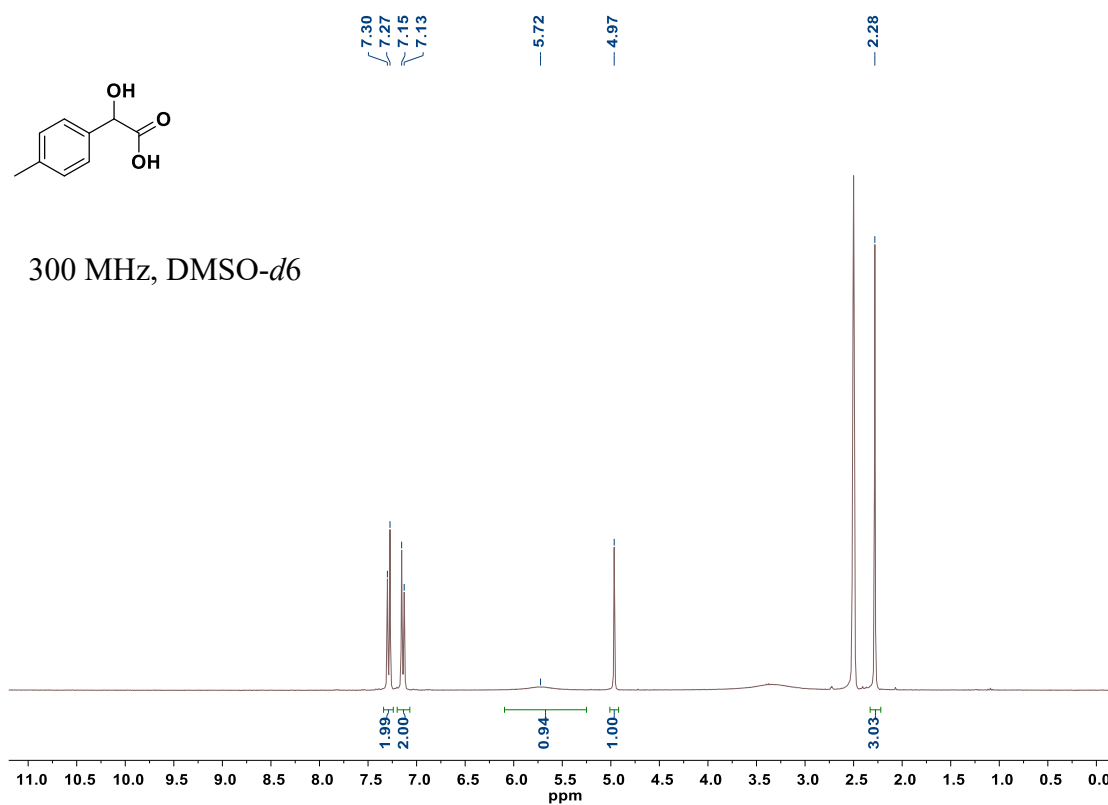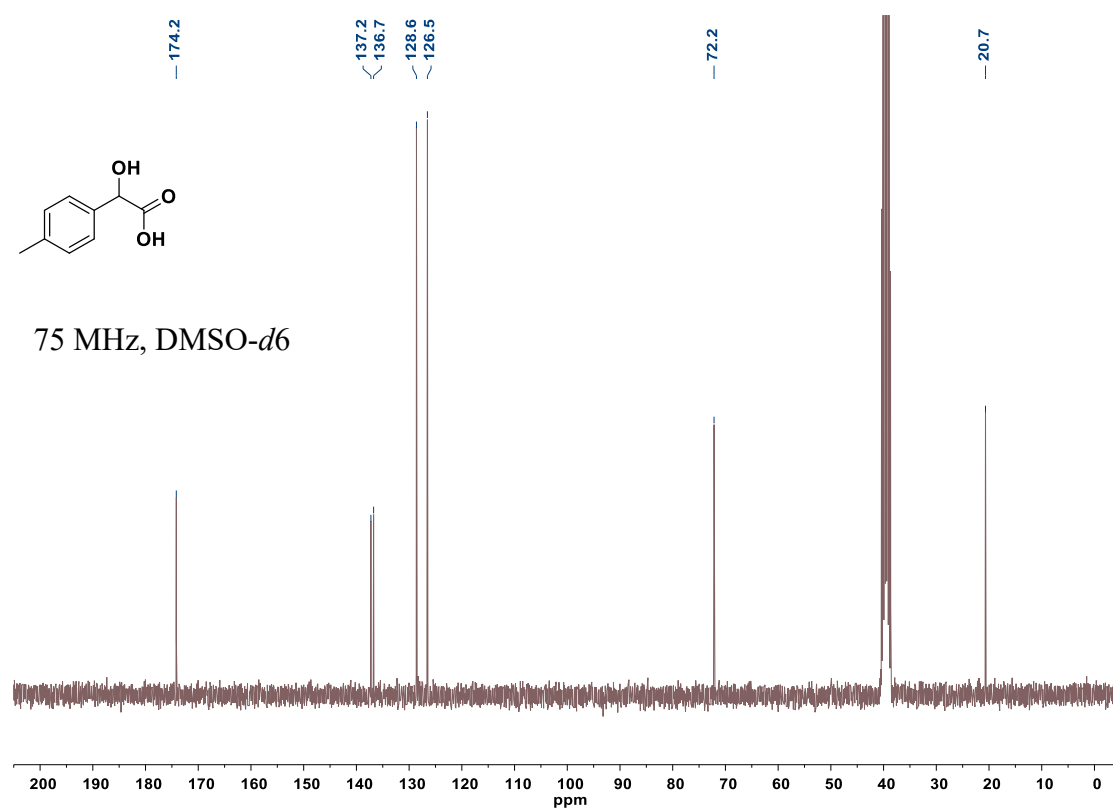

Copies of  $^1\text{H}$  and  $^{13}\text{C}\{^1\text{H}\}$  spectra of compound **2d**

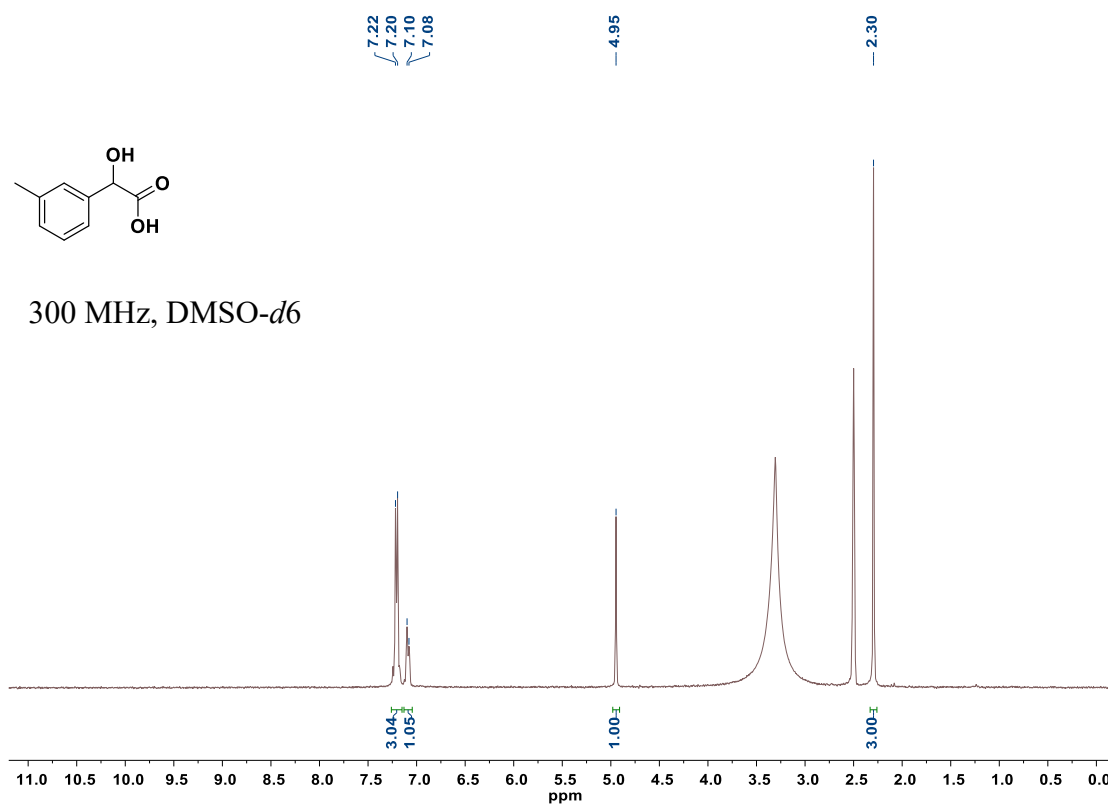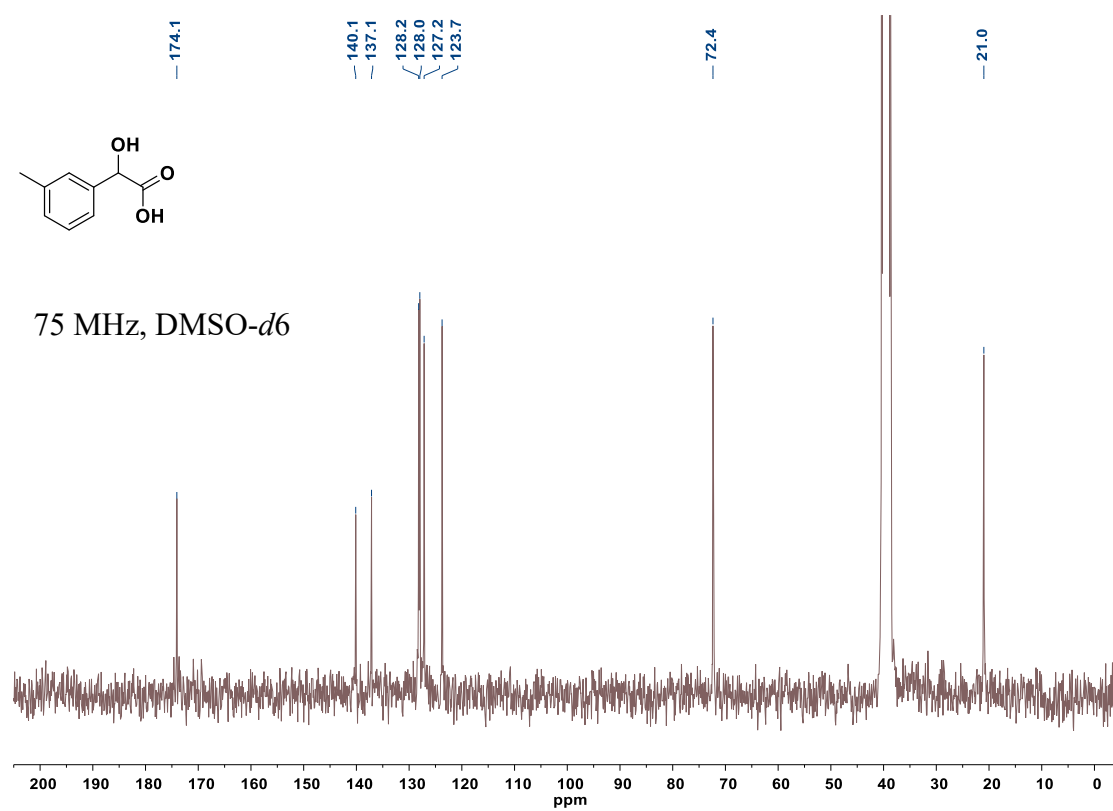

Copies of  $^1\text{H}$ ,  $^{13}\text{C}\{^1\text{H}\}$  and  $^{19}\text{F}\{^1\text{H}\}$  spectra of compound **2e**

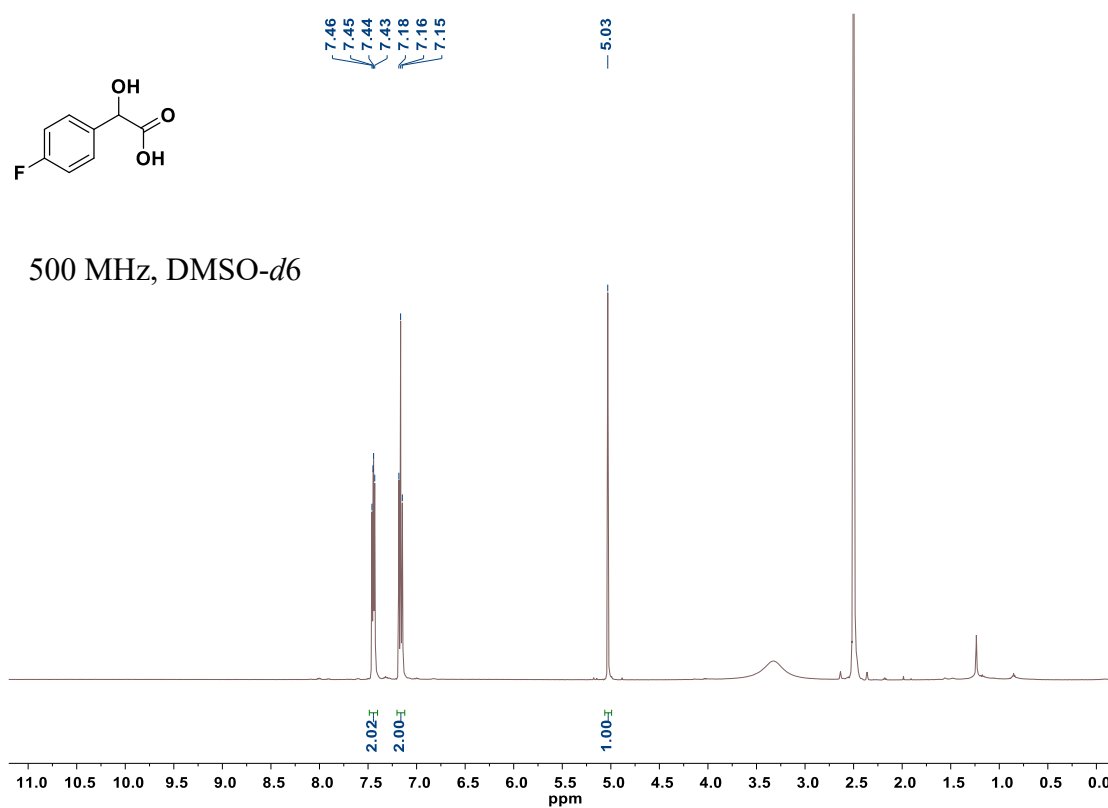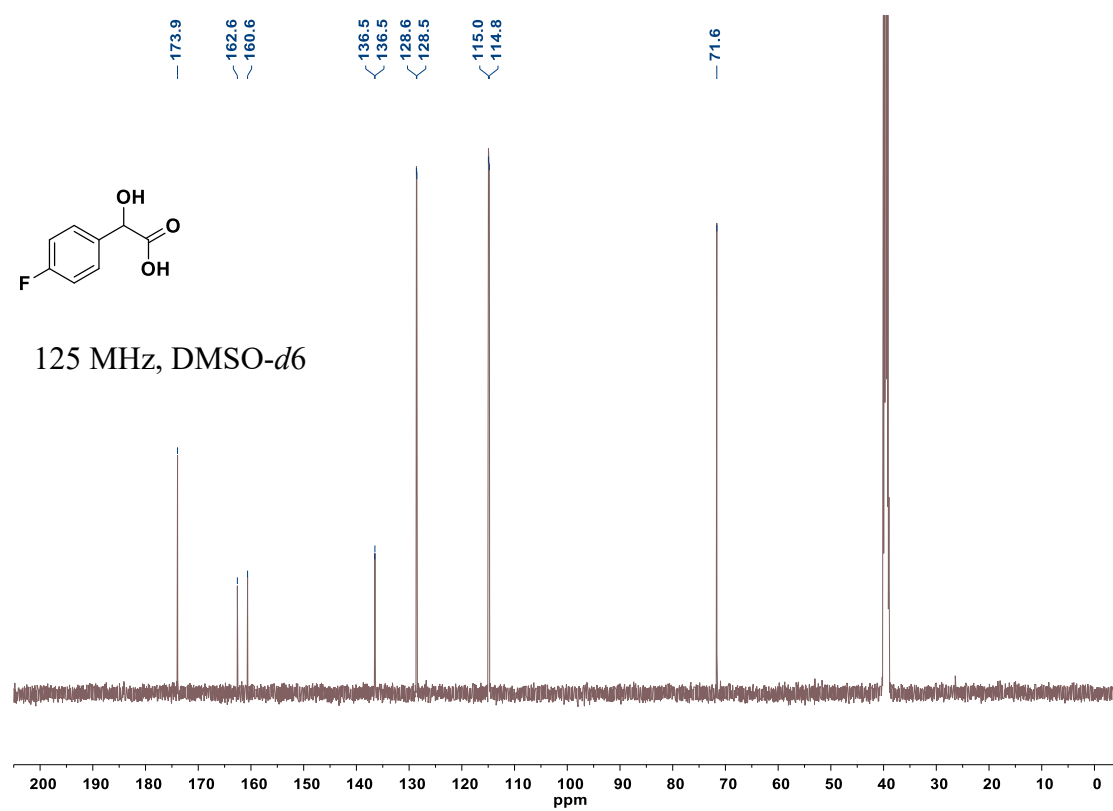

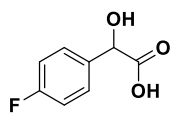

282 MHz, DMSO-*d*<sub>6</sub>

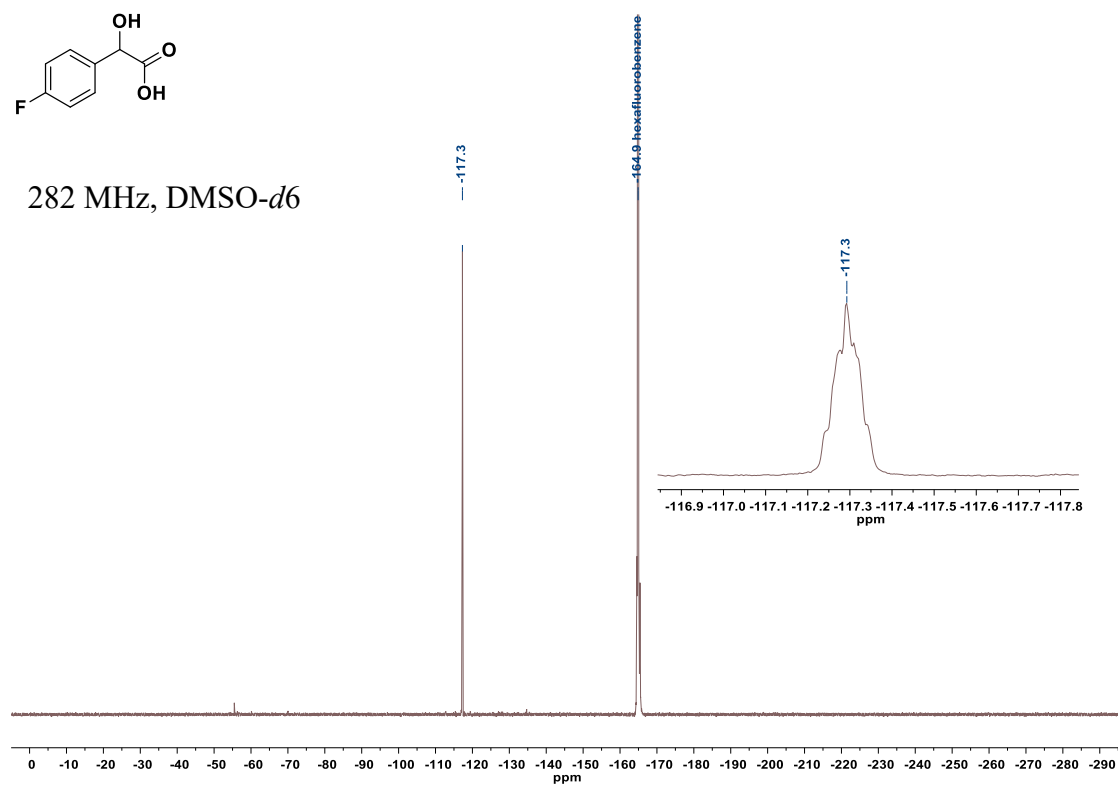

Copies of  $^1\text{H}$  and  $^{13}\text{C}\{^1\text{H}\}$  spectra of compound **2f**

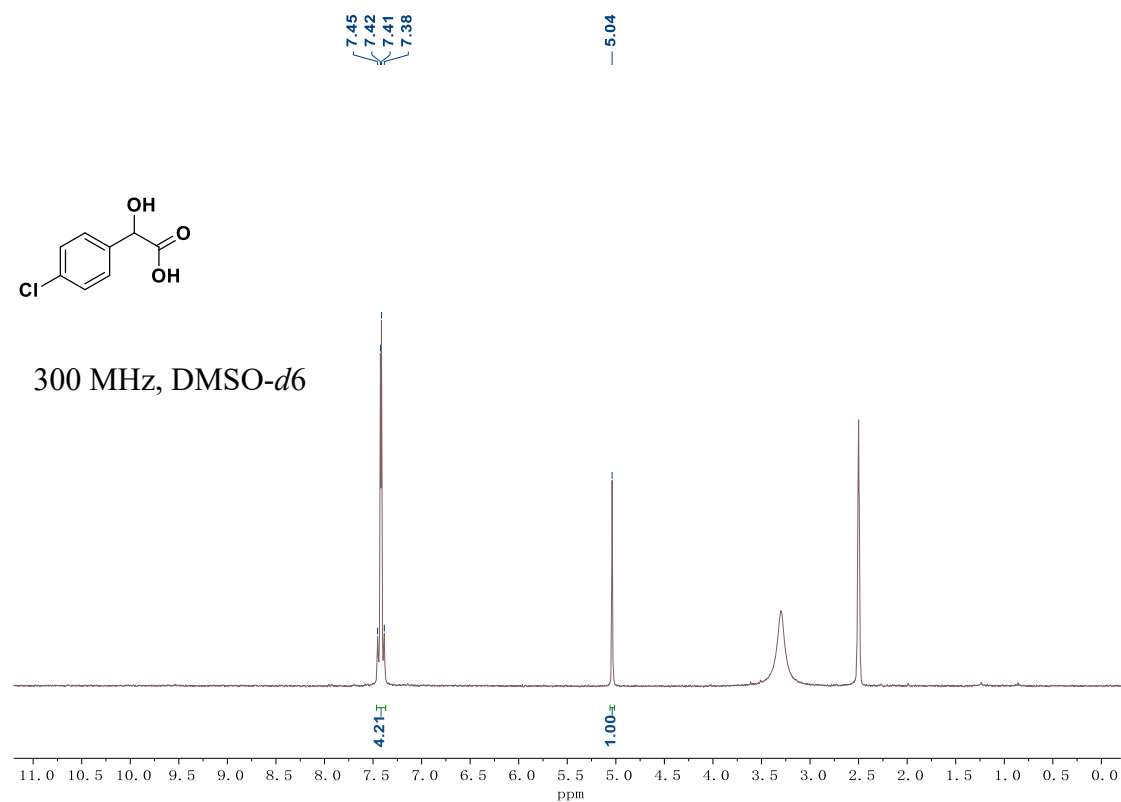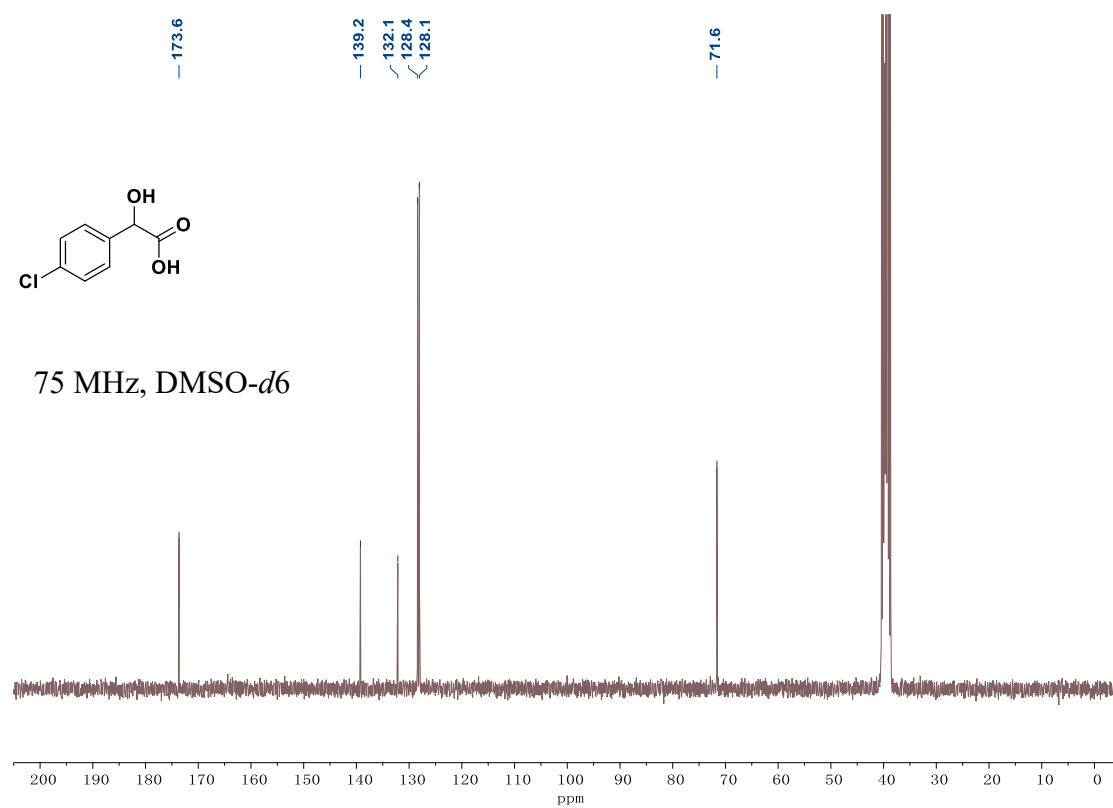

Copies of  $^1\text{H}$  and  $^{13}\text{C}\{^1\text{H}\}$  spectra of compound **2g**

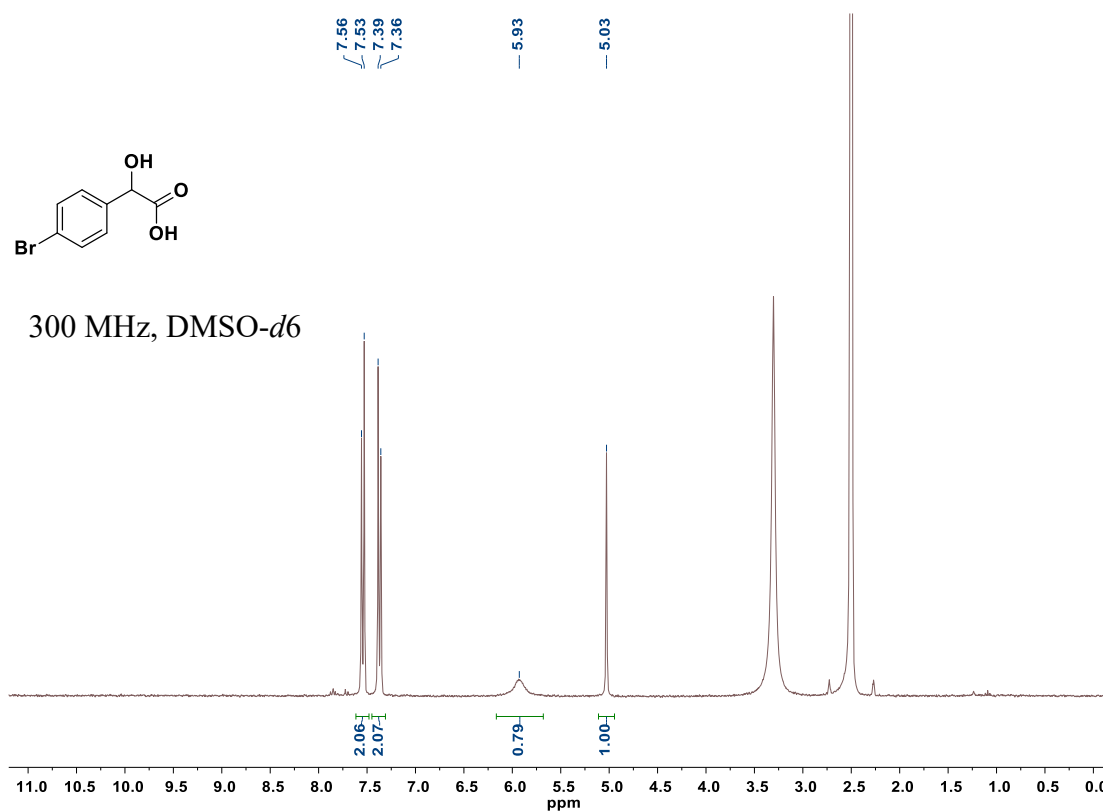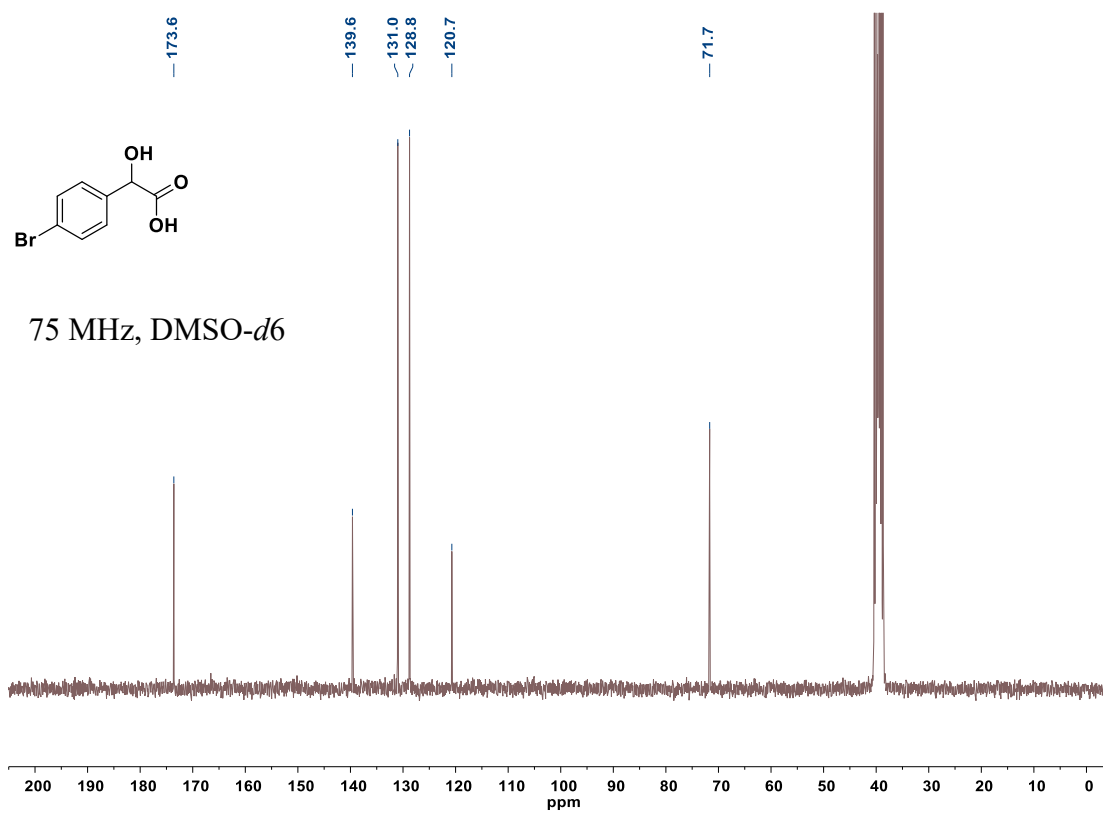

Copies of  $^1\text{H}$  and  $^{13}\text{C}\{^1\text{H}\}$  spectra of compound **2h**

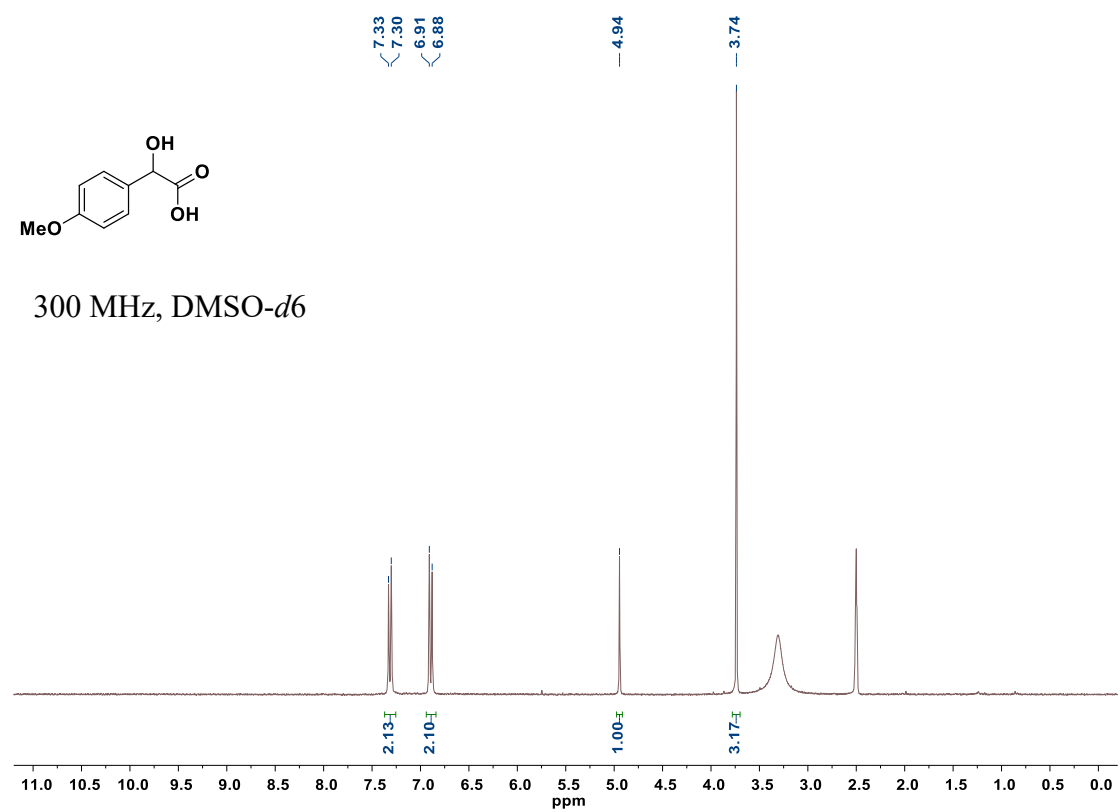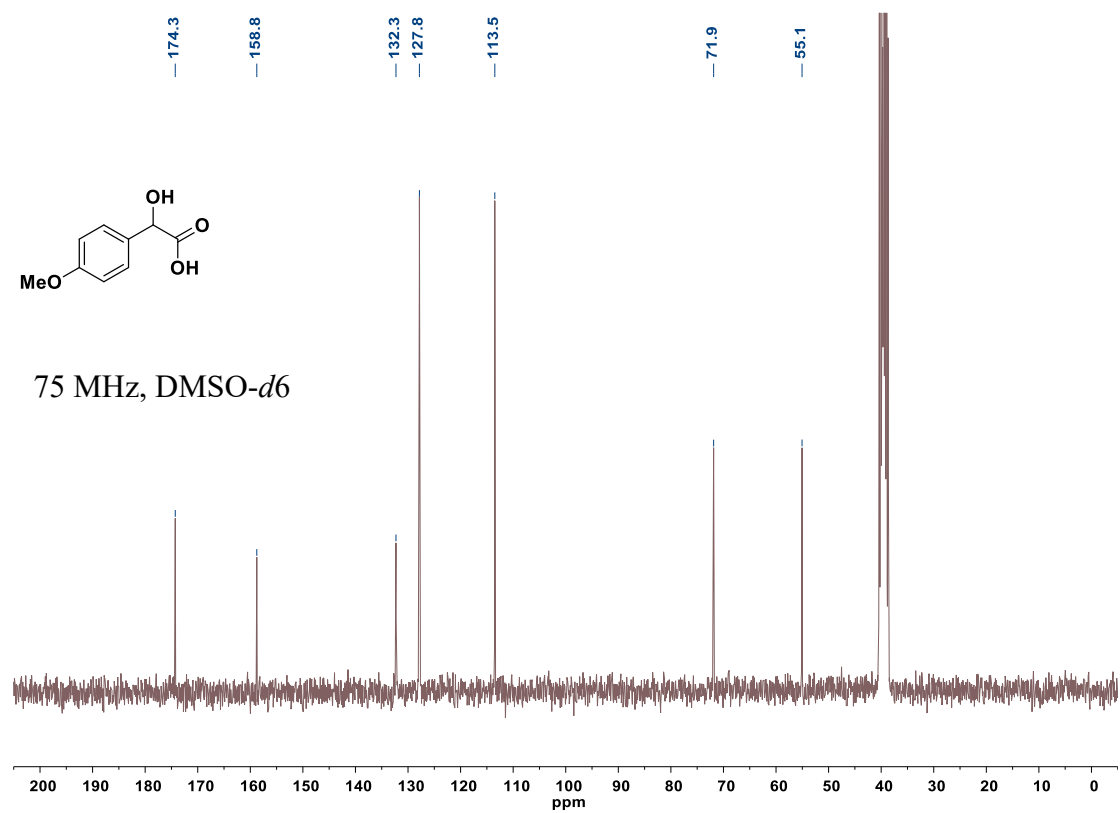

Copies of  $^1\text{H}$  and  $^{13}\text{C}\{^1\text{H}\}$  spectra of compound **2i**

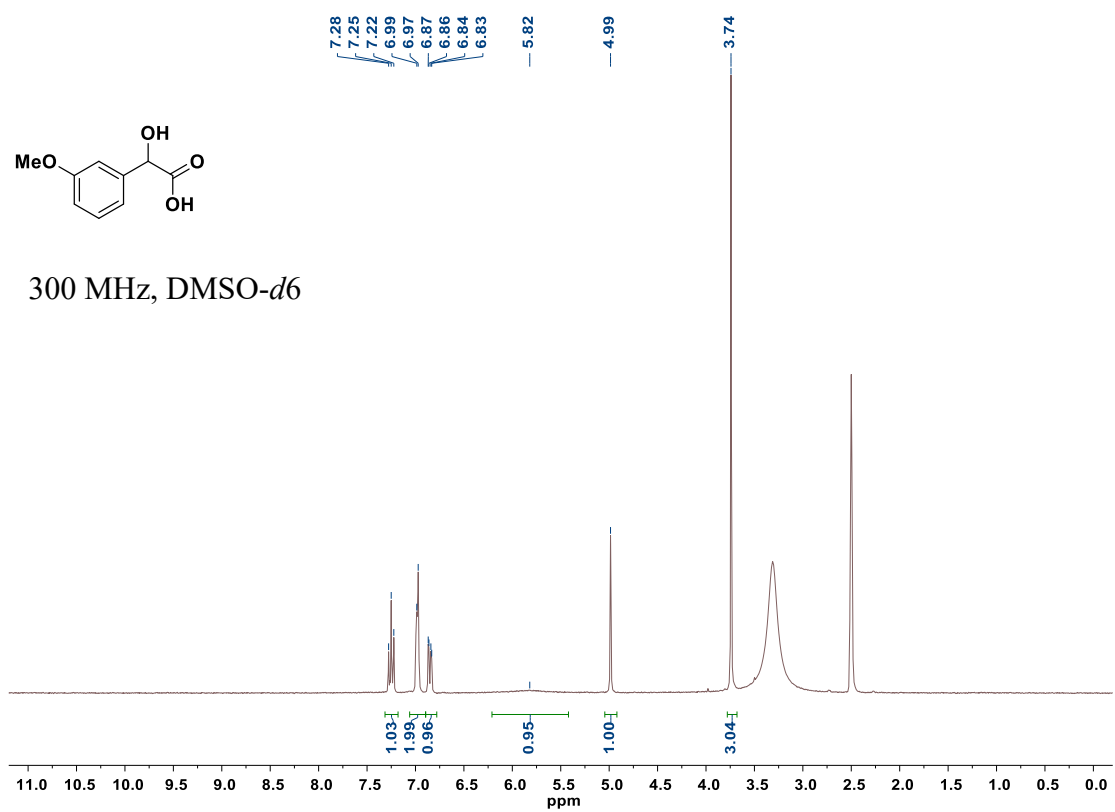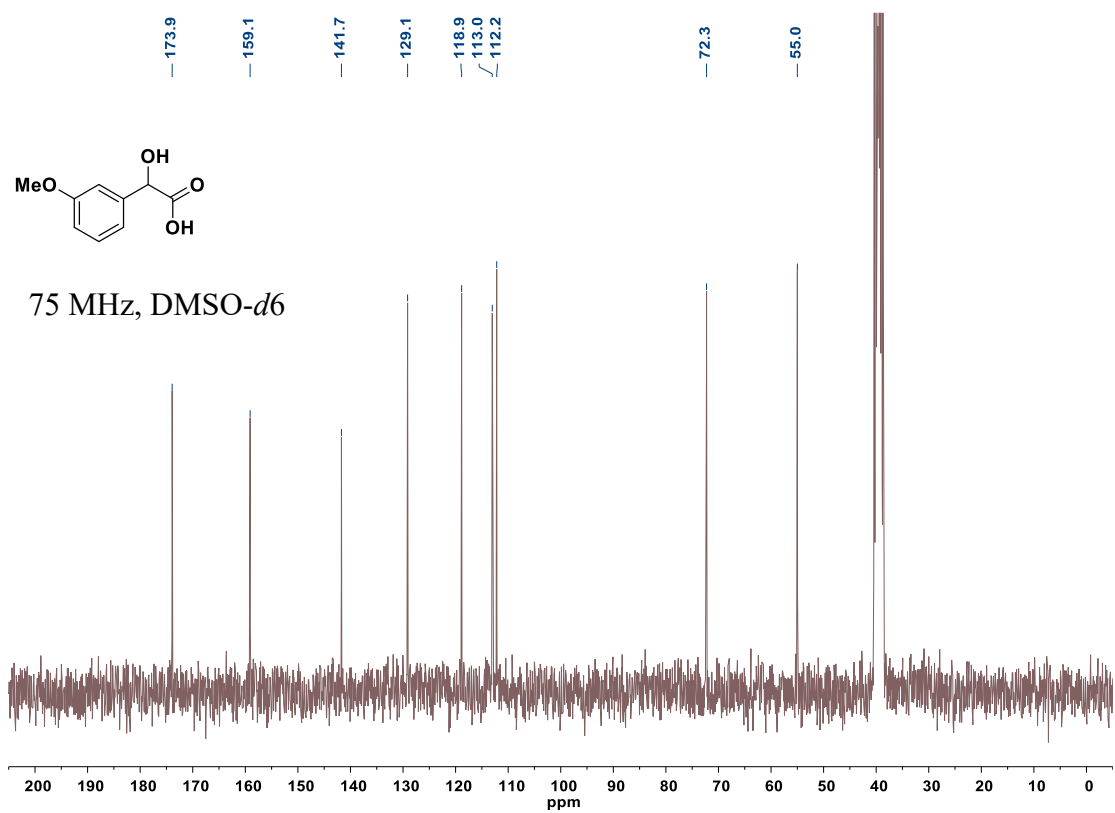

Copies of  $^1\text{H}$  and  $^{13}\text{C}\{^1\text{H}\}$  spectra of compound **2j**

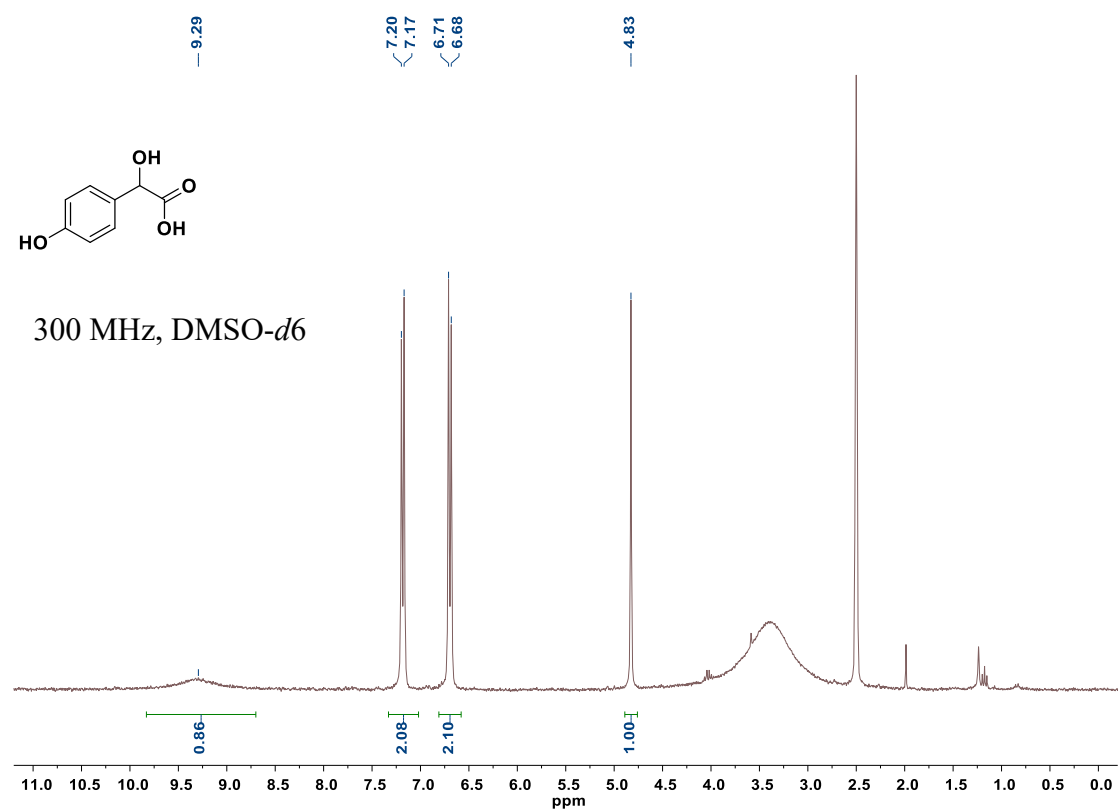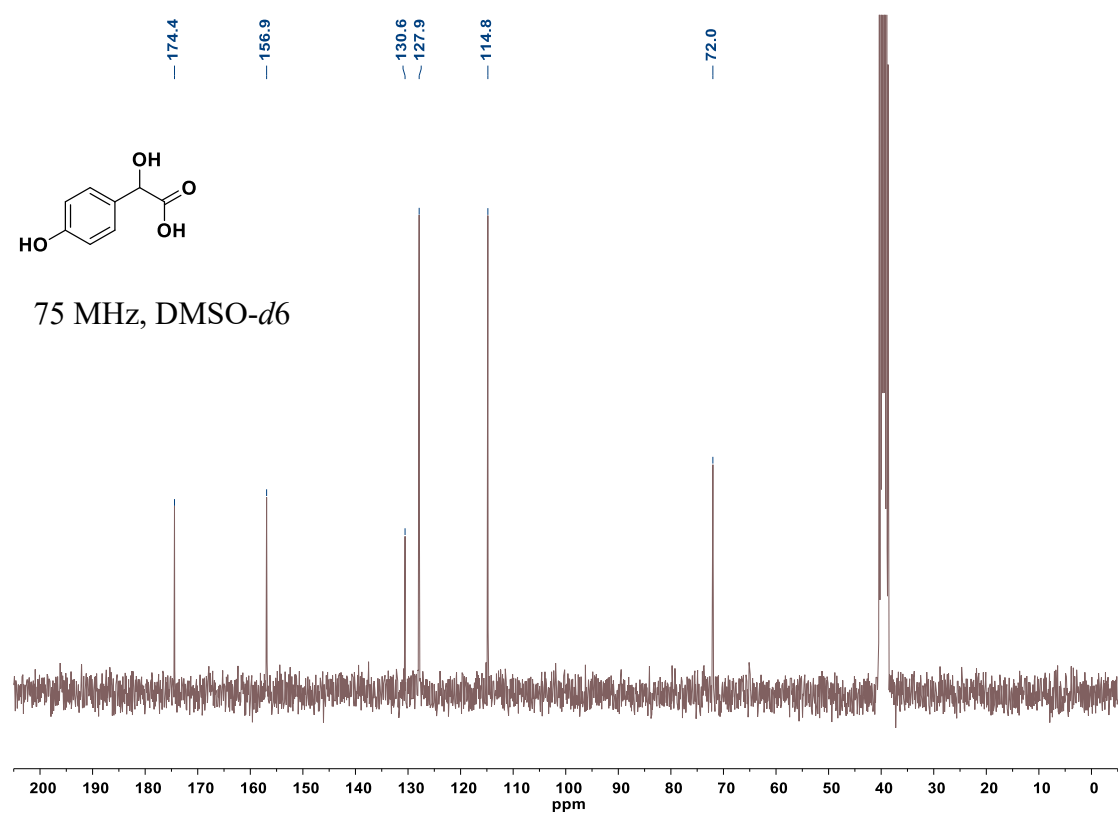

Copies of  $^1\text{H}$ ,  $^{13}\text{C}\{^1\text{H}\}$  and  $^{19}\text{F}\{^1\text{H}\}$  spectra of compound **2k**

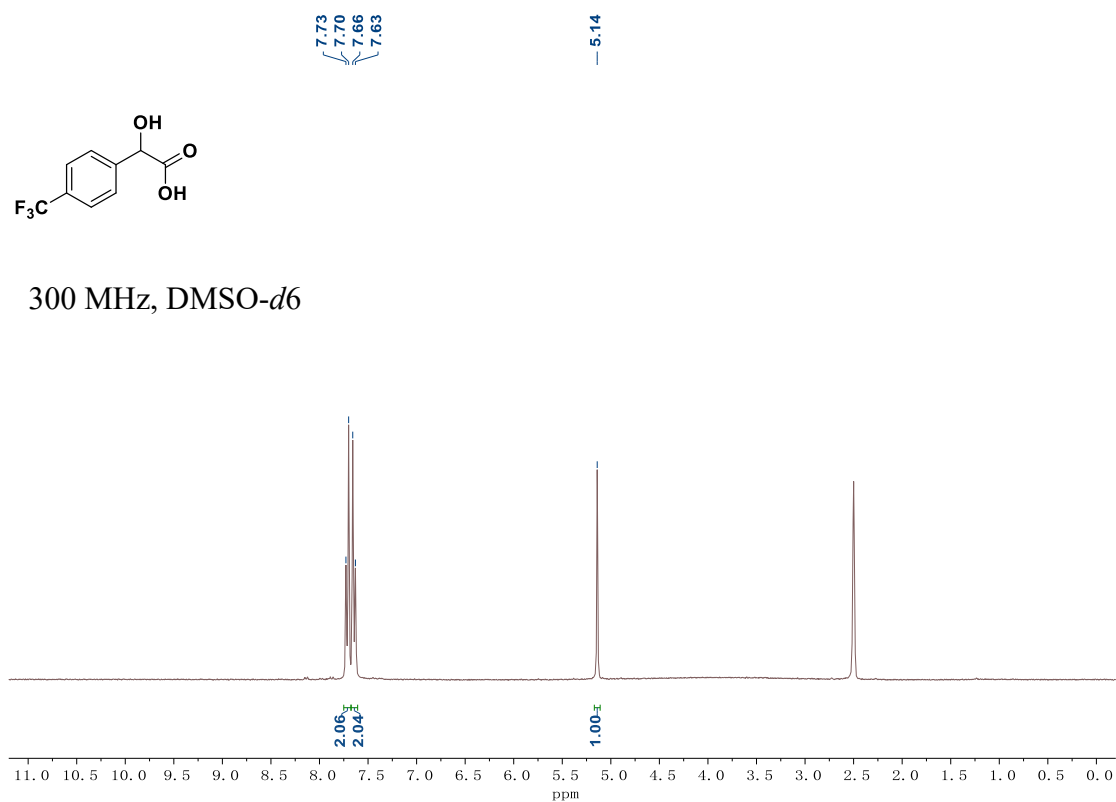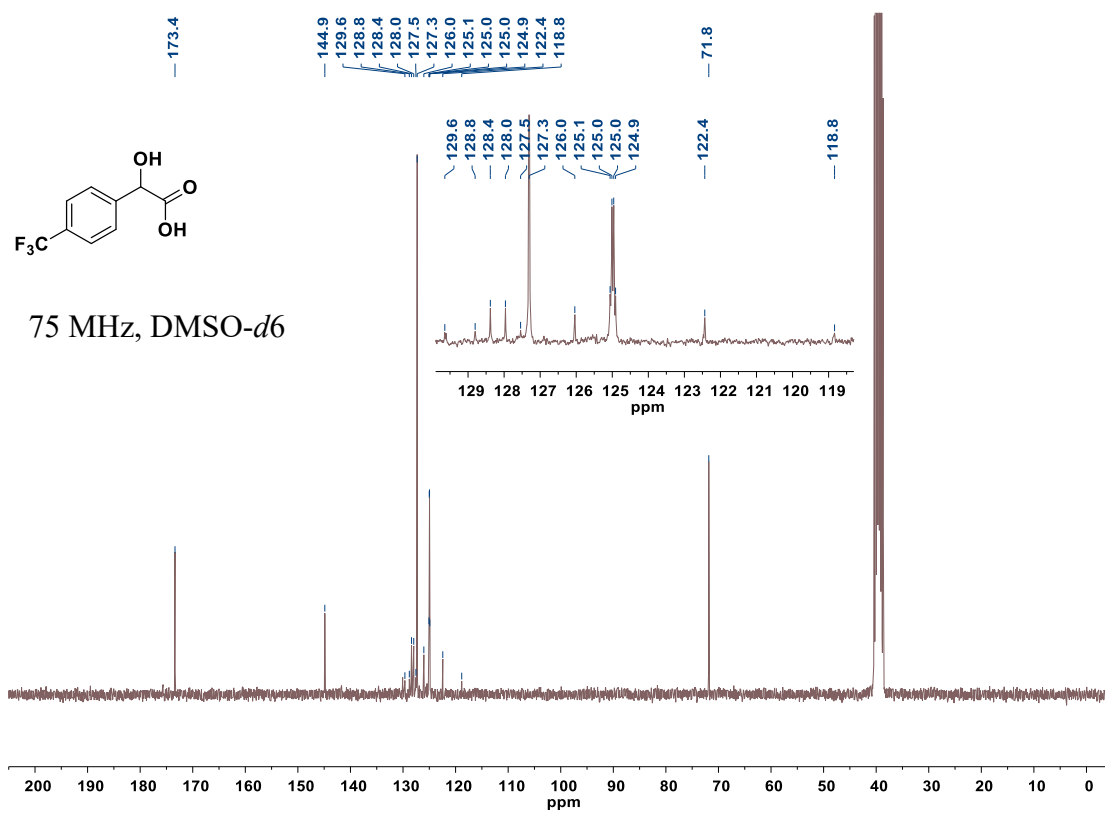

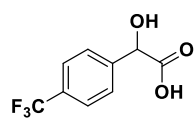

282 MHz, DMSO-*d*<sub>6</sub>

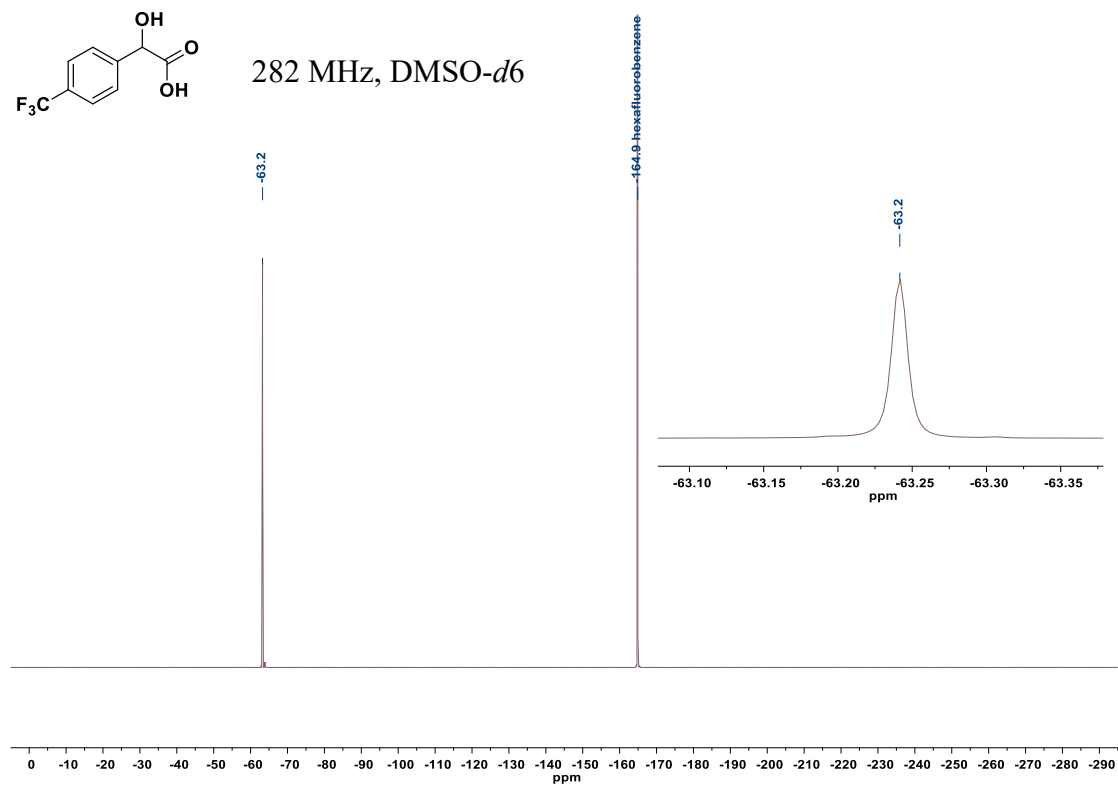

Copies of  $^1\text{H}$  and  $^{13}\text{C}\{^1\text{H}\}$  spectra of compound **21**

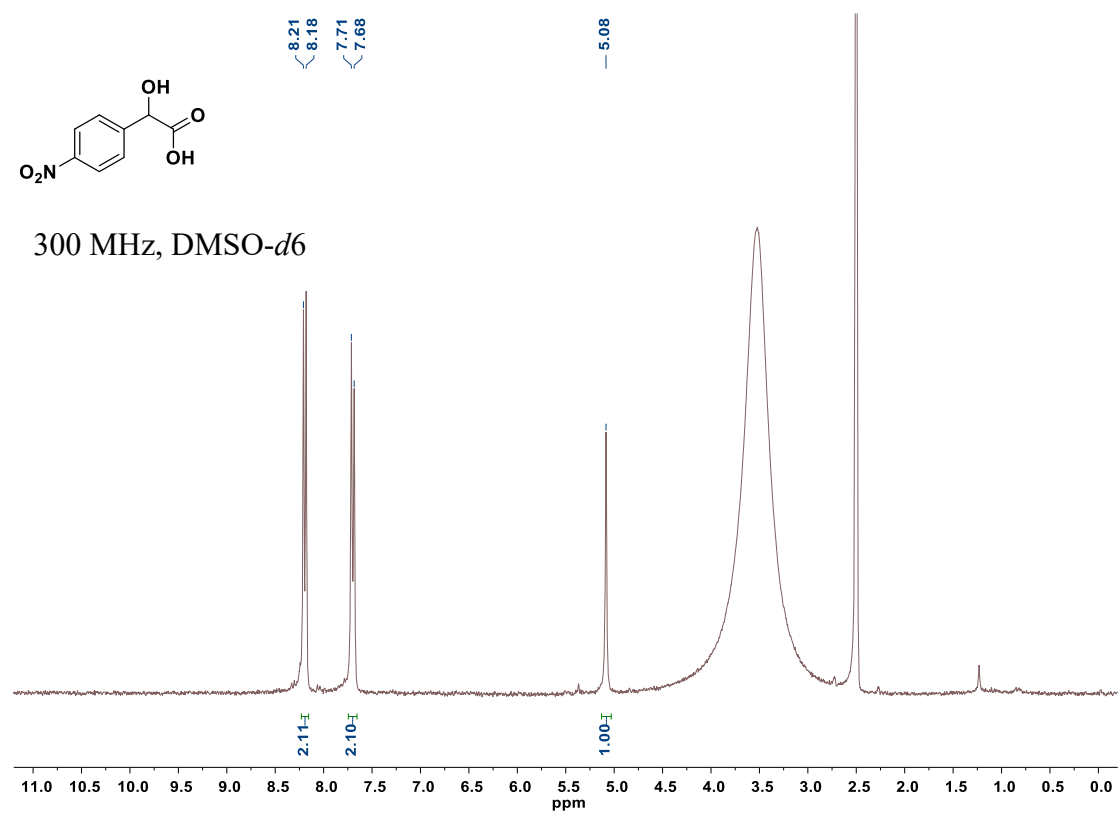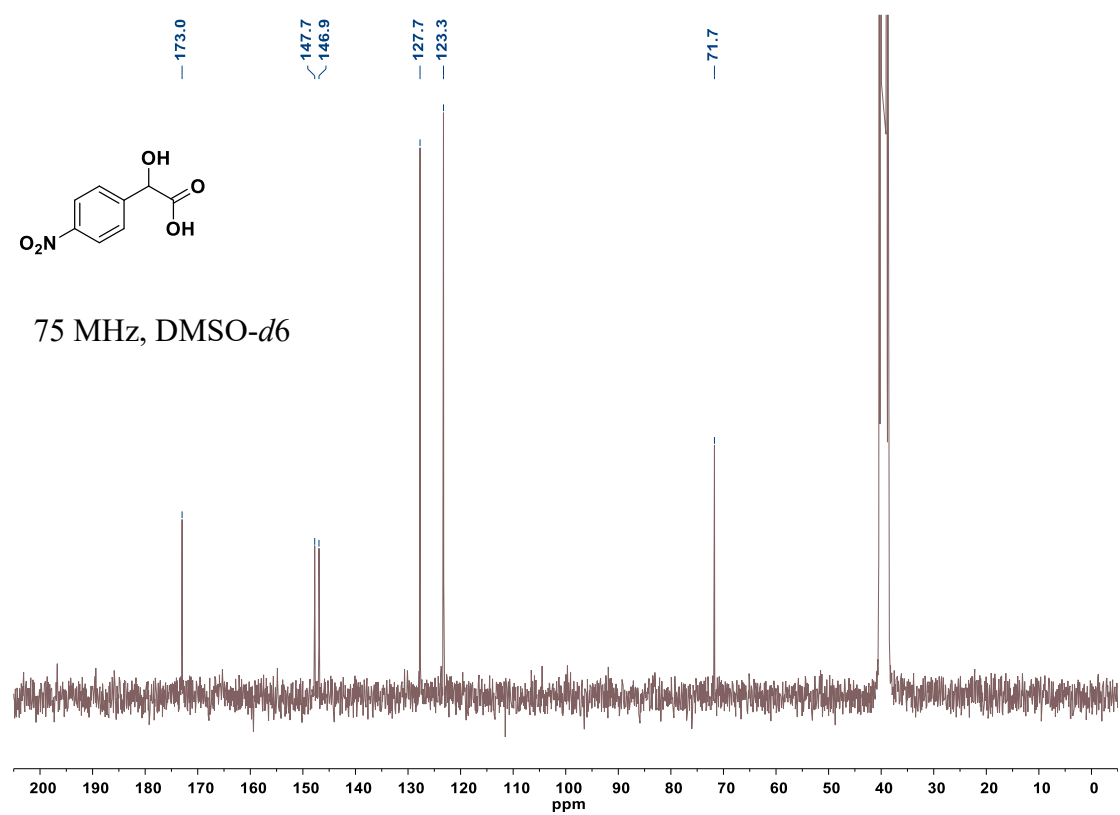

Copies of  $^1\text{H}$  and  $^{13}\text{C}\{^1\text{H}\}$  spectra of compound **2m**

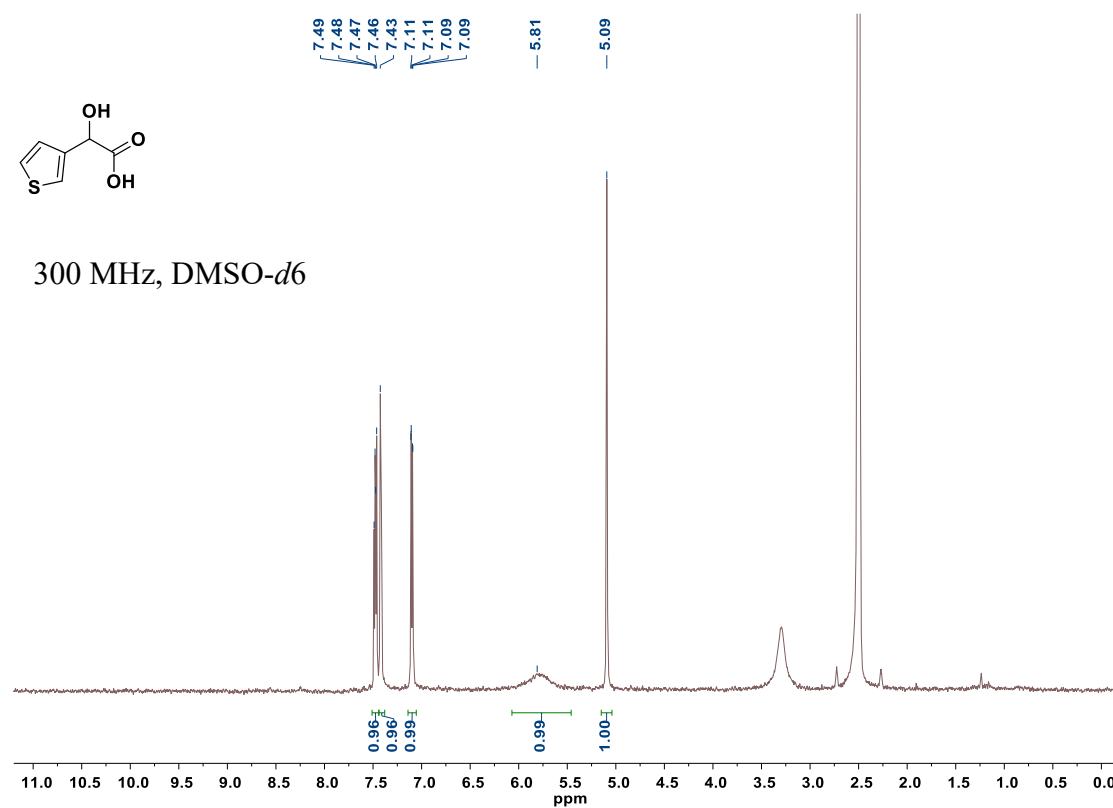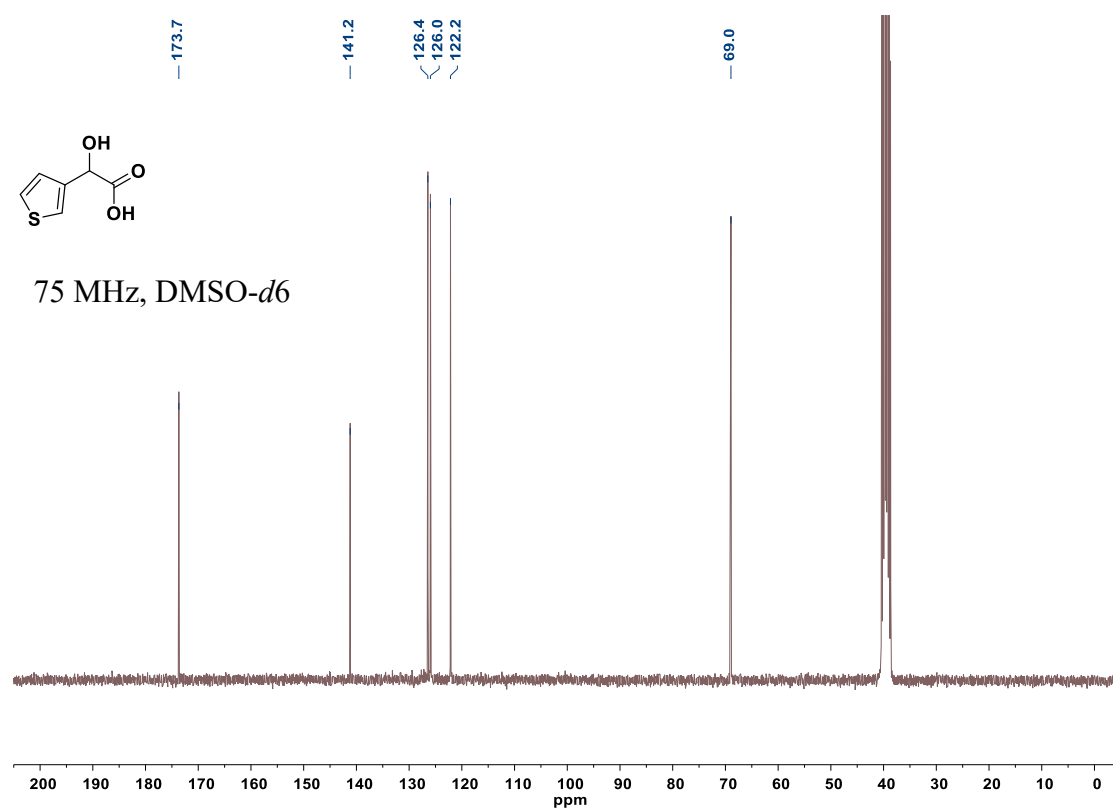

Copies of  $^1\text{H}$  and  $^{13}\text{C}\{^1\text{H}\}$  spectra of compound **2n**

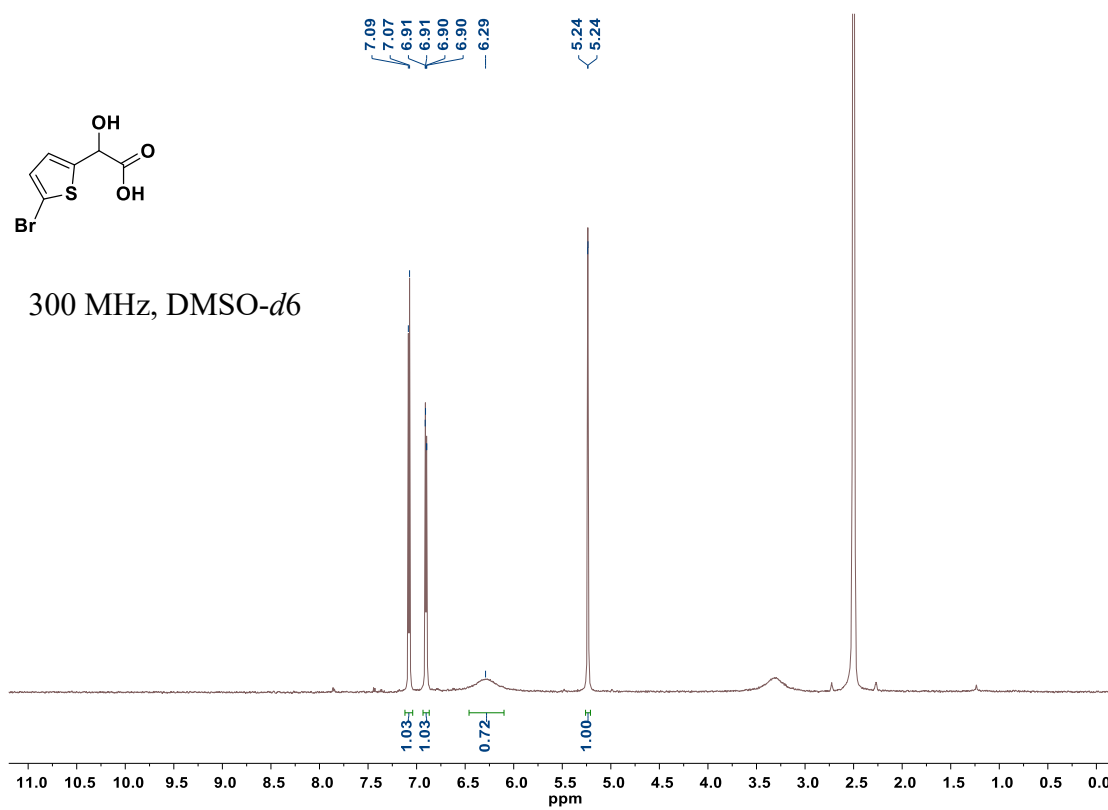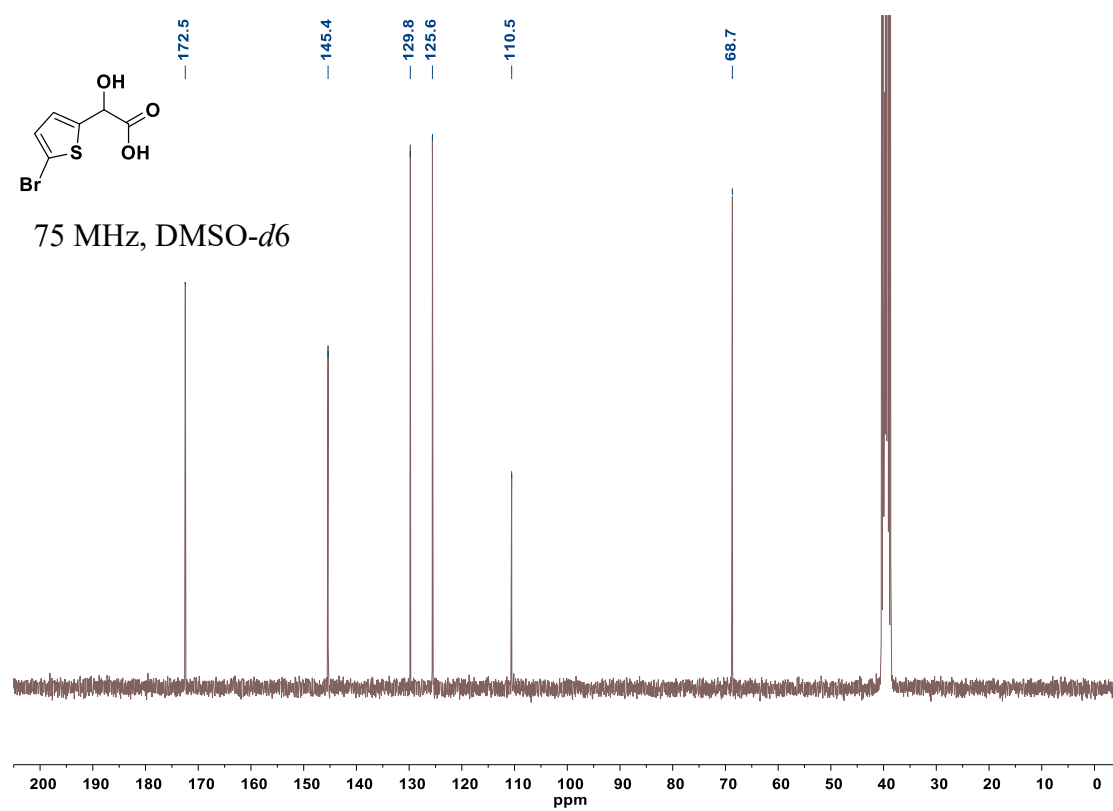

## Copies of HRMS spectra of compounds 2

Copy of HRMS spectrum of compound **2b**

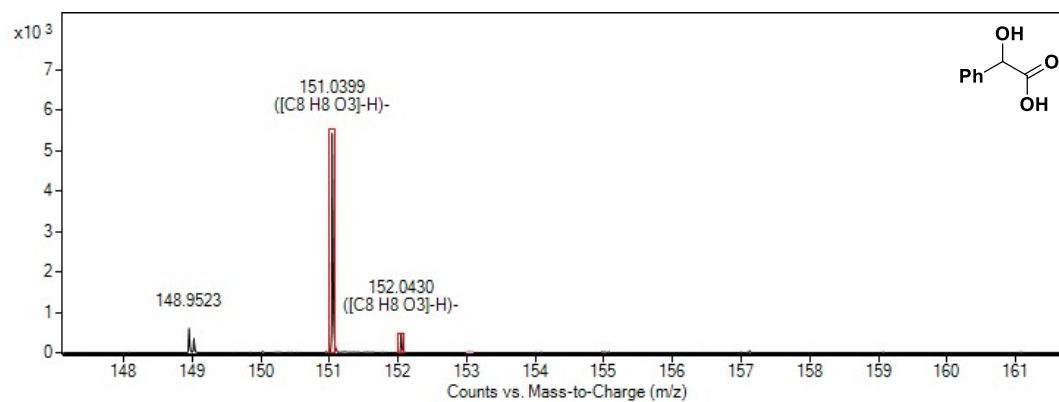

Copy of HRMS spectrum of compound **2c**

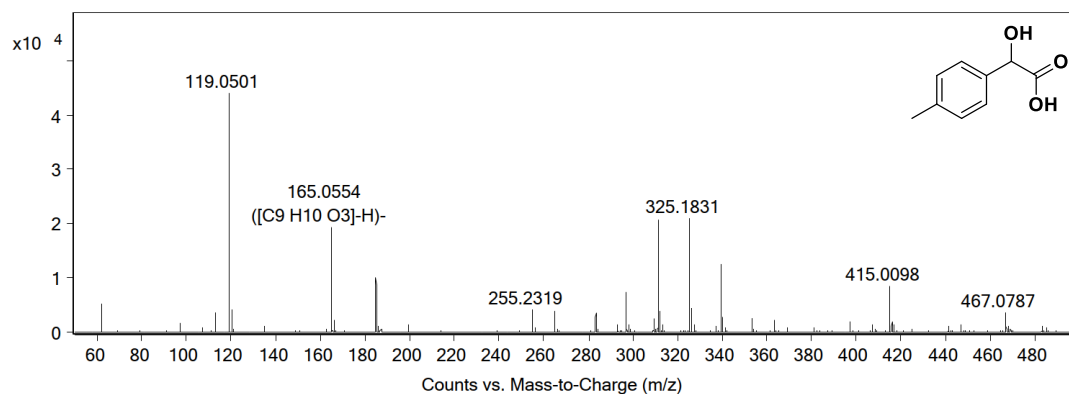

Copy of HRMS spectrum of compound **2d**

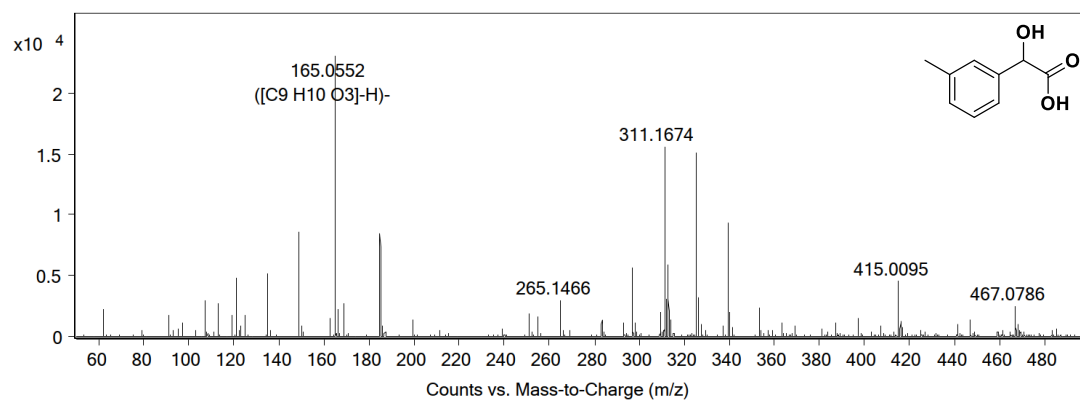

Copy of HRMS spectrum of compound **2e**

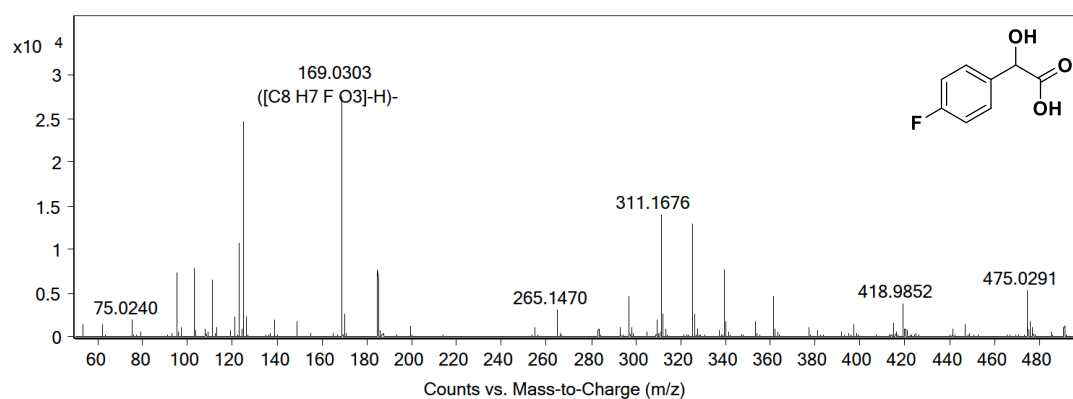

Copy of HRMS spectrum of compound **2f**

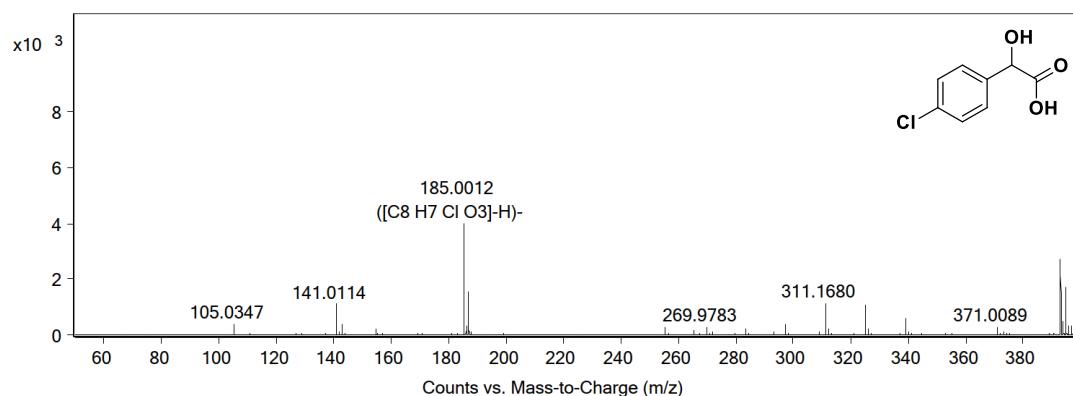

Copy of HRMS spectrum of compound **2g**

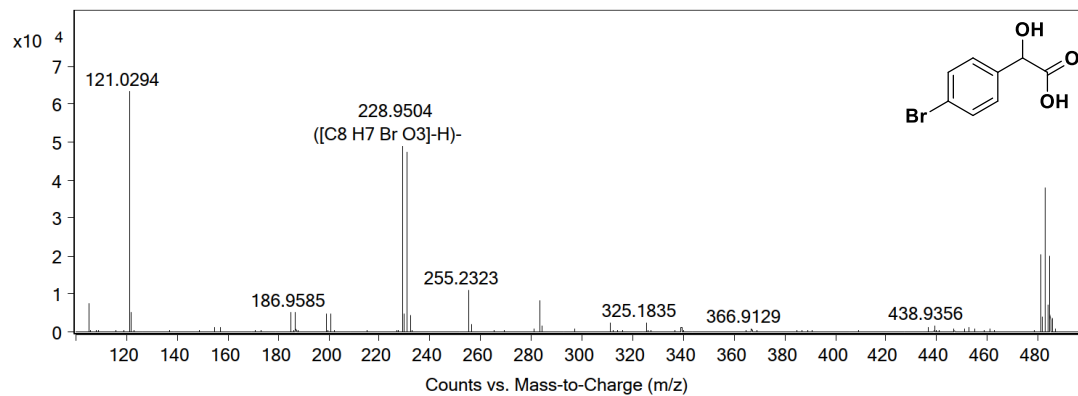

Copy of HRMS spectrum of compound **2h**

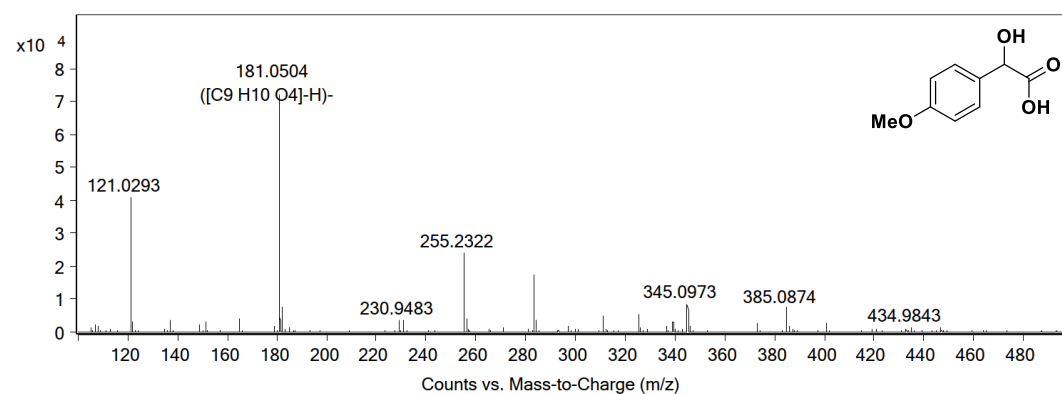

Copy of HRMS spectrum of compound **2i**

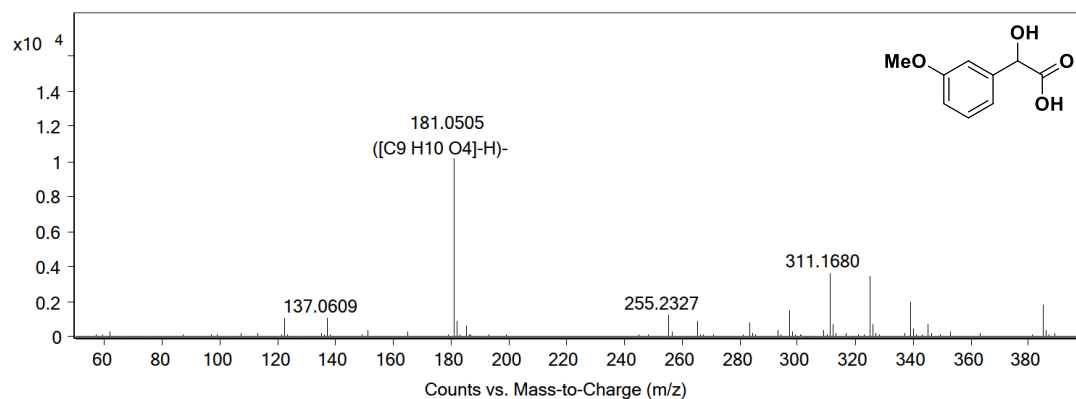

Copy of HRMS spectrum of compound **2j**

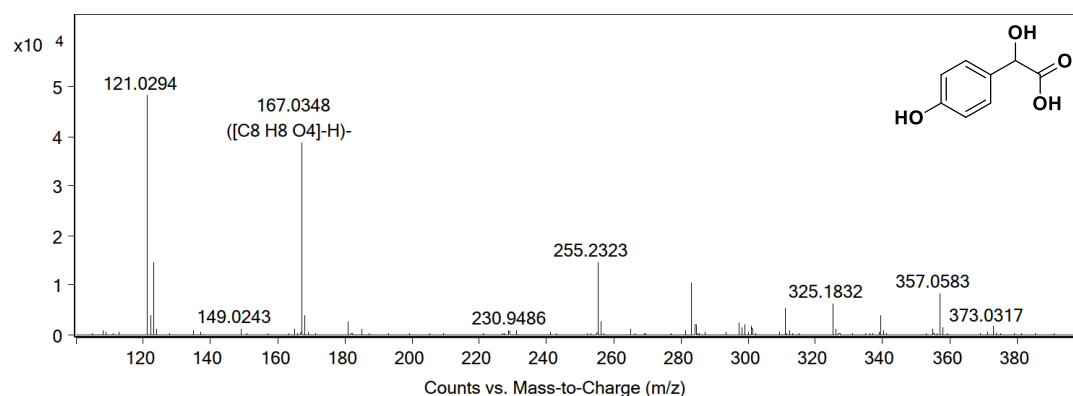

Copy of HRMS spectrum of compound **2k**

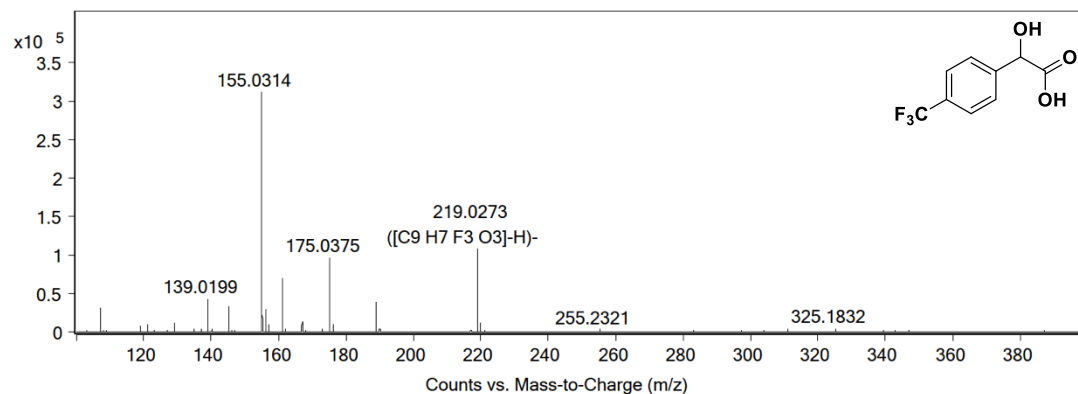

Copy of HRMS spectrum of compound **2l**

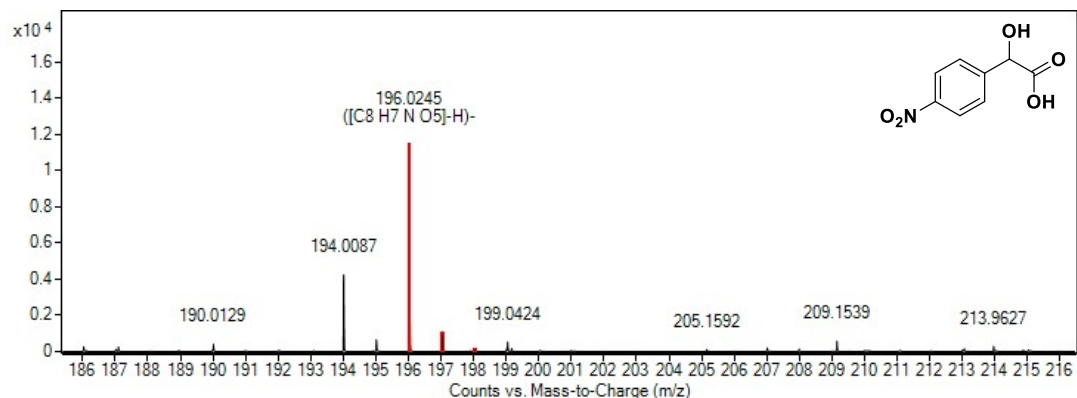

Copy of HRMS spectrum of compound **2m**

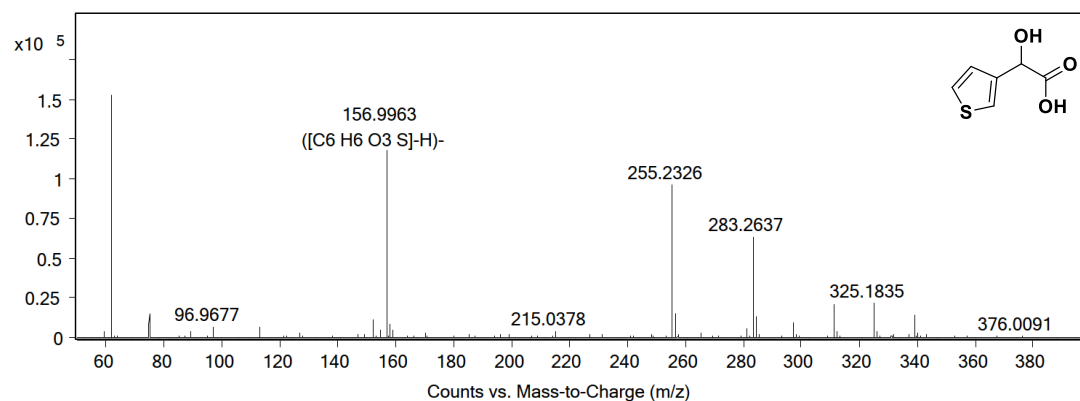

Copy of HRMS spectrum of compound **2n**

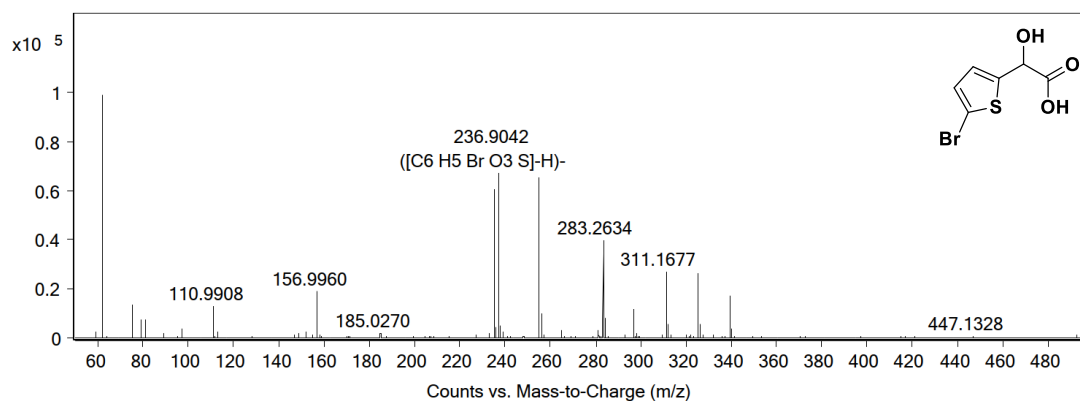

Supplement: d3ob02098c1.pdf [file d3ob02098c1.pdf]
